# Supplementary material for: Peptide lipidation in lysophospholipid micelles and lysophospholipid-enriched membranes
Source: Royal Society of Chemistry journal article supplement (doi:10.1039/d1fd00030f), 2021-01-01
Supplement: d1fd00030f1.pdf [file d1fd00030f1.pdf]

## Peptide Lipidation in Lysophospholipid Micelles and Lysophospholipid-Enriched Membranes

Vian S Esmail,<sup>1,2</sup> Hannah M Britt,<sup>1,3</sup> Jackie A Mosely<sup>4</sup> and John M Sanderson<sup>1</sup>

1. Chemistry Department, Durham University, Durham, DH1 3LE, UK

2. Current address: Chemistry Department, Soran University, Kurdistan Region, Iraq

3. Current address: Institute of Structural & Molecular Biology, University College London, Gower Street, London, WC1E 6BT

4. National Horizons Centre, School of Health & Life Sciences, Teesside University, Darlington DL1 1HG

### Supporting Information: Contents

#### Chromatograms and Mass Spectra

|                                                                         |    |
|-------------------------------------------------------------------------|----|
| 1. Melittin + 1 Acyl Group (Fig. S1)                                    | 2  |
| 2. Melittin + 2 Acyl Groups (Fig. S2)                                   | 3  |
| 3. Melittin + 3 Acyl Groups (Fig. S3, S4)                               | 4  |
| 4. Double Acylated (2 × Palmitoyl) Melittin (Fig. S5-S8)                | 6  |
| 5. Doubly Acylated (2 × Oleoyl) Melittin (Fig. S9-S12)                  | 10 |
| 6. Doubly Acylated (1 × Oleoyl + 1 × Palmitoyl) Melittin (Fig. S13-S19) | 14 |

#### Other Figures

|                                                                                |    |
|--------------------------------------------------------------------------------|----|
| <b>Fig. S20.</b> EICs for palmitoyl and oleoyl melittin (Fig. S20)             | 21 |
| <b>Fig. S21.</b> LC-MS analyses of OPC, and DPPC + melittin (Fig. S21)         | 22 |
| <b>Fig. S22.</b> CMC measurements for palmitoyl and oleoyl melittin (Fig. S22) | 23 |

#### Tables

|                                                                        |    |
|------------------------------------------------------------------------|----|
| <b>Tables S1-S2.</b> Melittin + OPC (S1) or PPC (S2)                   | 24 |
| <b>Tables S3-S4.</b> Melittin + PPC/DOPC (S3) or OPC/DPPC (S4)         | 25 |
| <b>Tables S5-S11.</b> Fragmentation of double palmitoylated melittin   | 27 |
| <b>Tables S12-S18.</b> Fragmentation of double oleoylated melittin     | 31 |
| <b>Tables S19-S32.</b> Fragmentation of 1×oleoyl, 1×palmitoyl melittin | 34 |

#### References

45

## Supporting Information: Chromatograms

### 1. Melittin + 1 Acyl Group

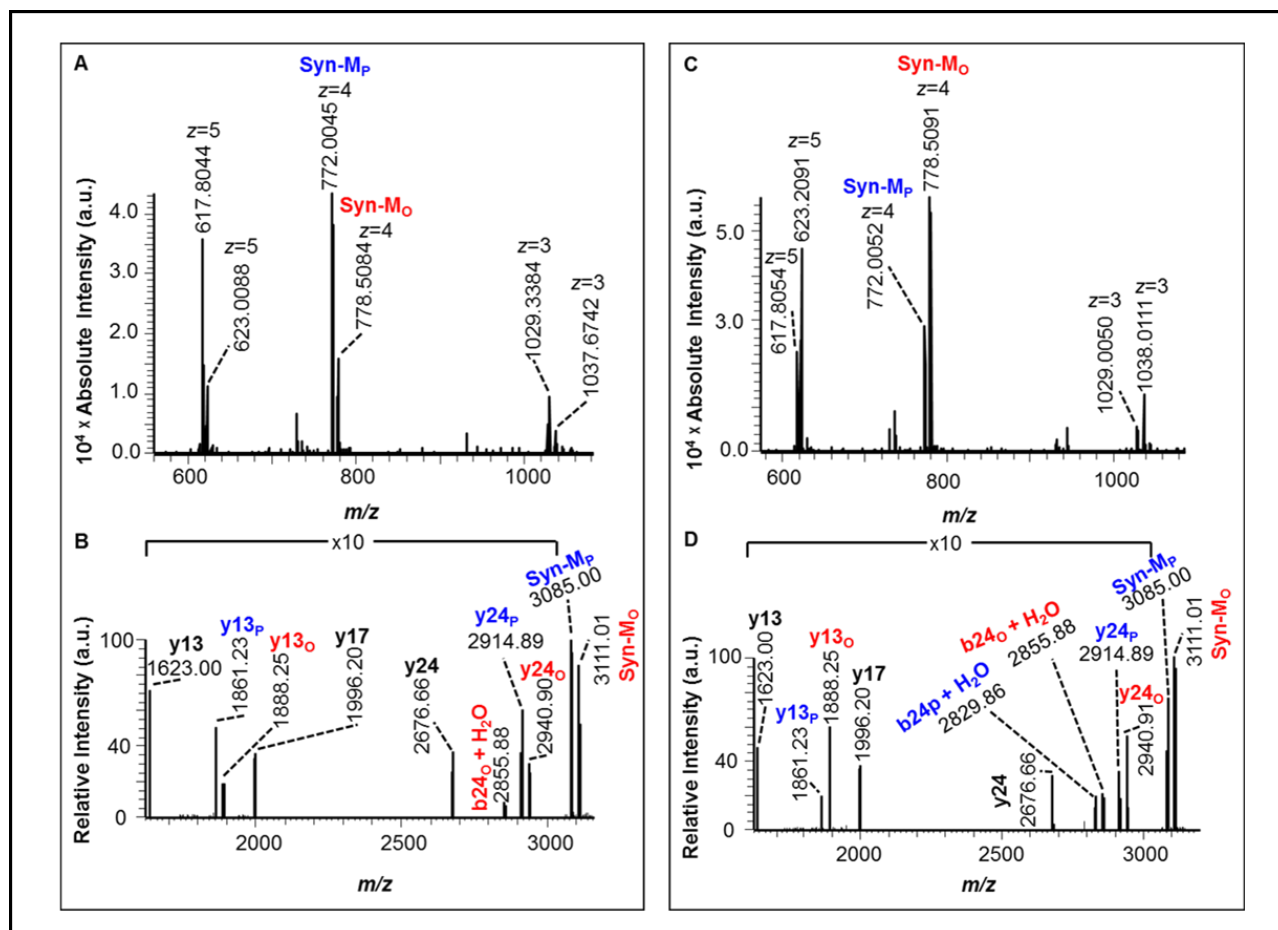

**Figure S1.** Mass spectra for melittin modified with a single acyl group. All were obtained from analyses of melittin incubated with mixtures of lysolipid/lipid, 1:1 (Fig. 3, main article; RT = 7.9–9.8 min). (B) and (D) are deconvoluted from (A) and (C) respectively. (A) and (B): melittin + 50:50 PPC:DOPC. Assignments are in Table S3. (C) and (D): melittin + 50:50 OPC:DPPC. Assignments are in Table S4. Ions labeled Syn-M<sub>P</sub> and Syn-M<sub>O</sub> correspond respectively to the addition of a single palmitoyl or oleoyl group. Fragment ions (*b* and *y*) modified with an acyl group are labelled with a P or O subscript according to the identity of the acyl group.

## 2. Melittin + 2 Acyl Groups

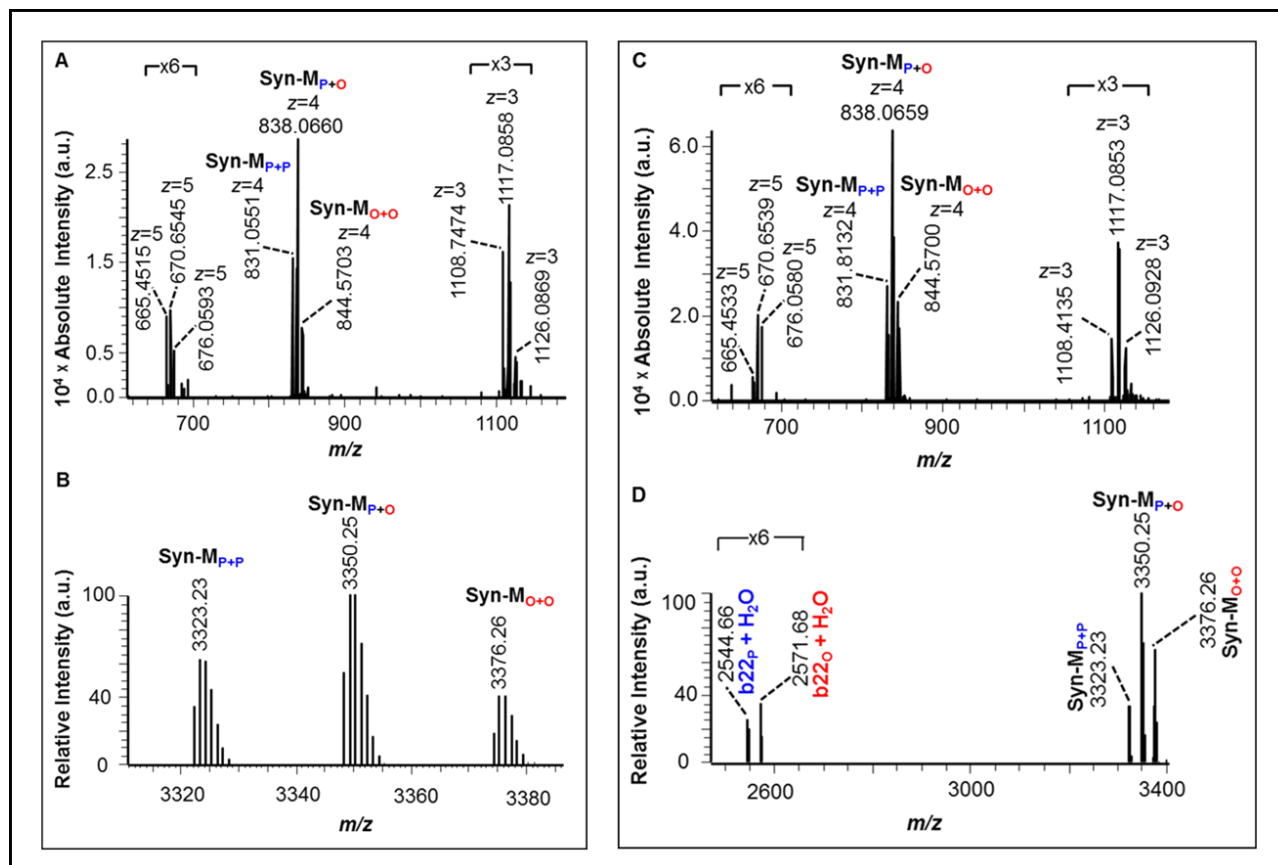

**Figure S2.** Mass spectra for melittin modified with 2 acyl groups. All were obtained following incubation at 37 °C over 168 h using the LC-MS conditions in Fig. 2 (main article). (B) and (D) are deconvoluted from (A) and (C) respectively. (A) and (B): melittin + 50:50 PPC:DOPC, RT = 9.5–11.8 min. Assignments are in Table S3. (C) and (D): melittin + 50:50 OPC:DPPC, RT = 9.6–11.9 min. Assignments are in Table S4. Ions labeled Syn- $M_{P+P}$ , Syn- $M_{P+O}$  and Syn- $M_{O+O}$  correspond respectively to the double addition of acyl groups (2 palmitoyl, 1 oleoyl + 1 palmitoyl or 2 oleoyl respectively). Fragment ions ( $b$  and  $y$ ) modified with an acyl group are labelled with a P or O subscripts according to the identity of the acyl group.

### 3. Melittin + 3 Acyl Groups

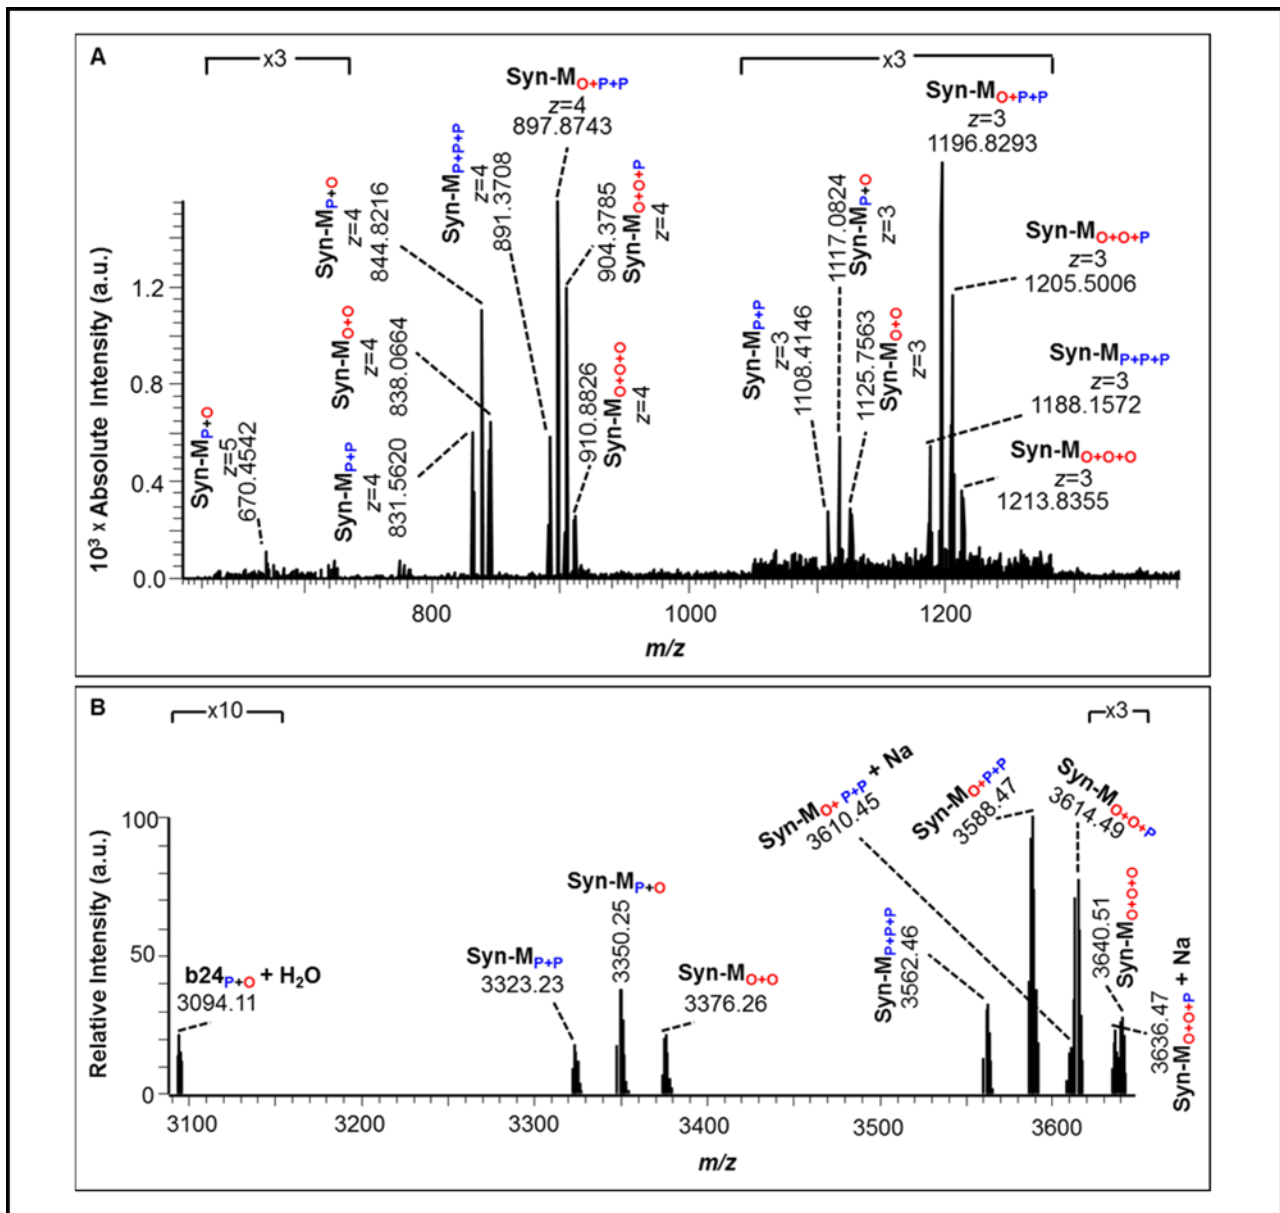

**Figure S3.** Mass spectra for melittin modified with 3 acyl groups following incubation with 50:50 PPC:DOPC at 37 °C over 168 h using the LC-MS conditions in Fig. 2 (main article), RT = 17–19 min. (A) mass spectrum over different charge states. The spectrum includes some ions with 2 acyl groups that were formed by in-source fragmentation of melittin + 3 acyl groups. Syn-M<sub>P+P+P</sub>, Syn-M<sub>O+P+P</sub>, Syn-M<sub>O+O+P</sub> and Syn-M<sub>O+O+O</sub> correspond respectively to the triple addition of acyl groups (3 palmitoyl, 1 oleoyl + 2 palmitoyl, 2 oleoyl + 1 palmitoyl, or 3 oleoyl respectively). Other peaks are labelled as per Fig. S2. Assignments are in Table S3.

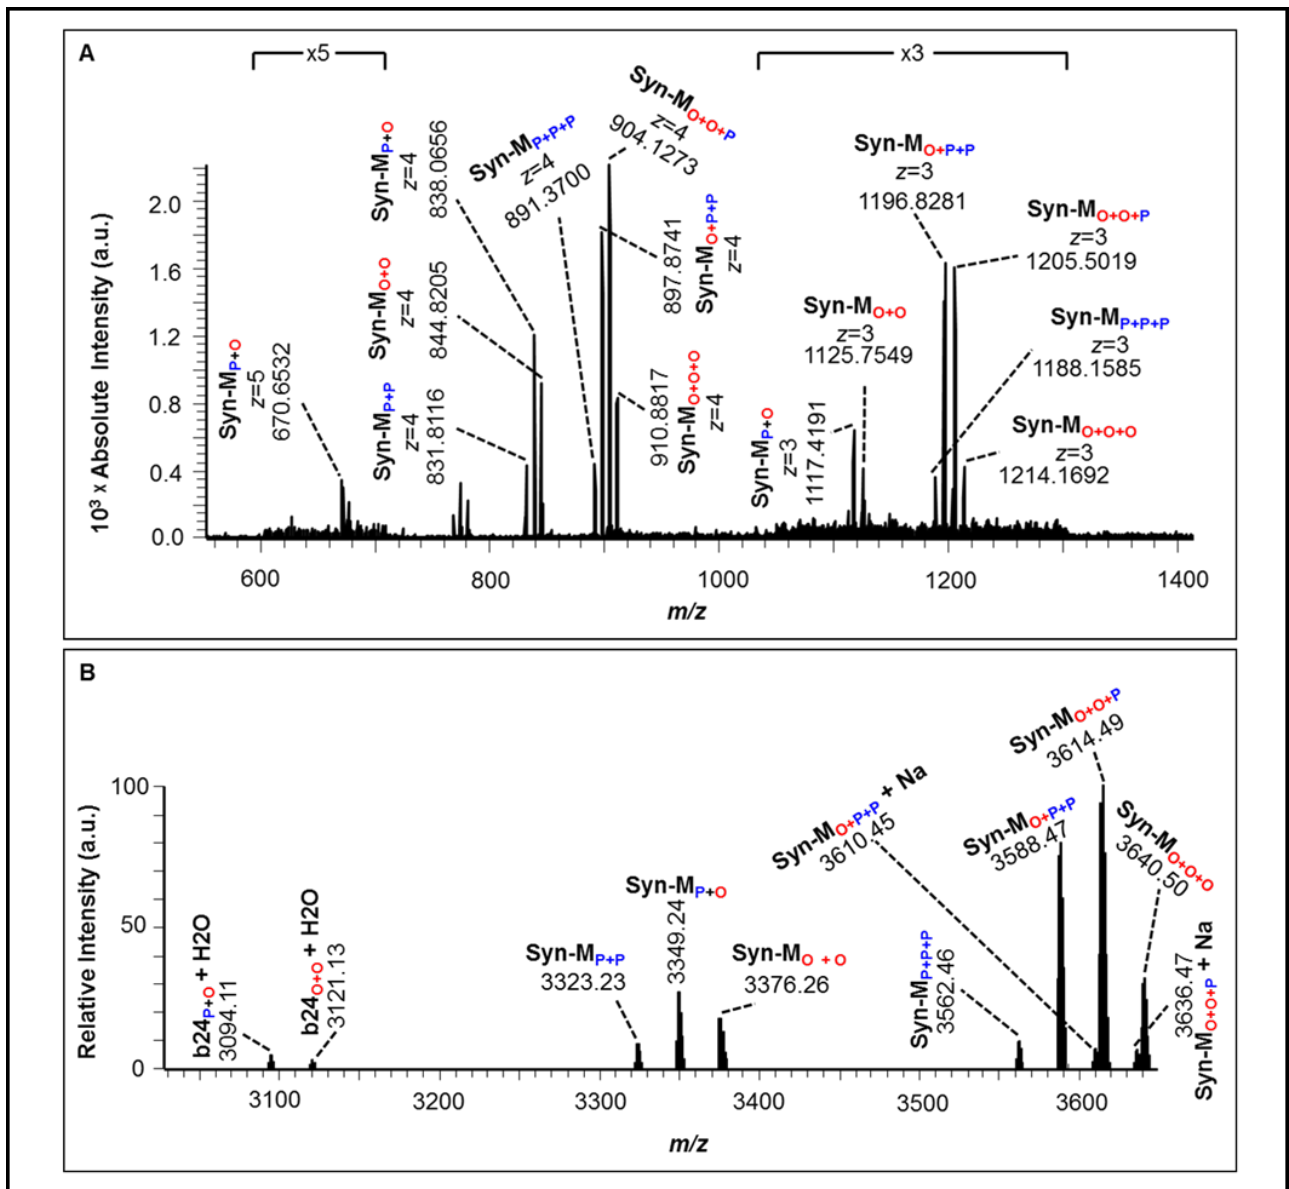

**Figure S4.** Mass spectra for melittin modified with 3 acyl groups following incubation with 50:50 OPC:DPPC at 37 °C over 168 h using the LC-MS conditions in Fig. 2 (main article), RT = 17–19 min. (A) mass spectrum over different charge states. The spectrum includes some ions with 2 acyl groups that were formed by in-source fragmentation of melittin + 3 acyl groups. Syn-M<sub>P+P+P</sub>, Syn-M<sub>O+P+P</sub>, Syn-M<sub>O+O+P</sub> and Syn-M<sub>O+O+O</sub> correspond respectively to the triple addition of acyl groups (3 palmitoyl, 1 oleoyl + 2 palmitoyl, 2 oleoyl + 1 palmitoyl, or 3 oleoyl respectively). Other peaks are labelled as per Fig. S2. Assignments are in Table S4.

#### 4. Double Acylated (2 × Palmitoyl) Melittin

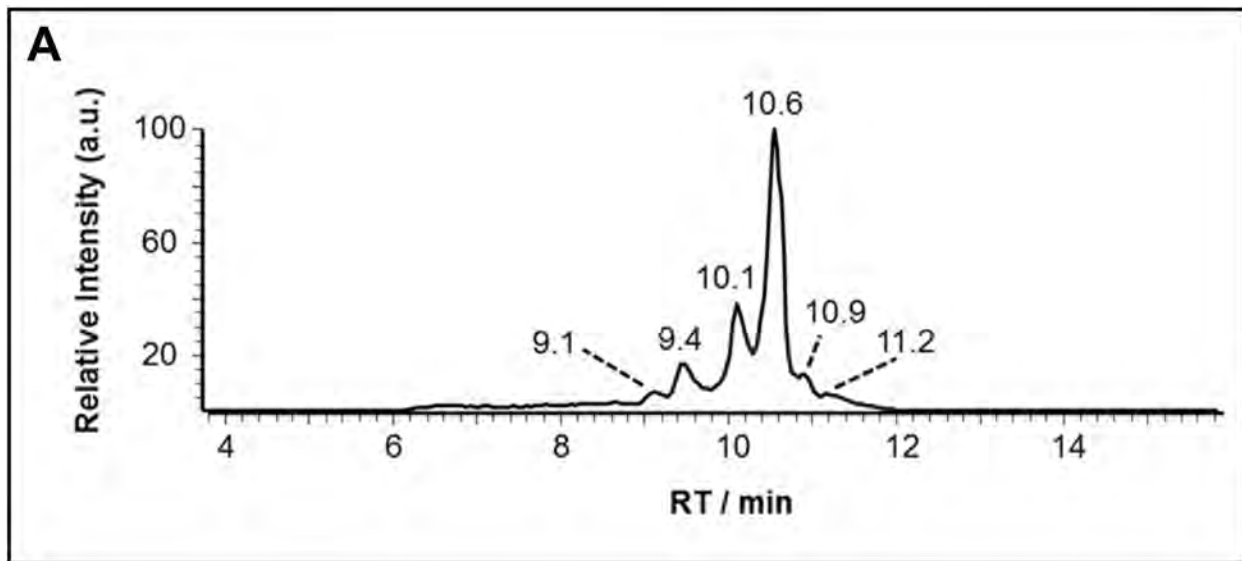

**B**

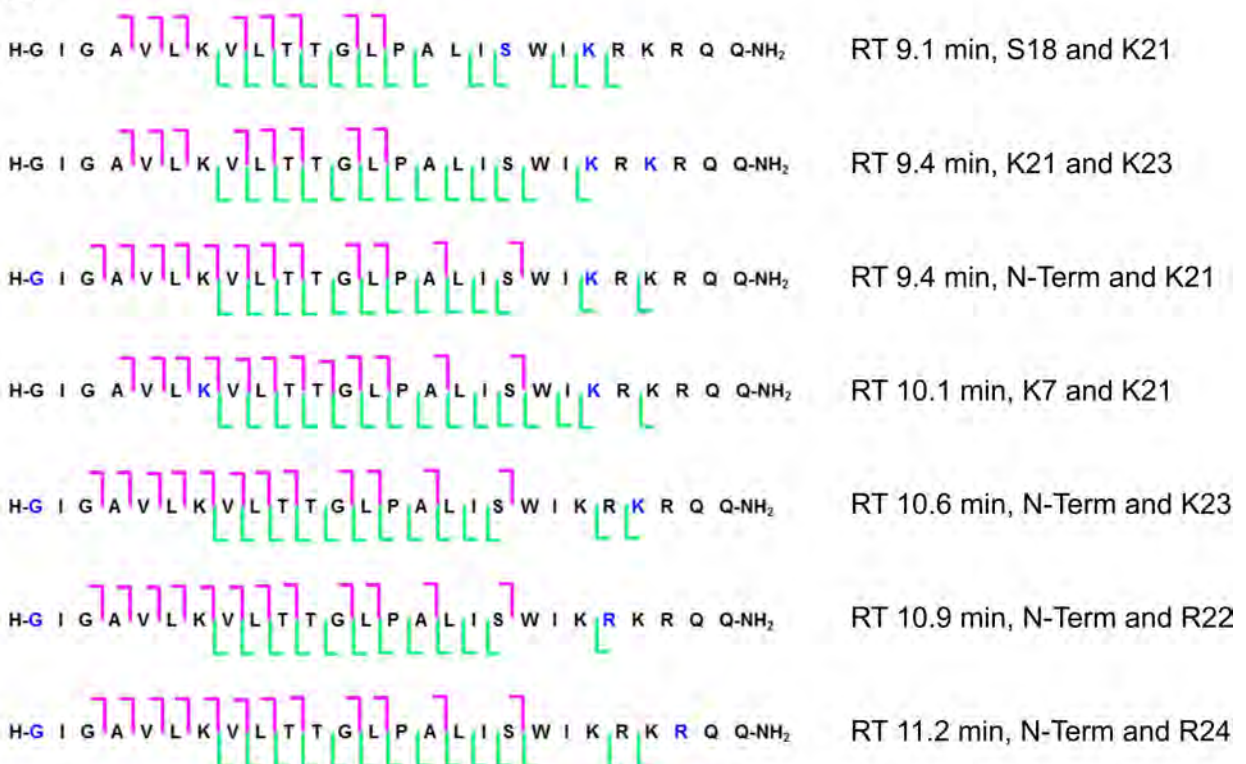

**Fig. S5. A.** TIC from CID fragmentation of melittin modified by two palmitoyl groups at  $m/z$  832 ( $z = 4$ ) on ESI-LTQ-MS (LTQFT). Modified melittin was prepared by incubation of synthetic melittin with 50:50 PPC:DOPC over 168 h at 37 °C. **B.** Sequence ladders summarising  $y$ -type (green) and  $b$ -type (magenta) ions observed following fragmentation of double palmitoylated precursor ions of  $m/z$  832 ( $z = 4$ ) by CID (LTQ). Acylation sites are highlighted in blue. Full details are provided in Figs. S6-S8 and Tables S5-S11.

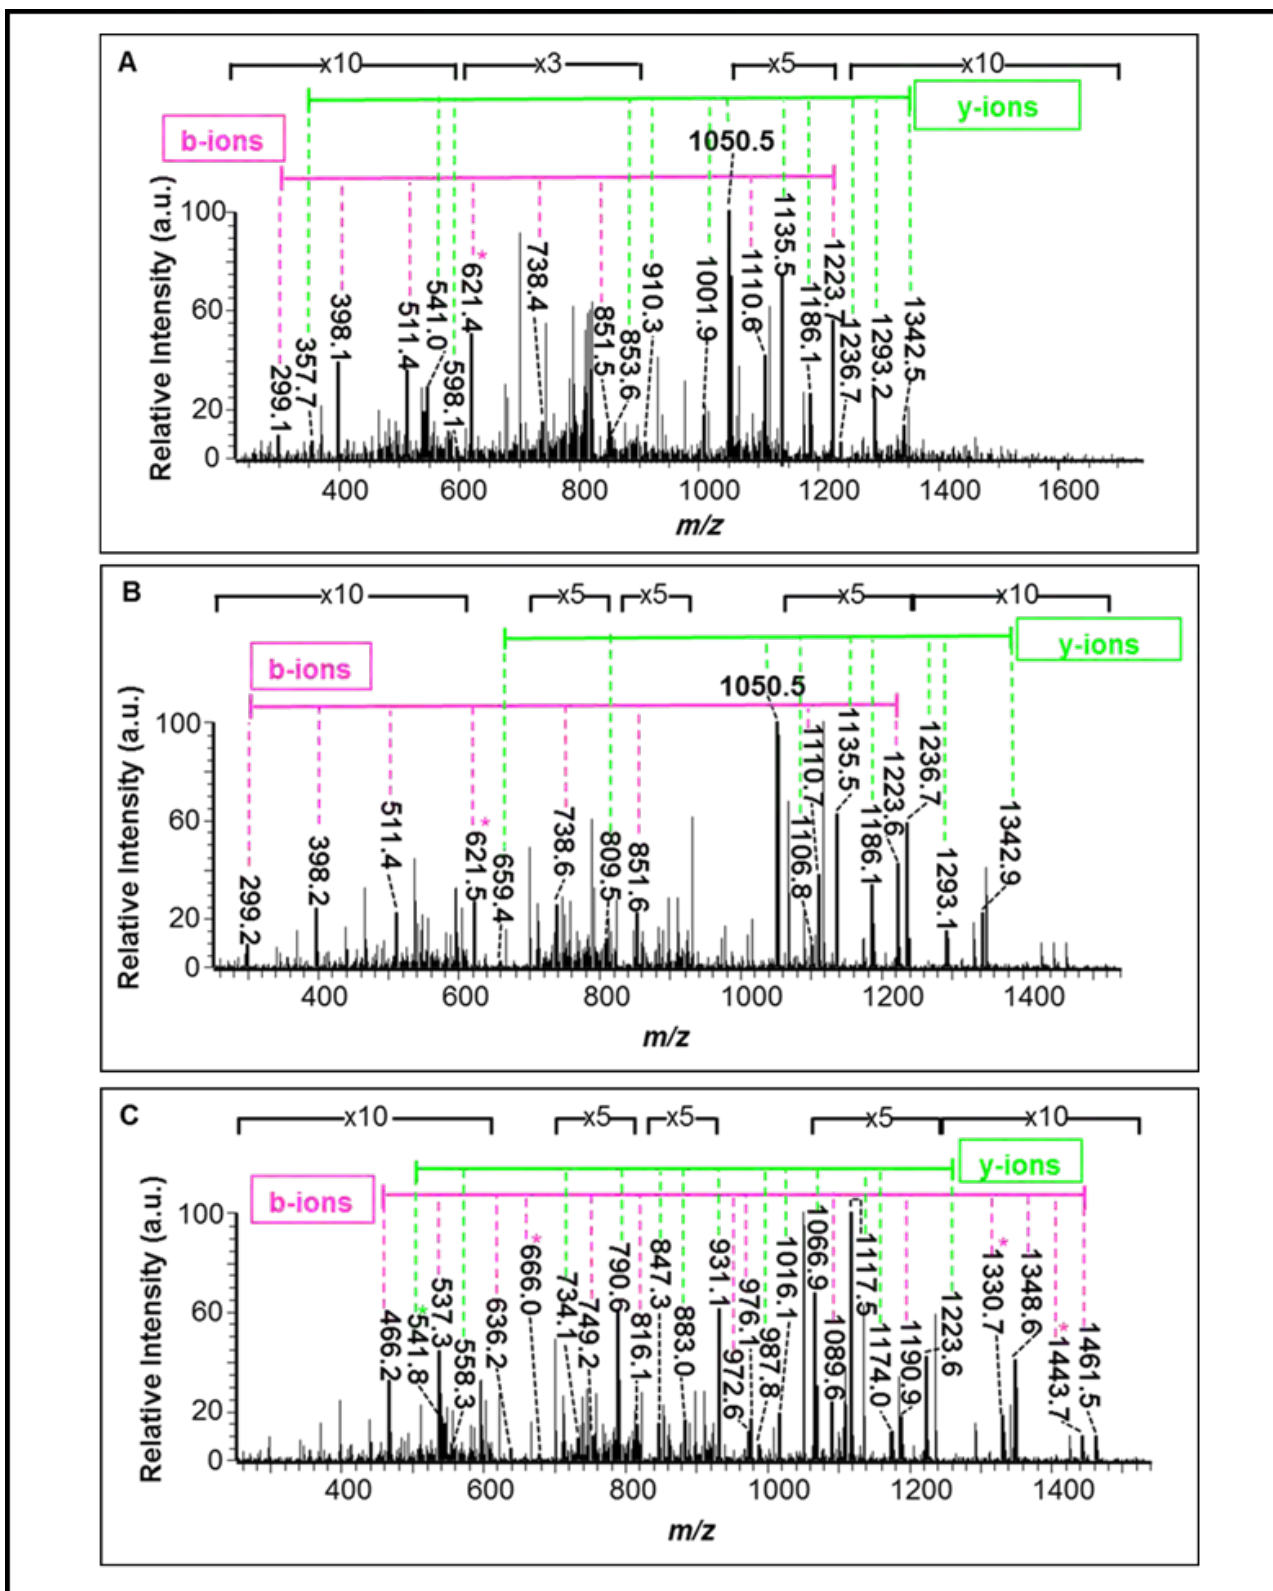

**Fig. S6.** LC-MS<sup>2</sup> spectra of the precursor ion at  $m/z$  832 for  $[M_{P+P} + 4H]^{4+}$  at 9.1 min (A) and 9.4 min (B and C; Fig. S5). The y-type and b-type ions are shown on each spectrum. The peaks labelled with an asterisk represent:  $m/z$  621.4,  $[(b_{13} + H_2O) + 2H]^{2+}$ ;  $m/z$  541.8,  $[(y_4 - NH_3) + H]^+$ ;  $m/z$  666.0,  $[(b_{12P} - H_2O) + 2H]^{2+}$ ;  $m/z$  1330.7,  $[(b_{12P} - H_2O) + H]^+$ ;  $m/z$  1443.7,  $[(b_{13P} - H_2O) + H]^+$ . Data are tabulated in Tables S5-S7.



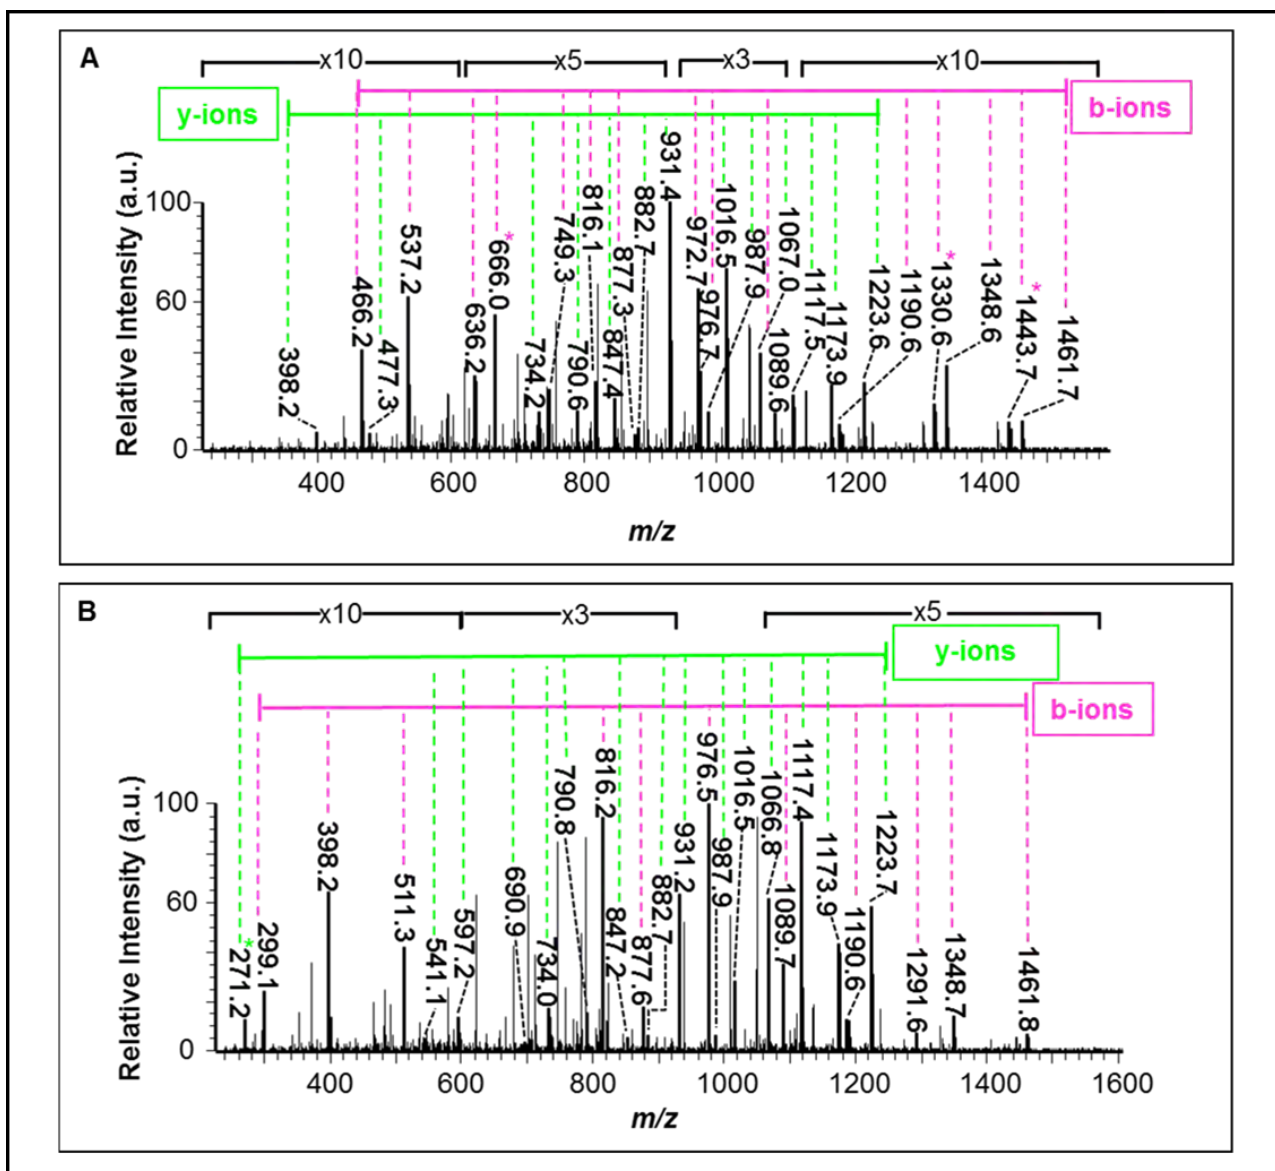

**Fig. S7.** LC-MS<sup>2</sup> spectra of the precursor ion at  $m/z$  832 for  $[M_{P+P} + 4H]^{4+}$  at 10.6 min (**A**) and 10.1 min (**B** and **C**; Fig. S5). The  $y$ -type and  $b$ -type ions are shown on each spectrum. The peaks labelled with an asterisk represent:  $m/z$  621.4,  $[(b_{13} + H_2O) + 2H]^{2+}$ ;  $m/z$  271.2,  $[(y_4 - NH_3) + 2H]^{2+}$ ;  $m/z$  666.0,  $[(b_{12P} - H_2O) + 2H]^{2+}$ ;  $m/z$  1330.6,  $[(b_{12P} - H_2O) + H]^+$ ;  $m/z$  1443.7,  $[(b_{13P} - H_2O) + H]^+$ . Data are tabulated in Tables S8 and S9.



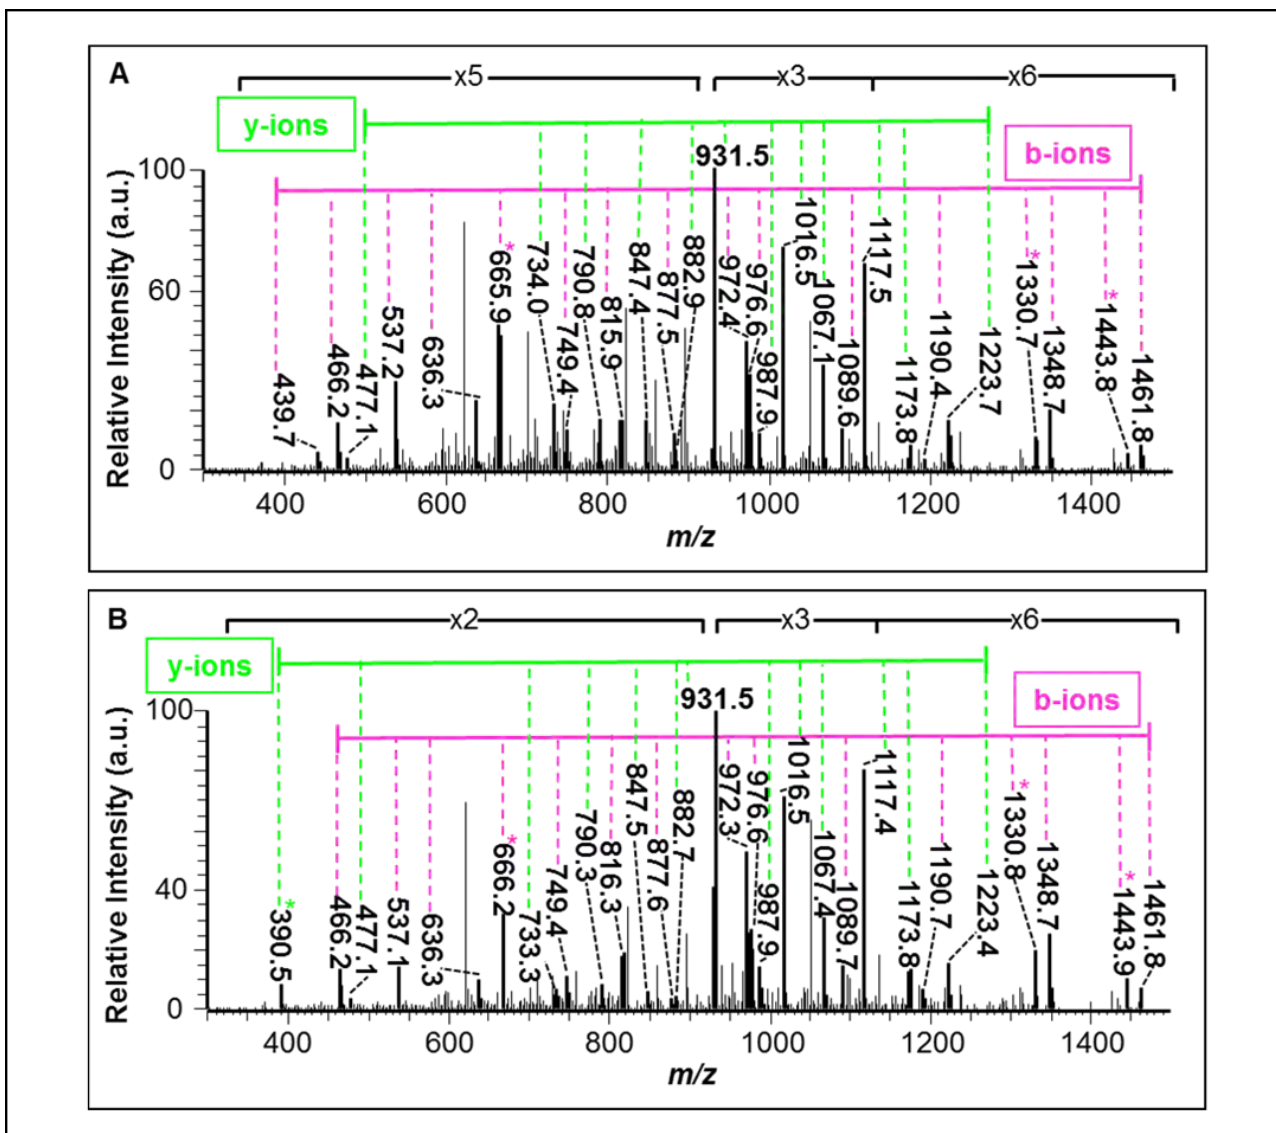

**Fig. S8.** LC-MS<sup>2</sup> spectra of the precursor ion at  $m/z$  832 for  $[M_{P+P} + 4H]^{4+}$  at 10.9 min (**A**) and 11.2 min (**B** and C; Fig. S5). The y-type and b-type ions are shown on each spectrum. The peaks labelled with an asterisk represent:  $m/z$  390.5,  $[(y_4 - NH_3) + 2H]^{2+}$ ;  $m/z$  665.9,  $[(b_{12P} - H_2O) + 2H]^{2+}$ ;  $m/z$  1330.7,  $[(b_{12P} - H_2O) + H]^+$ ;  $m/z$  1443.8,  $[(b_{13P} - H_2O) + H]^+$ . Data are tabulated in Tables S10 and S11.

## 5. Doubly Acylated (2 × Oleoyl) Melittin

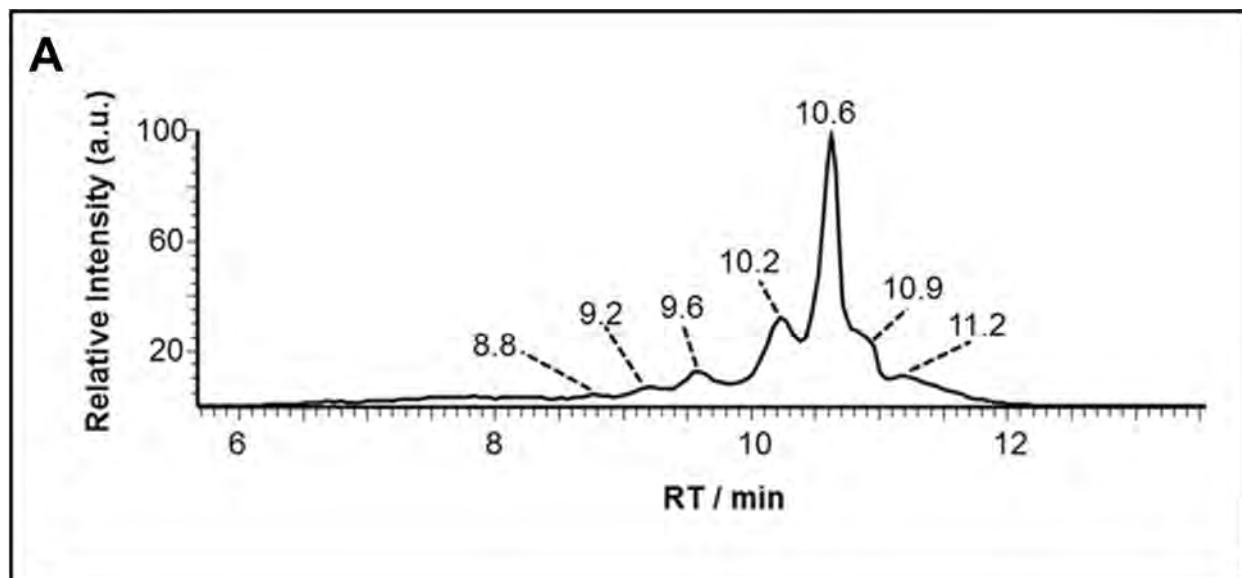

**B**

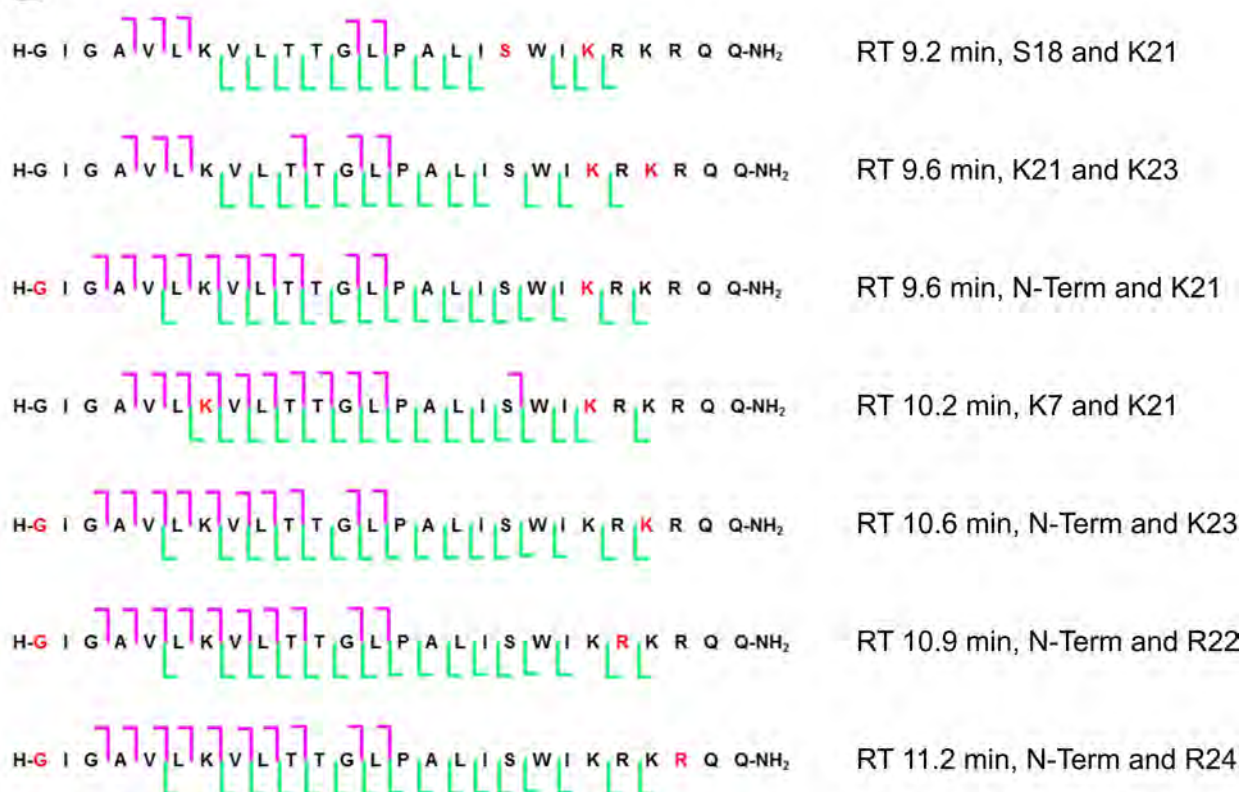

**Fig. S9. A.** TIC from CID fragmentation of melittin modified by two oleoyl groups at  $m/z$  845 ( $z = 4$ ) on ESI-LTQ-MS (LTQFT). Modified melittin was prepared by incubation of synthetic melittin with 50:50 PPC:DOPC over 168 h at 37 °C. **B.** Sequence ladders summarising  $y$ -type (green) and  $b$ -type (magenta) ions observed following fragmentation of double oleoylated precursor ions of  $m/z$  845 ( $z = 4$ ) by CID (LTQ). Acylation sites are highlighted in red. Full details are provided in Figs. S10-S12 and Tables S12-S18.

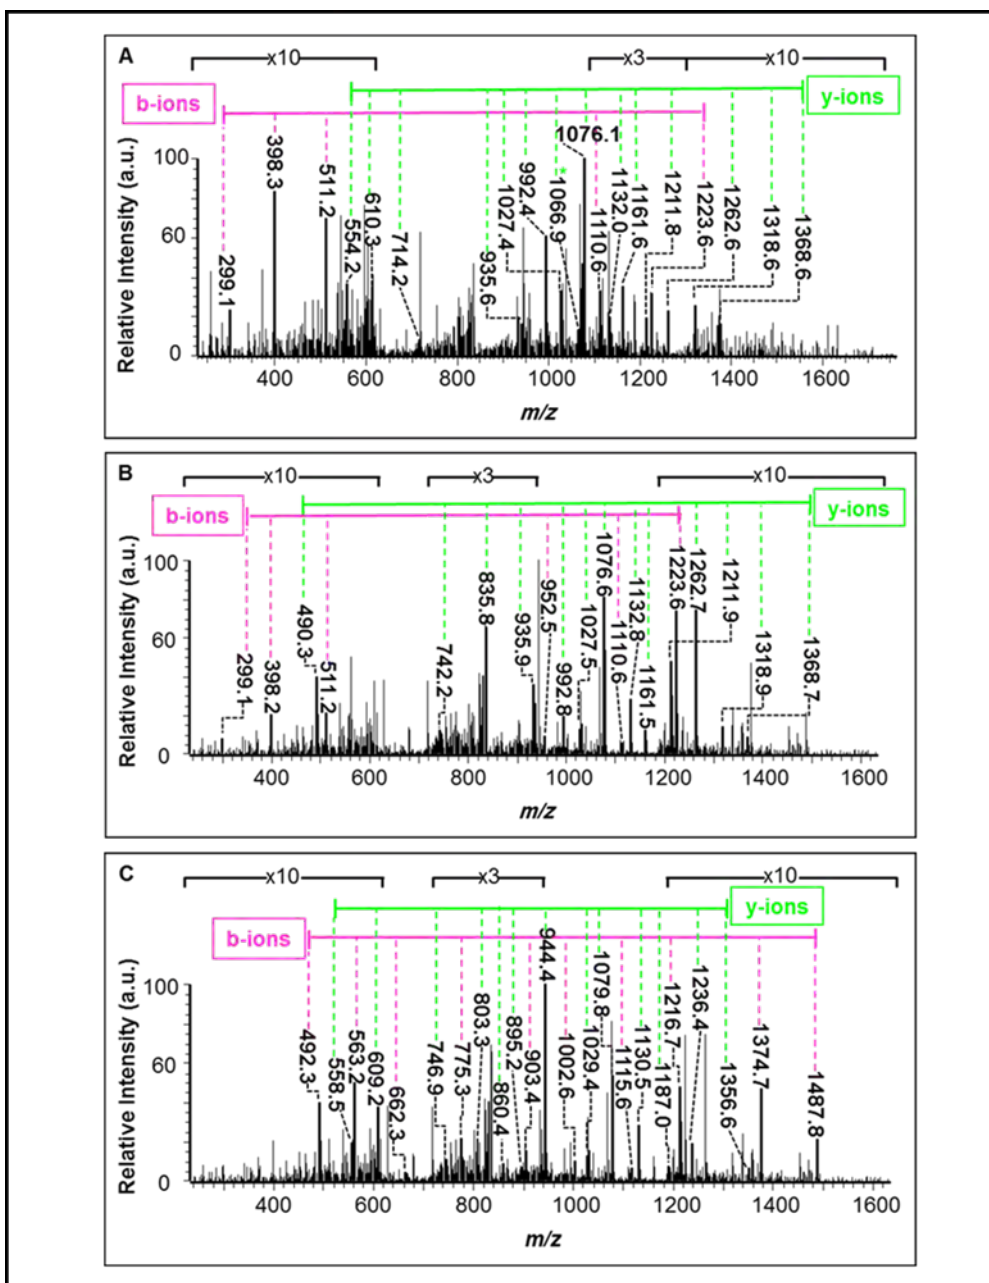

**Fig. S10.** LC-MS<sup>2</sup> spectra of the precursor ion at  $m/z$  845 for  $[M_{O+O} + 4H]^{4+}$  at 9.2 min (**A**) and 9.6 min (**B** and **C**; Fig. S9). The  $y$ -type and  $b$ -type ions are shown on each spectrum. The peak labelled with an asterisk in A represents:  $m/z$  1066.9,  $[(y_{13O+O} + H_2O) - H_2O + 2H]^{2+}$ . Data are tabulated in Tables S12 to S14.

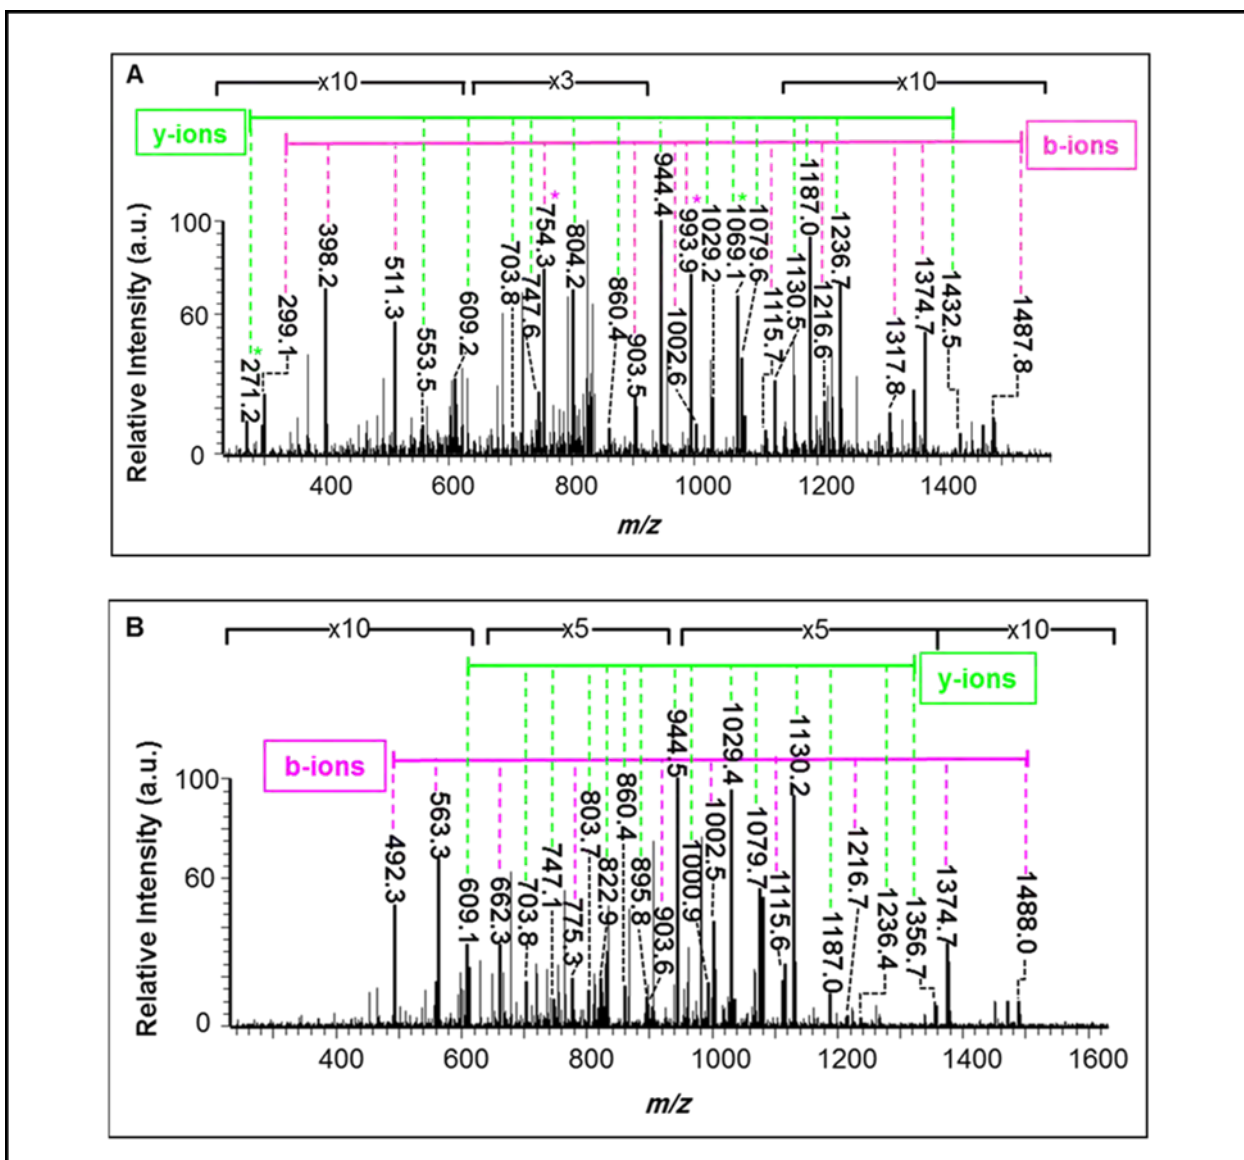

**Fig. S11.** LC-MS<sup>2</sup> spectra of the precursor ion at  $m/z$  845 for  $[M_{0+0} + 4H]^{4+}$  at 10.2 min (**A**) and 10.6 min (**B** and **C**; Fig. S9). The  $y$ -type and  $b$ -type ions are shown on each spectrum. The peaks labelled with an asterisk represent:  $m/z$  271.2,  $[(y_4 - NH_3) + 2H]^{2+}$ ;  $m/z$  806.1,  $[(y_{40} - NH_3) + H]^+$ ;  $m/z$  754.3,  $[(b_{130} + H_2O) + 2H]^{2+}$ ;  $m/z$  993.9,  $[(b_{180} + H_2O) + H]^+$ ;  $m/z$  1069.1,  $[(y_{160} - H_2O) + 2H]^{2+}$ . Data are tabulated in Tables S15 and S16.

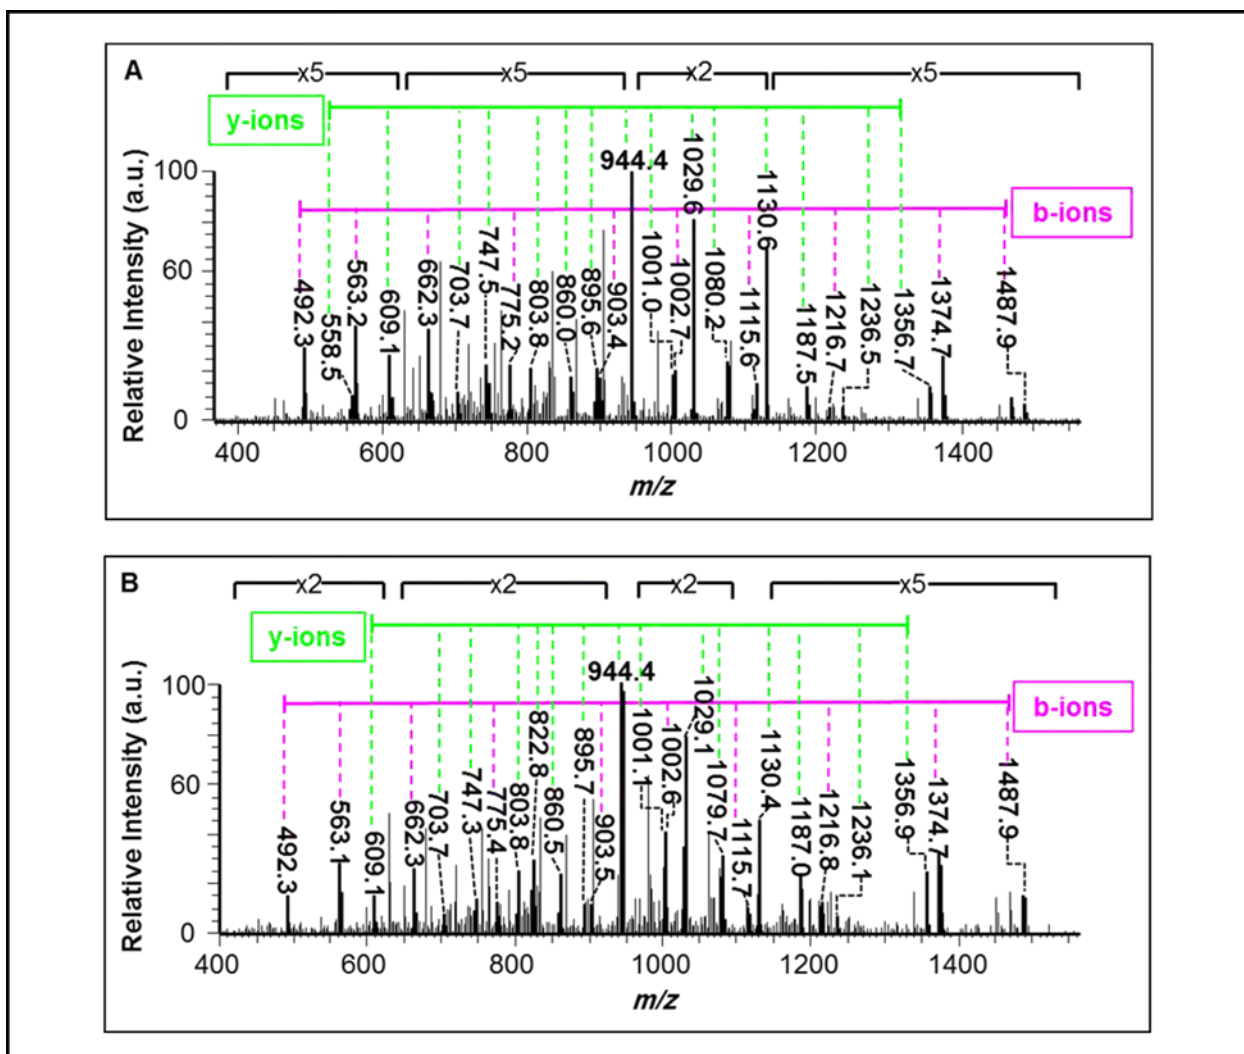

**Fig. S12.** LC-MS<sup>2</sup> spectra of the precursor ion at *m/z* 845 for [M<sub>0+0</sub> + 4H]<sup>4+</sup> at 10.9 min (**A**) and 11.2 min (**B** and **C**; Fig. S9). The *y*-type and *b*-type ions are shown on each spectrum. Data are tabulated in Tables S17 and S18.



## 6. Doubly Acylated (1 × Oleoyl + 1 × Palmitoyl) Melittin

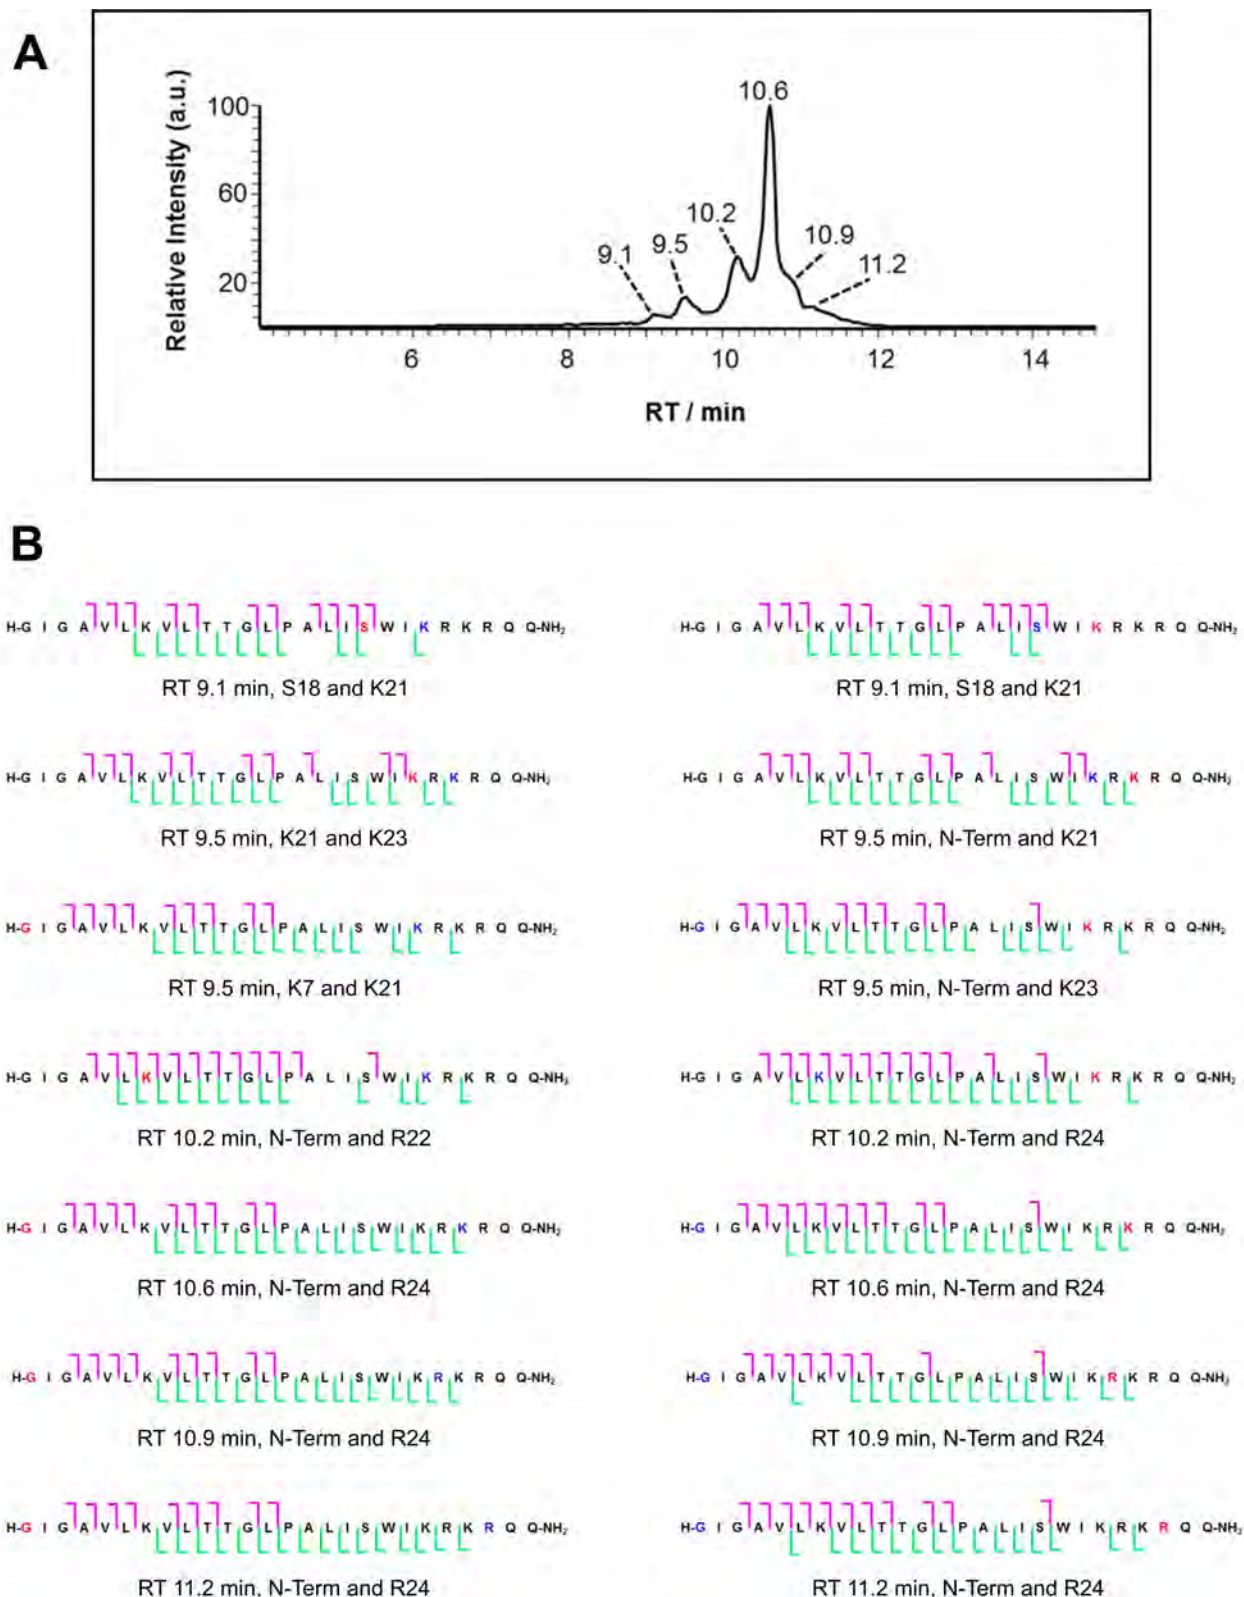

**Fig. S13. A.** TIC from CID fragmentation of melittin modified by one palmitoyl and one oleoyl group at  $m/z$  838 ( $z = 4$ ) on ESI-LTQ-MS (LTQFT). Modified melittin was prepared by incubation of synthetic melittin with 50:50 PPC:DOPC over 168 h at 37 °C. **B.** Sequence ladders summarising  $y$ -type (green) and  $b$ -type (magenta) ions observed following fragmentation of double acylated precursor ions of  $m/z$  838 ( $z = 4$ ) by CID (LTQ). Oleoylation sites are highlighted in red (oleoyl) or blue (palmitoyl). Full details are provided in Figs. S14-S19 and Tables S19-S32.

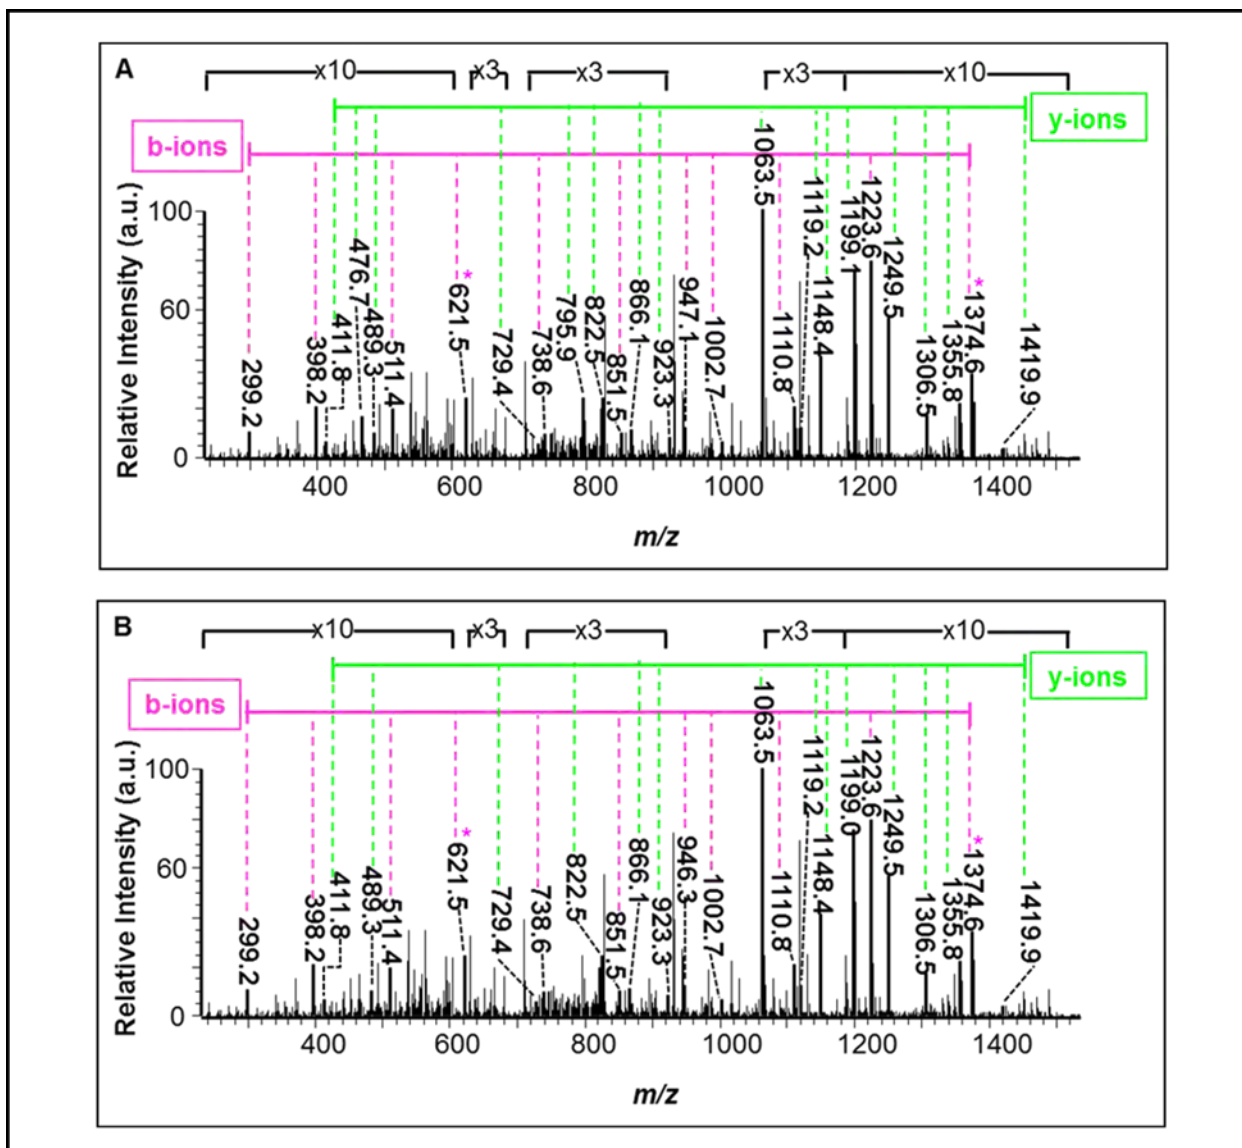

**Fig. S14.** LC-MS<sup>2</sup> spectra of the precursor ion at  $m/z$  838 for  $[M_{P+O} + 4H]^{4+}$  at 9.1 min (Fig. S13). **(A)** corresponds to oleoylation at S18 and palmitoylation at K21. **(B)** corresponds to oleoylation at K21 and palmitoylation at S18. The  $y$ -type and  $b$ -type ions are shown on each spectrum. The peaks labelled with an asterisk represent:  $m/z$  621.4,  $[(b13 + H_2O) + 2H]^{2+}$ ;  $m/z$  1374.6,  $[(b15 - NH_3) + H]^+$ . Data are tabulated in Tables S19 and S20.



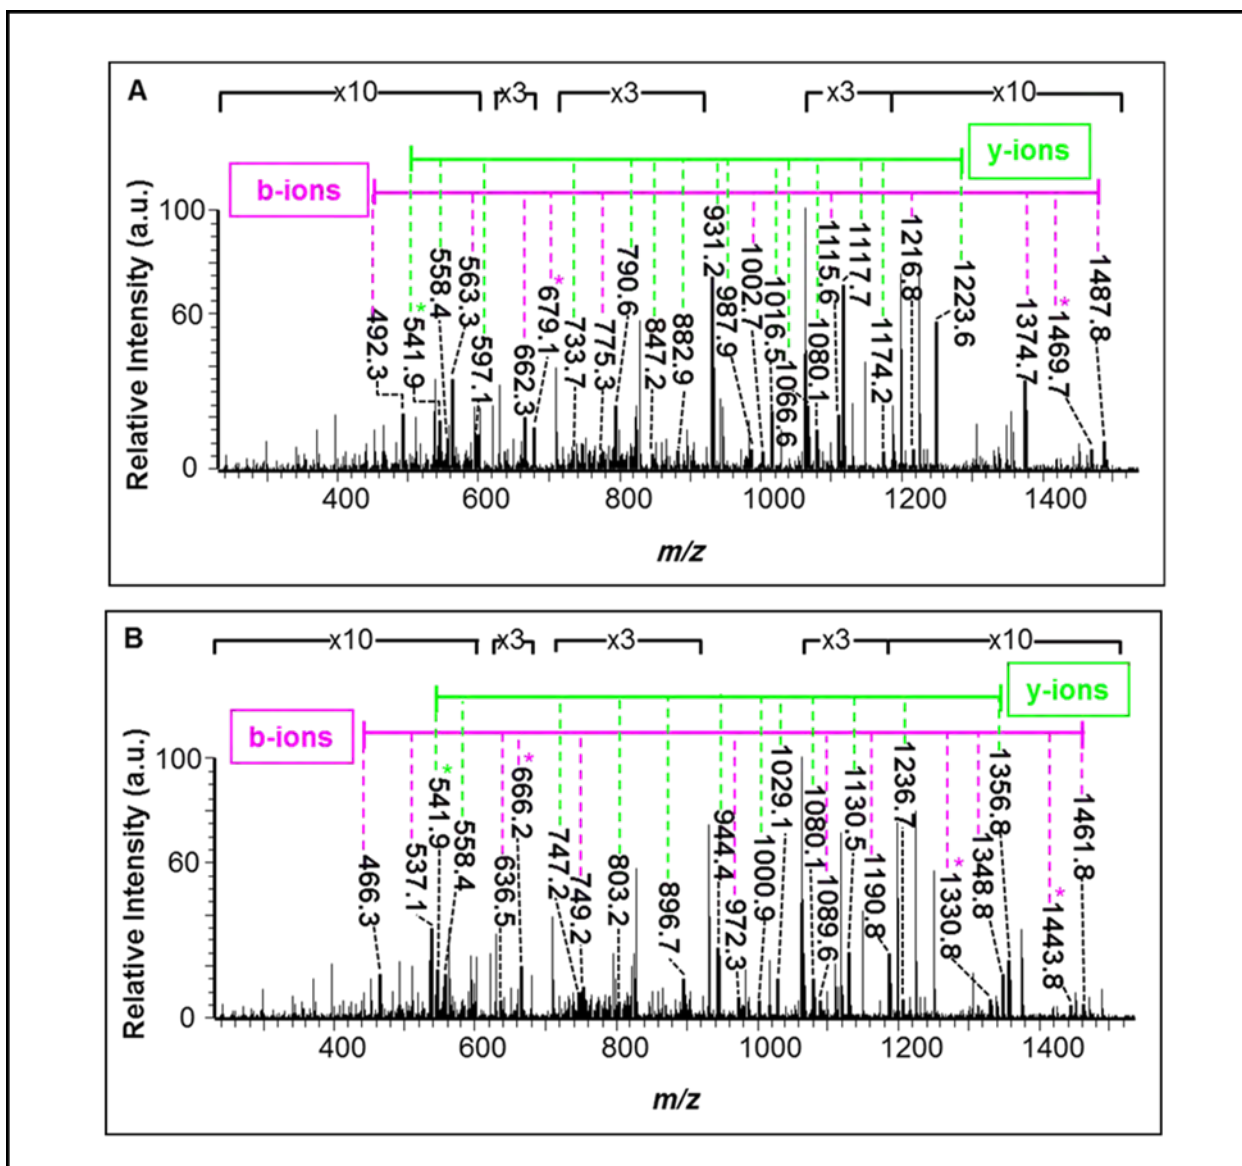

**Fig. S15.** LC-MS<sup>2</sup> spectra of the precursor ion at  $m/z$  838 for  $[M_{P+O} + 4H]^{4+}$  at 9.5 min (Fig. S13). **(A)** corresponds to oleoylation at K21 and palmitoylation at K23. **(B)** corresponds to oleoylation at K23 and palmitoylation at K21. The  $y$ -type and  $b$ -type ions are shown on each spectrum. The peaks labelled with an asterisk represent:  $m/z$  621.5,  $[(b13 + H_2O) + 2H]^{2+}$ ;  $m/z$  1374.6,  $[(b15 - NH_3) + H]^+$ . Data are tabulated in Tables S21 and S22.

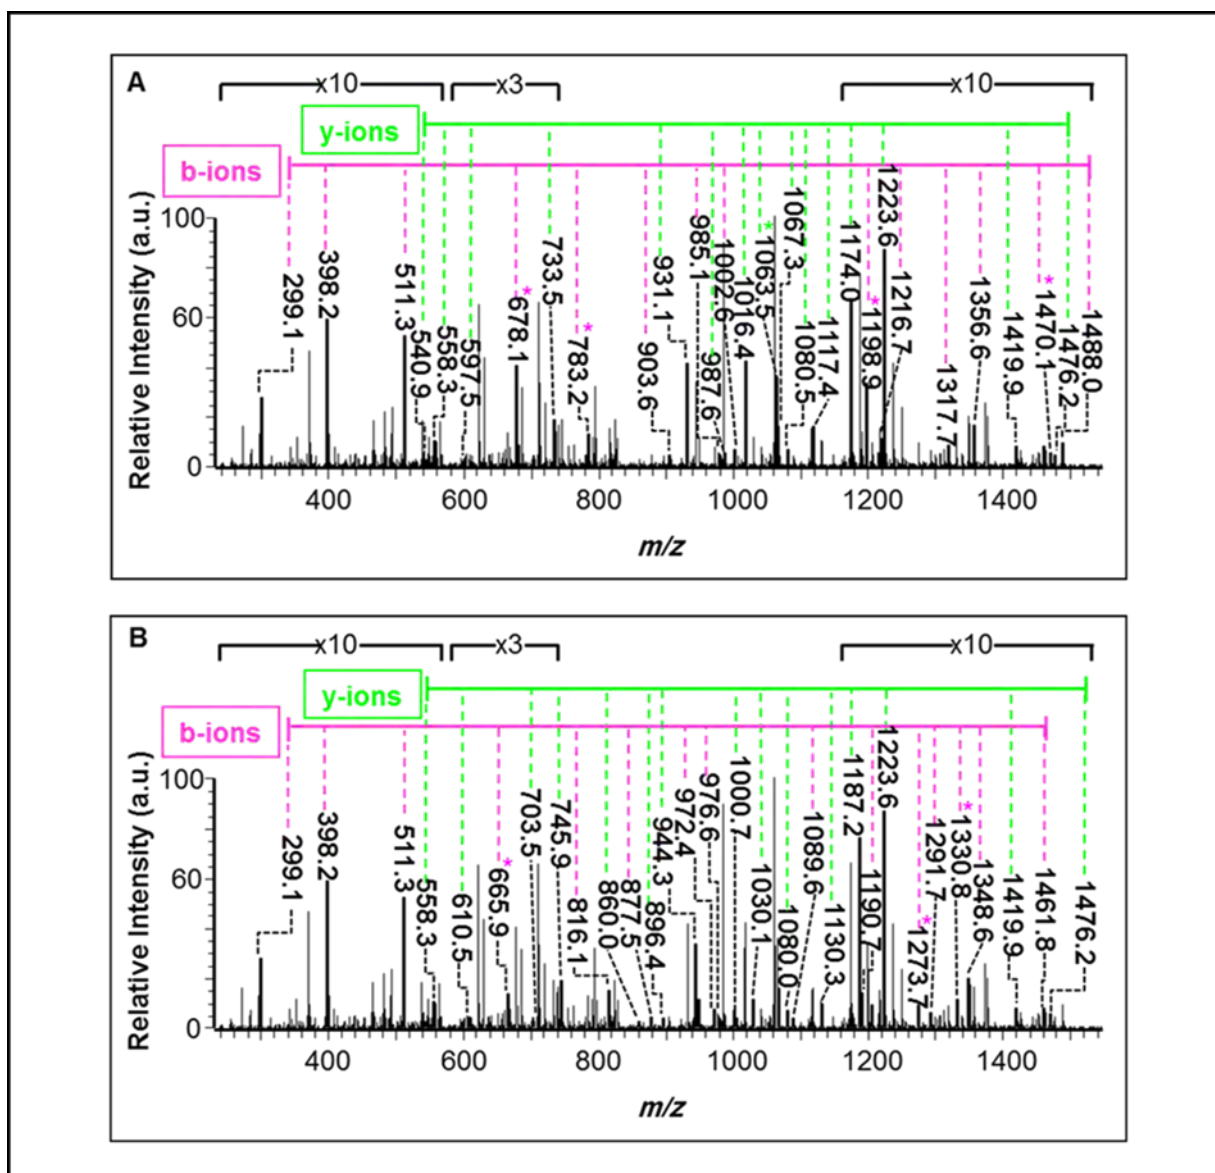

**Fig. S16.** LC-MS<sup>2</sup> spectra of the precursor ion at  $m/z$  838 for  $[M_{P+O} + 4H]^{4+}$  at 10.2 min (Fig. S13). **(A)** corresponds to oleoylation at K7 and palmitoylation at K21. **(B)** corresponds to oleoylation at K21 and palmitoylation at K7. The  $y$ -type and  $b$ -type ions are shown on each spectrum. The peaks labelled with an asterisk represent:  $m/z$  1198.9,  $[(b_{10O} - H_2O) + H]^+$ ;  $m/z$  1356.6,  $[(b_{12O} - H_2O) + H]^+$ ;  $m/z$  678.1,  $[(b_{12O} - H_2O) + 2H]^{2+}$ ;  $m/z$  1470.1,  $[(b_{13O} - H_2O) + H]^+$ ;  $m/z$  783.2,  $[(b_{14O} - H_2O) + H]^{2+}$ ;  $m/z$  1273.7,  $[(b_{11P} - H_2O) + H]^+$ ;  $m/z$  1330.8,  $[(b_{12P} - H_2O) + H]^+$ ;  $m/z$  665.9,  $[(b_{12P} - H_2O) + 2H]^{2+}$ ;  $m/z$  1063.5,  $[(y_{6O} - NH_3) + H]^+$ . Data are tabulated in Tables S25 and S26.

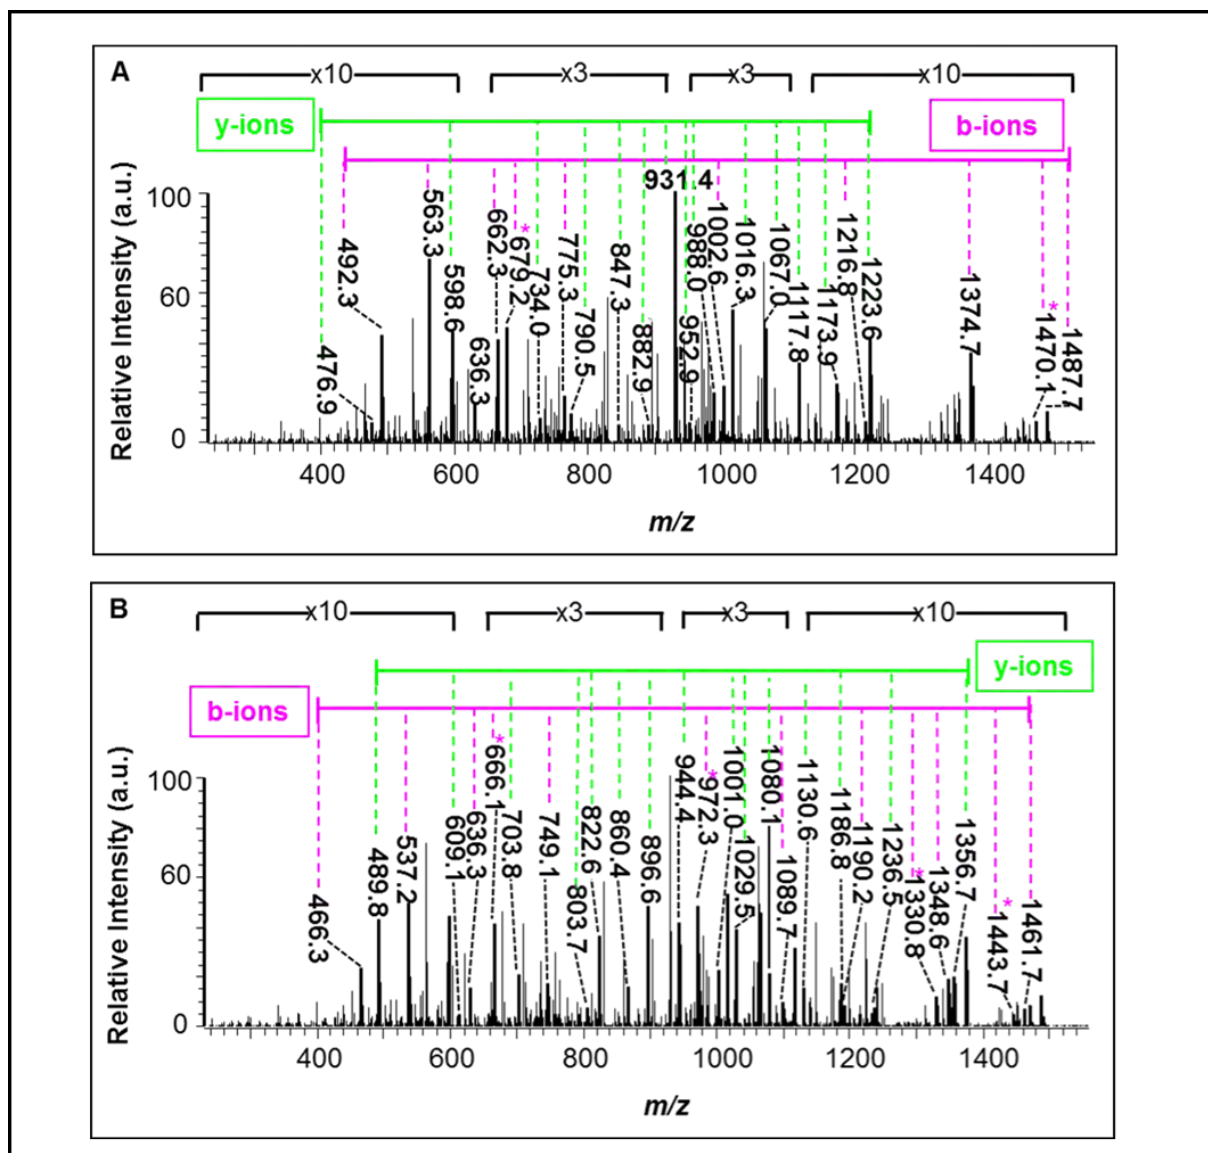

**Fig. S17.** LC-MS<sup>2</sup> spectra of the precursor ion at *m/z* 838 for [M<sub>P+O</sub> + 4H]<sup>4+</sup> at 10.6 min (Fig. S13). **(A)** corresponds to oleoylation at the *N*-terminus and palmitoylation at K23. **(B)** corresponds to oleoylation at K23 and palmitoylation at the *N*-terminus. The *y*-type and *b*-type ions are shown on each spectrum. The peaks labelled with an asterisk represent: *m/z* 679.2, [(b<sub>5O</sub> + H<sub>2</sub>O) + H]<sup>+</sup>; *m/z* 1470.1, [(b<sub>13O</sub> - H<sub>2</sub>O) + H]<sup>+</sup>; *m/z* 1330.8, [(b<sub>12P</sub> - H<sub>2</sub>O) + H]<sup>+</sup>; *m/z* 666.1, [(b<sub>12P</sub> - H<sub>2</sub>O) + 2H]<sup>2+</sup>; *m/z* 1443.7, [(b<sub>13P</sub> - H<sub>2</sub>O) + H]<sup>+</sup>; *m/z* 779.7, [(y<sub>4P</sub> - NH<sub>3</sub>) + H]<sup>+</sup>. Data are tabulated in Tables S27 and S28.

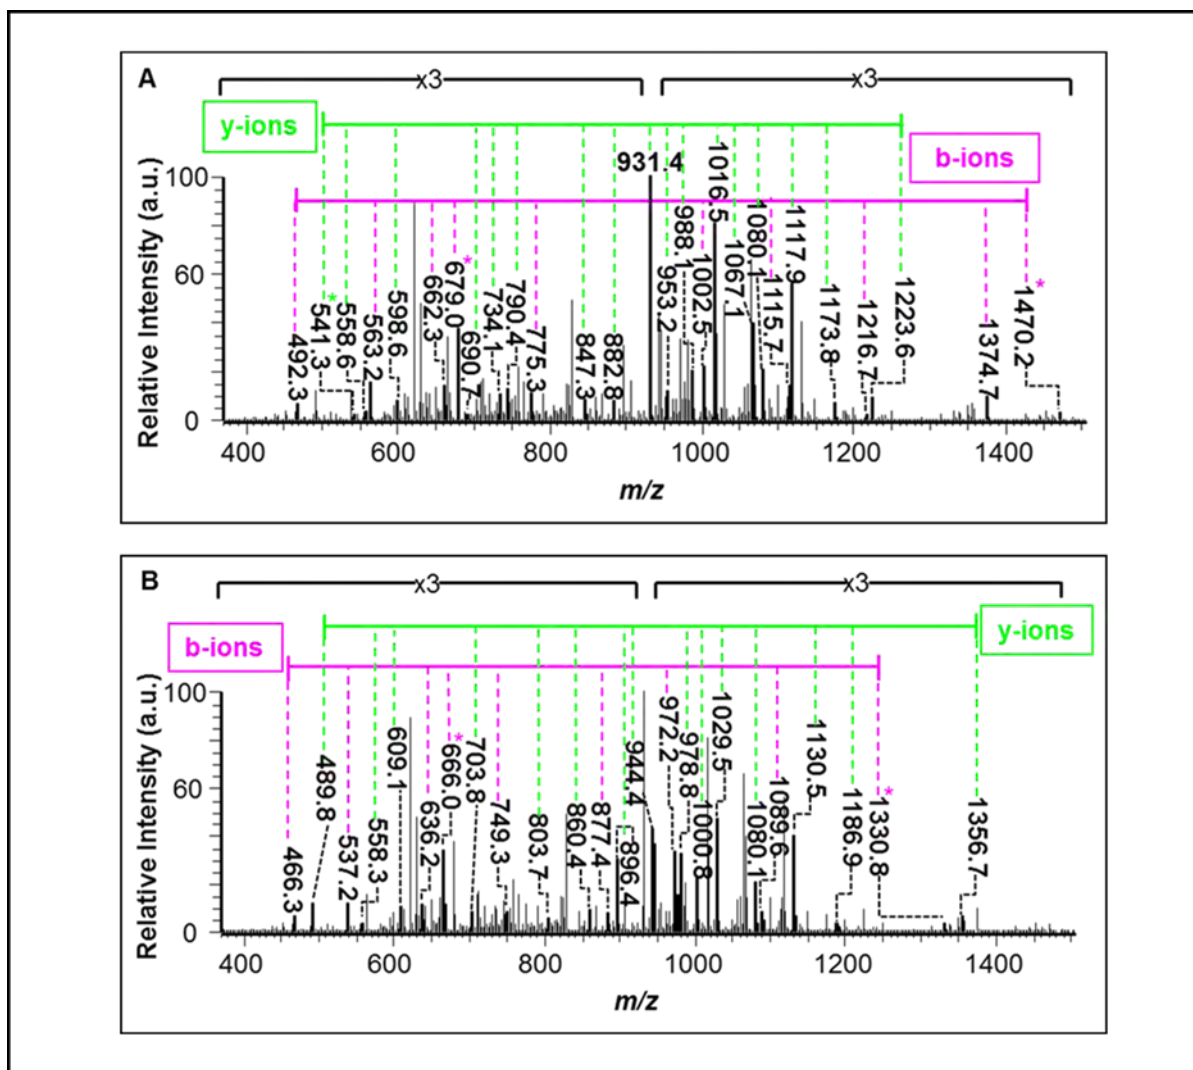

**Fig. S18.** LC-MS<sup>2</sup> spectra of the precursor ion at  $m/z$  838 for  $[M_{P+O} + 4H]^{4+}$  at 10.9 min (Fig. S13). **(A)** corresponds to oleoylation at the *N*-terminus and palmitoylation at R22. **(B)** corresponds to oleoylation at R22 and palmitoylation at the *N*-terminus. The *y*-type and *b*-type ions are shown on each spectrum. The peaks labelled with an asterisk represent:  $m/z$  679.0,  $[(b_{5O} + H_2O) + H]^+$ ;  $m/z$  1470.2,  $[(b_{13O} - H_2O) + H]^+$ ;  $m/z$  1330.8,  $[(b_{12P} - H_2O) + H]^+$ ;  $m/z$  666.0,  $[(b_{12P} - H_2O) + 2H]^{2+}$ ;  $m/z$  541.3,  $[(y_4 - NH_3) + H]^+$ . Data are tabulated in Tables S29 and S30.

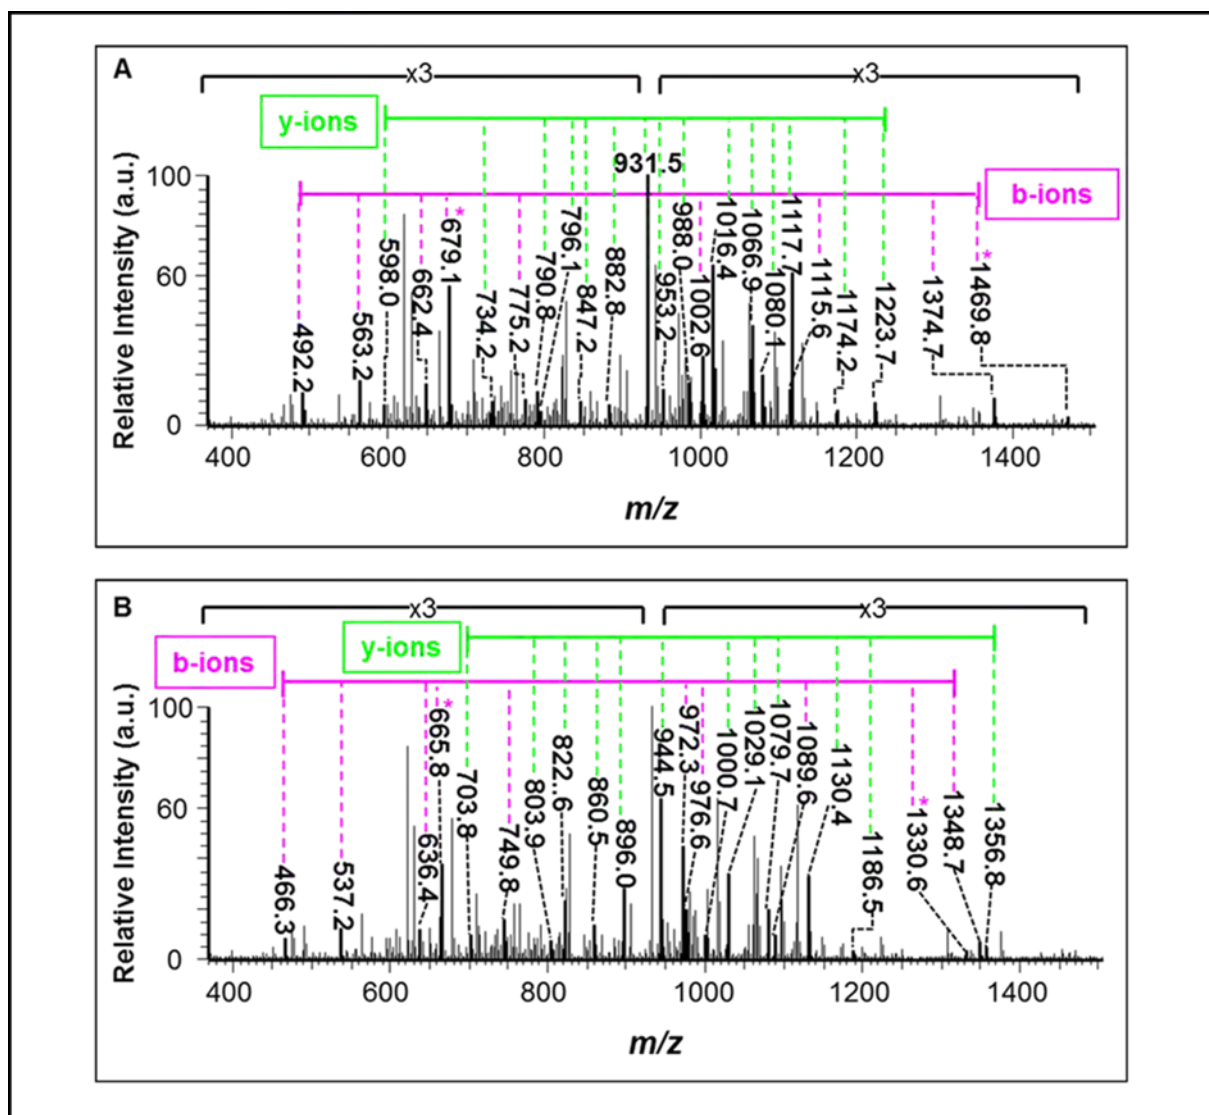

**Fig. S19.** LC-MS<sup>2</sup> spectra of the precursor ion at *m/z* 838 for [M<sub>P+O</sub> + 4H]<sup>4+</sup> at 11.2 min (Fig. S13). **(A)** corresponds to oleoylation at the *N*-terminus and palmitoylation at R24. **(B)** corresponds to oleoylation at R24 and palmitoylation at the *N*-terminus. The *y*-type and *b*-type ions are shown on each spectrum. The labelled peak with the asterisk represent: *m/z* 679.1, [(b<sub>5O</sub> + H<sub>2</sub>O) + H]<sup>+</sup>; *m/z* 1469.8, [(b<sub>13P</sub> - H<sub>2</sub>O) + H]<sup>+</sup>; *m/z* 1330.8, [(b<sub>12P</sub> - H<sub>2</sub>O) + H]<sup>+</sup>; *m/z* 665.8, [(b<sub>12P</sub> - H<sub>2</sub>O) + 2H]<sup>2+</sup>; *m/z* 779.5, [(y<sub>4P</sub> - NH<sub>3</sub>) + H]<sup>+</sup>. Data are tabulated in Tables S31 and S32.

## Supporting Information: Other Figures

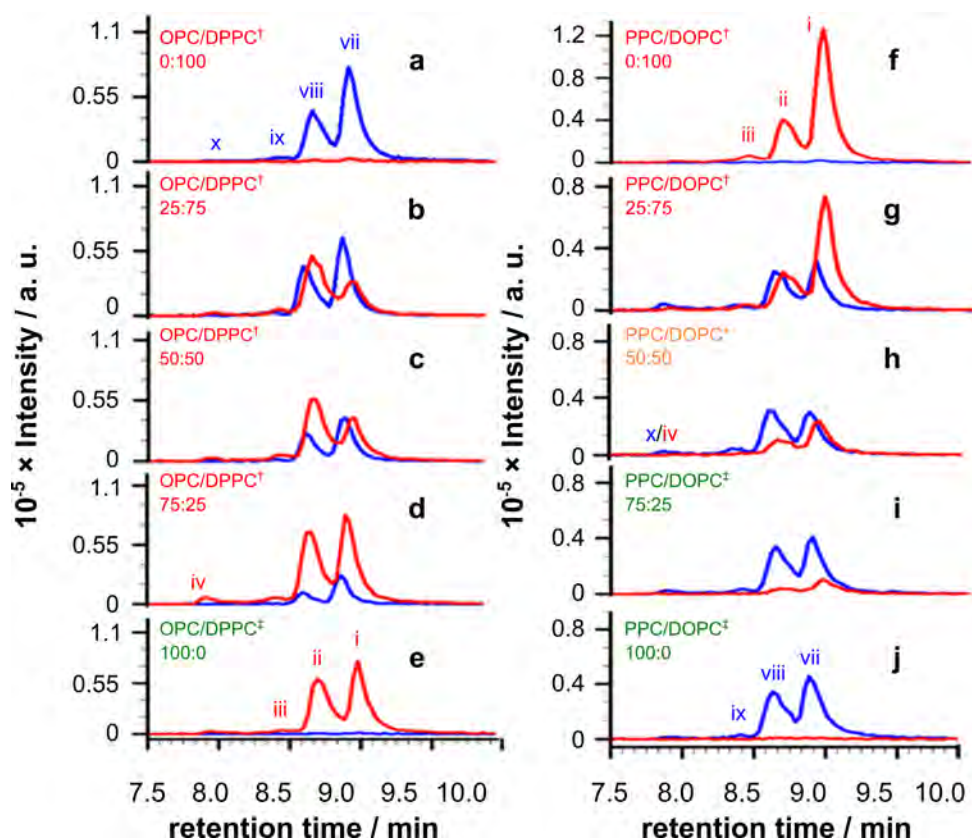

**Fig. S20.** EICs for  $m/z$  772.00 and 778.51, corresponding to palmitoyl and oleoyl melittin respectively ( $z = 4$ ), from LC-MS analyses of synthetic melittin incubated for 48 h with mixtures of lysolipid and lipid at 37 °C in buffer (10 mM  $\text{NaHCO}_3$ /90 mM NaCl) at pH 7.4. a) to e) DPPC + OPC; f) to j) DOPC + PPC. The initial molar ratio of lysolipid to lipid is indicated on each trace. Ratios indicated with a dagger ( $\dagger$ ) are bilayer  $\pm$  lysolipid; those indicated with an asterisk ( $*$ ) are mixed bilayer/detergent systems; those indicated with a double dagger ( $\ddagger$ ) are micelles (on the basis of literature precedents).<sup>1-4</sup> Peak annotations are identified in Figs. 2 and 3 in the main article.



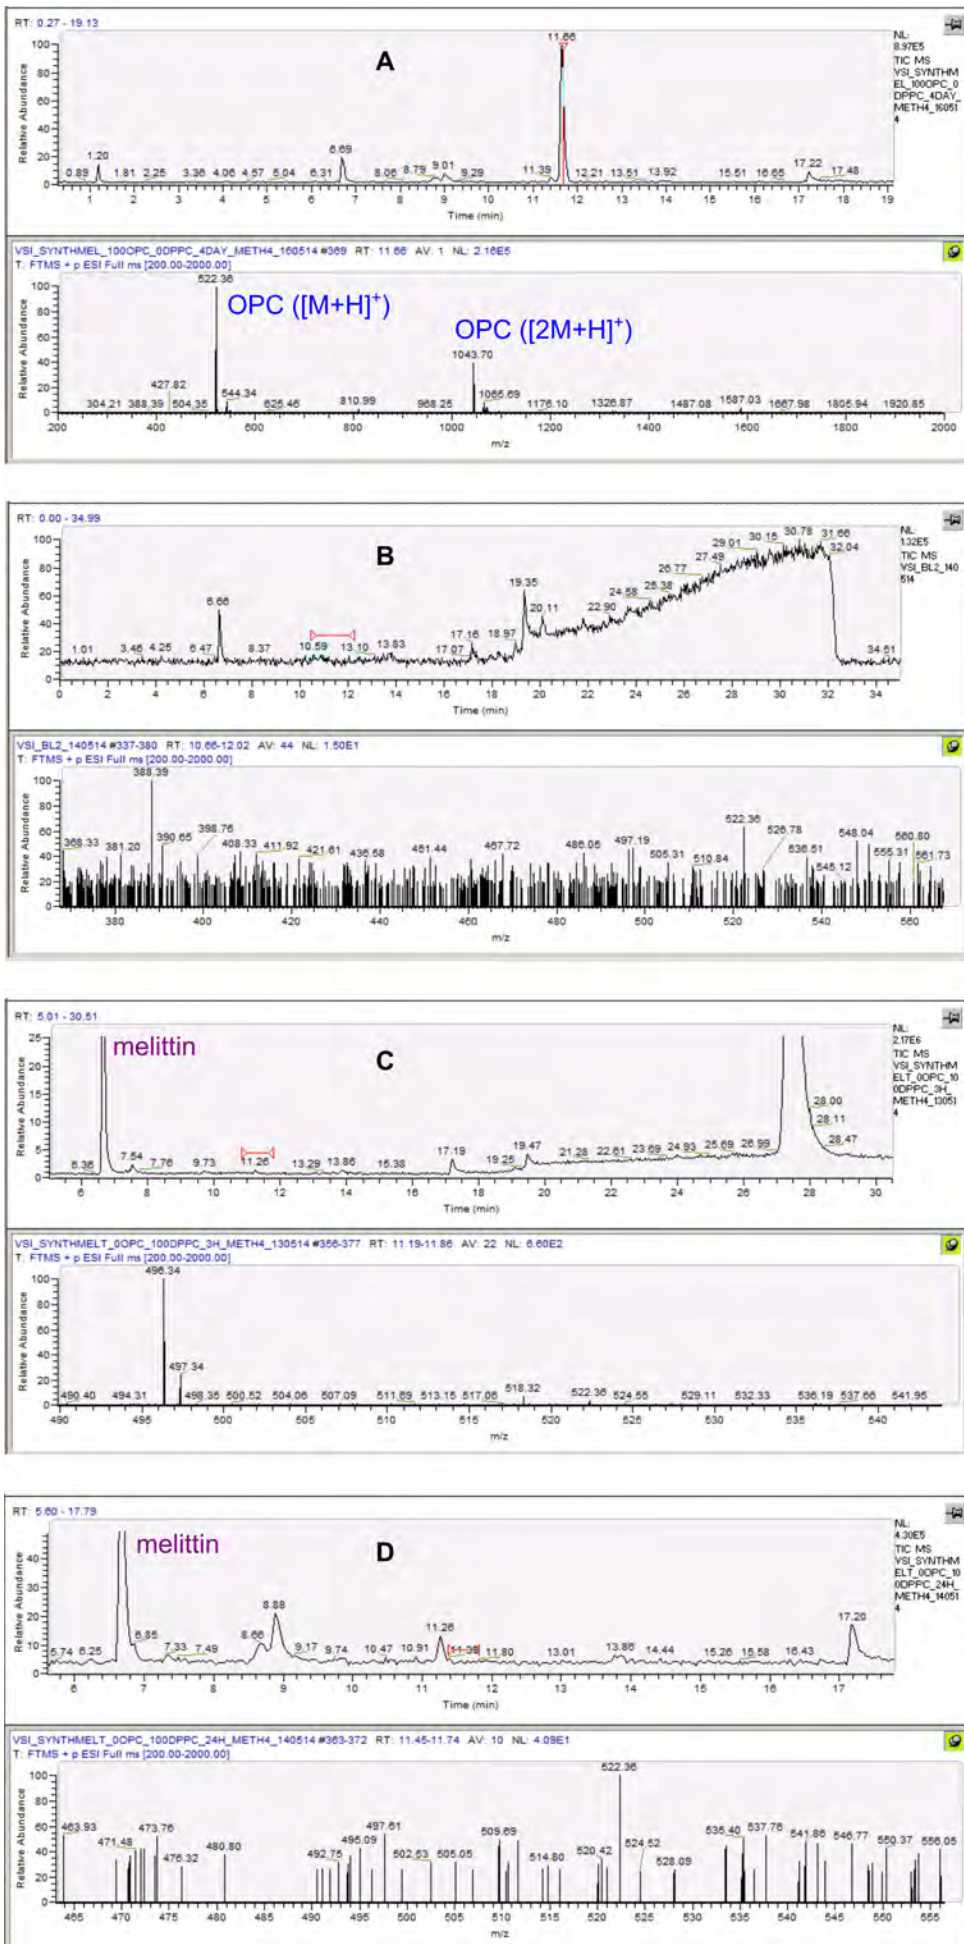

**Fig. S21.** LC-MS analyses for authentic OPC, and mixtures of DPPC liposomes with melittin. **A** is an authentic sample of OPC; **B** is a blank run; **C** is 3 h following the addition of melittin to DPPC; **D** is 24 h after the addition of DPPC to melittin. Both **C** and **D** show the presence of OPC at levels higher than the blank run, suggesting a small amount of OPC contamination in the sample.



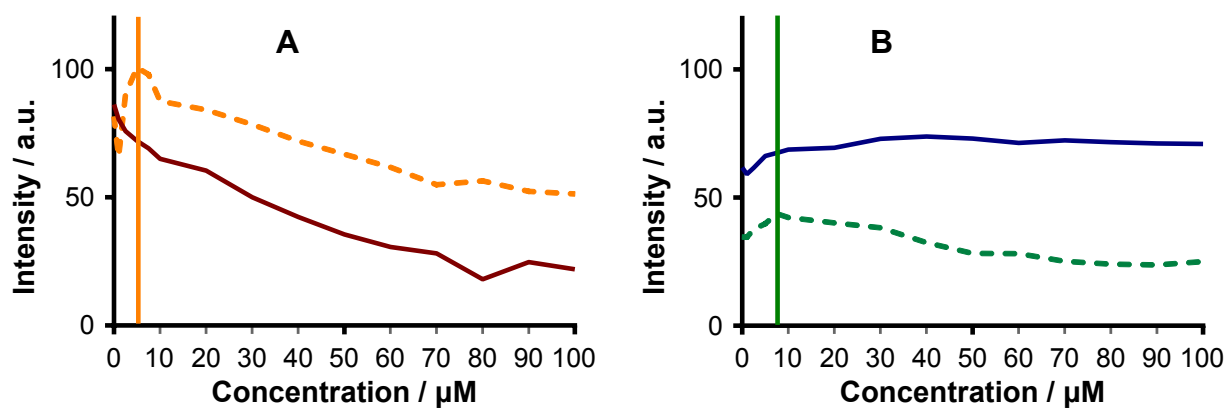

**Fig. S22.** Rhodamine 6G emission at 550 nm in the presence of increasing concentrations of lipidated melittin (1–100  $\mu\text{M}$ ) in water. **A.** *N*-palmitoyl melittin (solid red); K23-palmitoyl melittin (dashed orange). The vertical line denotes the CMC of K23-palmitoyl melittin at approximately 5  $\mu\text{M}$ . **B.** *N*-oleoyl melittin (solid blue); K23-oleoyl melittin (dashed green). The vertical line indicates the CMC of K23-oleoyl melittin at approximately 7.5  $\mu\text{M}$ .

## Supporting Information: Tables

**Table S1. Oleoylated melittin species observed in a mixture of melittin and OPC incubated at 37 °C over 168 h.**

| <sup>1</sup> H-GIGAVLKVLTTGLPALISWIKRKRQQ-NH <sub>2</sub> <sup>26</sup> |                              |          |          |             |                                                     |                                                  |
|-------------------------------------------------------------------------|------------------------------|----------|----------|-------------|-----------------------------------------------------|--------------------------------------------------|
| <i>m/z</i> Theor <sup>‡</sup>                                           | <i>m/z</i> Meas <sup>‡</sup> | <i>z</i> | RT (min) | Error (ppm) | Peak Area / 10 <sup>5</sup> (a.u. min) <sup>§</sup> | Assignment                                       |
| 1037.3404                                                               | 1037.3416                    | 3        | 8.6      | 1.16        | 121 ± 79                                            | [1-26] + 1 × (C18:1) / Single Oleoylation        |
| 778.2572                                                                | 778.2581                     | 4        | 8.6      | 1.16        | 422 ± 268                                           | [1-26] + 1 × (C18:1) / Single Oleoylation        |
| 622.8072                                                                | 622.8076                     | 5        | 8.6      | 0.64        | 355 ± 229                                           | [1-26] + 1 × (C18:1) / Single Oleoylation        |
| 1125.4222                                                               | 1125.4241                    | 3        | 11.1     | 1.69        | 93 ± 76                                             | [1-26] + 2 × (C18:1) / Double Oleoylation        |
| 844.3185                                                                | 844.3196                     | 4        | 11.1     | 1.30        | 432 ± 346                                           | [1-26] + 2 × (C18:1) / Double Oleoylation        |
| 675.6562                                                                | 675.6574                     | 5        | 11.2     | 1.78        | 46 ± 35                                             | [1-26] + 2 × (C18:1) / Double Oleoylation        |
| 1125.4222                                                               | 1125.4231                    | 3        | 17.8     | 0.80        | 0.7 ± 0.2                                           | [1-26] + 2 × (C18:1) / Labile Triple Oleoylation |
| 844.3185                                                                | 844.3192                     | 4        | 17.8     | 0.83        | 6 ± 2                                               | [1-26] + 2 × (C18:1) / Labile Triple Oleoylation |
| 675.6562                                                                | 675.6555                     | 5        | 17.8     | -1.04       | 0.4 ± 0.1                                           | [1-26] + 2 × (C18:1) / Labile Triple Oleoylation |
| 1213.5040                                                               | 1213.5055                    | 3        | 18.2     | 1.24        | 0.5 ± 0.3                                           | [1-26] + 3 × (C18:1) / Triple Oleoylation        |
| 910.3798                                                                | 910.3790                     | 4        | 18.2     | -0.90       | 1.5 ± 0.5                                           | [1-26] + 3 × (C18:1) / Triple Oleoylation        |

<sup>‡</sup> Both theoretical (Theor) and measured (Meas) *m/z* values are for the monoisotopic peak. Theoretical masses were obtained from mMass software (V5.5).

<sup>§</sup> Errors are reported as the standard error of the mean (SEM) of the peak area (A), *n*=3.

**Table S2. Palmitoylated melittin species observed in a mixture of melittin and PPC incubated at 37 °C over 168 h.**

| <sup>1</sup> H-GIGAVLKVLTTGLPALISWIKRKRQQ-NH <sub>2</sub> <sup>26</sup> |                              |          |          |             |                                                     |                                                     |
|-------------------------------------------------------------------------|------------------------------|----------|----------|-------------|-----------------------------------------------------|-----------------------------------------------------|
| <i>m/z</i> Theor <sup>‡</sup>                                           | <i>m/z</i> Meas <sup>‡</sup> | <i>z</i> | RT (min) | Error (ppm) | Peak Area / 10 <sup>5</sup> (a.u. min) <sup>§</sup> | Assignment                                          |
| 1028.6686                                                               | 1028.6675                    | 3        | 8.8      | -1.07       | 43 ± 42                                             | [1-26] + 1 × (C16:0) / Single Palmitoylation        |
| 771.7532                                                                | 771.7540                     | 4        | 8.9      | 1.04        | 102 ± 96                                            | [1-26] + 1 × (C16:0) / Single Palmitoylation        |
| 617.6040                                                                | 617.6046                     | 5        | 8.9      | 0.97        | 59 ± 55                                             | [1-26] + 1 × (C16:0) / Single Palmitoylation        |
| 1108.0784                                                               | 1108.0837                    | 3        | 11.3     | 4.78        | 0.1 ± 0.04                                          | [1-26] + 2 × (C16:0) / Double Palmitoylation        |
| 831.3107                                                                | 831.3134                     | 4        | 11.2     | 3.25        | 0.7 ± 0.1                                           | [1-26] + 2 × (C16:0) / Double Palmitoylation        |
| 1108.0784                                                               | 1108.0756                    | 3        | 17.7     | -2.52       | 0.1 ± 0.1                                           | [1-26] + 2 × (C16:0) / Labile Triple Palmitoylation |
| 831.3107                                                                | 831.3109                     | 4        | 17.7     | 0.24        | 1 ± 0.7                                             | [1-26] + 2 × (C16:0) / Labile Triple Palmitoylation |

<sup>‡</sup> Both theoretical and measured *m/z* values are for monoisotopic peak. Theoretical mass obtained from mMass software (V5.5).

<sup>§</sup> Errors are reported as SEM of peak area (*n*=2).

**Table S3. Acylated species observed in a mixture of melittin with PPC:DOPC (1:1) after incubation at 37 °C for 168 h.**

| <sup>1</sup> H-GIGAVLKVLTTGLPALISWIKRKRQQ-NH <sub>2</sub> <sup>26</sup> |                              |          |          |             |                                                     |                                                                                 |
|-------------------------------------------------------------------------|------------------------------|----------|----------|-------------|-----------------------------------------------------|---------------------------------------------------------------------------------|
| <i>m/z</i> Theor <sup>‡</sup>                                           | <i>m/z</i> Meas <sup>‡</sup> | <i>z</i> | RT (min) | Error (ppm) | Peak Area / 10 <sup>4</sup> (a.u. min) <sup>§</sup> | Assignment                                                                      |
| 1037.3404                                                               | 1037.3423                    | 3        | 8.9      | 1.83        | 55 ± 16                                             | [1-26] + 1 × (C18:1) / Single Oleoylation                                       |
| 778.2572                                                                | 778.2580                     | 4        | 8.9      | 1.03        | 266 ± 57                                            | [1-26] + 1 × (C18:1) / Single Oleoylation                                       |
| 622.8072                                                                | 622.8076                     | 5        | 8.9      | 0.64        | 137 ± 121                                           | [1-26] + 1 × (C18:1) / Single Oleoylation                                       |
| 1028.6686                                                               | 1028.6689                    | 3        | 8.5      | 0.29        | 63 ± 22                                             | [1-26] + 1 × (C16:0) / Single Palmitoylation                                    |
| 771.7532                                                                | 771.7532                     | 4        | 8.5      | 0.00        | 260 ± 42                                            | [1-26] + 1 × (C16:0) / Single Palmitoylation                                    |
| 617.6040                                                                | 617.6048                     | 5        | 8.5      | 1.30        | 238 ± 56                                            | [1-26] + 1 × (C16:0) / Single Palmitoylation                                    |
| 1125.4222                                                               | 1125.4205                    | 3        | 11.0     | -1.51       | 31 ± 15                                             | [1-26] + 2 × (C18:1) / Double Oleoylation                                       |
| 844.3185                                                                | 844.3196                     | 4        | 11.0     | 1.30        | 129 ± 37                                            | [1-26] + 2 × (C18:1) / Double Oleoylation                                       |
| 675.6562                                                                | 675.6562                     | 5        | 10.9     | 0.00        | 21 ± 6                                              | [1-26] + 2 × (C18:1) / Double Oleoylation                                       |
| 1108.0784                                                               | 1108.0811                    | 3        | 11.0     | 2.44        | 46 ± 17                                             | [1-26] + 2 × (C16:0) / Double Palmitoylation                                    |
| 831.3107                                                                | 831.3117                     | 4        | 10.9     | 1.20        | 168 ± 48                                            | [1-26] + 2 × (C16:0) / Double Palmitoylation                                    |
| 665.2500                                                                | 665.2509                     | 5        | 10.9     | 1.35        | 38 ± 8                                              | [1-26] + 2 × (C16:0) / Double Palmitoylation                                    |
| 1116.7503                                                               | 1116.7489                    | 3        | 11.0     | -1.25       | 78 ± 29                                             | [1-26] + 1 × (C16:0) + 1 × (C18:1) / Palmitoylation + Oleoylation               |
| 837.8146                                                                | 837.8157                     | 4        | 10.9     | 1.31        | 273 ± 62                                            | [1-26] + 1 × (C16:0) + 1 × (C18:1) / Palmitoylation + Oleoylation               |
| 670.4531                                                                | 670.4540                     | 5        | 10.8     | 1.34        | 67 ± 19                                             | [1-26] + 1 × (C16:0) + 1 × (C18:1) / Palmitoylation + Oleoylation               |
| 1125.4222                                                               | 1125.4242                    | 3        | 17.8     | 1.78        | 0.3 ± 0.2                                           | [1-26] + 2 × (C18:1) / Labile Triple Oleoylation                                |
| 844.3185                                                                | 844.3190                     | 4        | 17.8     | 0.59        | 5 ± 4                                               | [1-26] + 2 × (C18:1) / Labile Triple Oleoylation                                |
| 1108.0784                                                               | 1108.0554                    | 3        | 17.7     | -20.76      | 1 ± 0.4                                             | [1-26] + 2 × (C16:0) / Labile Triple Palmitoylation                             |
| 831.3107                                                                | 831.3108                     | 4        | 17.8     | 0.12        | 6 ± 5                                               | [1-26] + 2 × (C16:0) / Labile Triple Palmitoylation                             |
| 1116.7503                                                               | 1116.7476                    | 3        | 17.7     | -2.42       | 1.5 ± 1                                             | [1-26] + 1 × (C16:0) + 1 × (C18:1) / Labile (Palmitoylation + Oleoylation)      |
| 837.8146                                                                | 837.8159                     | 4        | 17.7     | 1.55        | 12 ± 9                                              | [1-26] + 1 × (C16:0) + 1 × (C18:1) / Labile (Palmitoylation + Oleoylation)      |
| 670.4531                                                                | 670.4553                     | 5        | 17.8     | 3.28        | 0.5 ± 0.2                                           | [1-26] + 1 × (C16:0) + 1 × (C18:1) / Labile (Palmitoylation + Oleoylation)      |
| 1213.5040                                                               | 1213.5038                    | 3        | 18.18    | -0.16       | 1 ± 1                                               | [1-26] + 3 × (C18:1) / Triple Oleoylation                                       |
| 910.3798                                                                | 910.3758                     | 4        | 18.09    | -4.39       | 2 ± 2                                               | [1-26] + 3 × (C18:1) / Triple Oleoylation                                       |
| 1187.4883                                                               | 1187.4899                    | 3        | 18.15    | 1.35        | 1 ± 1                                               | [1-26] + 3 × (C16:0) / Triple Palmitoylation                                    |
| 890.8681                                                                | 890.8683                     | 4        | 18.21    | 0.22        | 4 ± 3                                               | [1-26] + 3 × (C16:0) / Triple Palmitoylation                                    |
| 1204.8321                                                               | 1204.8300                    | 3        | 18.18    | -1.74       | 2.5 ± 2                                             | [1-26] + 2 × (C18:1) + 1 × (C16:0) / Double Oleoylation + Single Palmitoylation |
| 903.8759                                                                | 903.8759                     | 4        | 18.12    | 0.00        | 8 ± 7.5                                             | [1-26] + 2 × (C18:1) + 1 × (C16:0) / Double Oleoylation + Single Palmitoylation |
| 1196.1602                                                               | 1196.1633                    | 3        | 18.18    | 2.59        | 2 ± 2                                               | [1-26] + 2 × (C16:0) + 1 × (C18:1) / Double Palmitoylation + Single Oleoylation |
| 897.3720                                                                | 897.3736                     | 4        | 18.21    | 1.78        | 10 ± 9                                              | [1-26] + 2 × (C16:0) + 1 × (C18:1) / Double Palmitoylation + Single Oleoylation |

<sup>‡</sup> Both theoretical and measured *m/z* values are for the monoisotopic peak. Theoretical mass obtained from mMass software (V5.5).

<sup>§</sup> Errors are reported as SEM of peak area (*n*=2).

**Table S4. Acylated species observed in a mixture of melittin with OPC:DPPC (1:1) after incubation at 37 °C for 168 h.**

| <sup>1</sup> H-GIGAVLKVLTTGLPALISWIKRKRQQ-NH <sub>2</sub> <sup>26</sup> |                              |          |          |             |                                                     |                                                                                 |
|-------------------------------------------------------------------------|------------------------------|----------|----------|-------------|-----------------------------------------------------|---------------------------------------------------------------------------------|
| <i>m/z</i> Theor <sup>‡</sup>                                           | <i>m/z</i> Meas <sup>‡</sup> | <i>z</i> | RT (min) | Error (ppm) | Peak Area / 10 <sup>4</sup> (a.u. min) <sup>§</sup> | Assignment                                                                      |
| 1037.3404                                                               | 1037.3405                    | 3        | 8.6      | 0.09        | 144 ± 67                                            | [1-26] + 1 × (C18:1) / Single Oleoylation                                       |
| 778.2572                                                                | 778.2585                     | 4        | 8.6      | 1.67        | 660 ± 307                                           | [1-26] + 1 × (C18:1) / Single Oleoylation                                       |
| 622.8072                                                                | 622.8077                     | 5        | 8.6      | 0.80        | 479 ± 159                                           | [1-26] + 1 × (C18:1) / Single Oleoylation                                       |
| 1028.6686                                                               | 1028.6687                    | 3        | 8.5      | 0.10        | 85 ± 33                                             | [1-26] + 1 × (C16:0) / Single Palmitoylation                                    |
| 771.7532                                                                | 771.7542                     | 4        | 8.5      | 1.30        | 364 ± 102                                           | [1-26] + 1 × (C16:0) / Single Palmitoylation                                    |
| 617.6040                                                                | 617.6046                     | 5        | 8.5      | 0.97        | 270 ± 48                                            | [1-26] + 1 × (C16:0) / Single Palmitoylation                                    |
| 1125.4222                                                               | 1125.4232                    | 3        | 11.0     | 0.89        | 24 ± 15                                             | [1-26] + 2 × (C18:1) / Double Oleoylation                                       |
| 844.3185                                                                | 844.3193                     | 4        | 10.9     | 0.95        | 282 ± 30                                            | [1-26] + 2 × (C18:1) / Double Oleoylation                                       |
| 675.6562                                                                | 675.6549                     | 5        | 10.9     | -1.92       | 35 ± 19                                             | [1-26] + 2 × (C18:1) / Double Oleoylation                                       |
| 1108.0784                                                               | 1108.0789                    | 3        | 11.0     | 0.45        | 19 ± 9                                              | [1-26] + 2 × (C16:0) / Double Palmitoylation                                    |
| 831.3107                                                                | 831.3115                     | 4        | 10.9     | 0.96        | 88 ± 53                                             | [1-26] + 2 × (C16:0) / Double Palmitoylation                                    |
| 665.2500                                                                | 665.2499                     | 5        | 10.9     | -0.15       | 12 ± 9.5                                            | [1-26] + 2 × (C16:0) / Double Palmitoylation                                    |
| 1116.7503                                                               | 1116.7505                    | 3        | 11.0     | 0.18        | 55 ± 16                                             | [1-26] + 1 × (C16:0) + 1 × (C18:1) / Palmitoylation + Oleoylation               |
| 837.8146                                                                | 837.8159                     | 4        | 10.9     | 1.55        | 249 ± 114                                           | [1-26] + 1 × (C16:0) + 1 × (C18:1) / Palmitoylation + Oleoylation               |
| 670.4531                                                                | 670.4542                     | 5        | 10.9     | 1.64        | 44 ± 29                                             | [1-26] + 1 × (C16:0) + 1 × (C18:1) / Palmitoylation + Oleoylation               |
| 1125.4222                                                               | 1125.4195                    | 3        | 17.7     | -2.40       | 1 ± 0.1                                             | [1-26] + 2 × (C18:1) + / Labile Triple Oleoylation                              |
| 844.3185                                                                | 844.3195                     | 4        | 17.7     | 1.18        | 14 ± 0.1                                            | [1-26] + 2 × (C18:1) + / Labile Triple Oleoylation                              |
| 831.3107                                                                | 831.3134                     | 4        | 17.7     | 3.25        | 4 ± 2                                               | [1-26] + 2 × (C16:0) + / Labile Triple Palmitoylation                           |
| 1116.7503                                                               | 1116.7491                    | 3        | 17.7     | -1.07       | 2 ± 1                                               | [1-26] + 1 × (C16:0) + 1 × (C18:1) / Labile (Palmitoylation + Oleoylation)      |
| 837.8146                                                                | 837.8154                     | 4        | 17.7     | 0.95        | 15 ± 4                                              | [1-26] + 1 × (C16:0) + 1 × (C18:1) / Labile (Palmitoylation + Oleoylation)      |
| 670.4531                                                                | 670.4537                     | 5        | 17.8     | 0.89        | 1 ± 0.2                                             | [1-26] + 1 × (C16:0) + 1 × (C18:1) / Labile (Palmitoylation + Oleoylation)      |
| 1213.504                                                                | 1213.5011                    | 3        | 18.2     | -2.39       | 3 ± 1                                               | [1-26] + 3 × (C18:1) / Triple Oleoylation                                       |
| 910.3798                                                                | 910.3813                     | 4        | 18.2     | 1.65        | 10 ± 3                                              | [1-26] + 3 × (C18:1) / Triple Oleoylation                                       |
| 1187.4883                                                               | 1187.4921                    | 3        | 18.2     | 3.20        | 0.6 ± 0.4                                           | [1-26] + 3 × (C16:0) / Triple Palmitoylation                                    |
| 890.8681                                                                | 890.8680                     | 4        | 18.1     | -0.11       | 3 ± 2                                               | [1-26] + 3 × (C16:0) / Triple Palmitoylation                                    |
| 1204.8321                                                               | 1204.8315                    | 3        | 18.2     | -0.50       | 6 ± 4                                               | [1-26] + 2 × (C18:1) + 1 × (C16:0) / Double Oleoylation + Single Palmitoylation |
| 903.8759                                                                | 903.8751                     | 4        | 18.2     | -0.89       | 17 ± 13.5                                           | [1-26] + 2 × (C18:1) + 1 × (C16:0) / Double Oleoylation + Single Palmitoylation |
| 1196.1602                                                               | 1196.1632                    | 3        | 18.2     | 2.51        | 4 ± 3                                               | [1-26] + 2 × (C16:0) + 1 × (C18:1) / Double Palmitoylation + Single Oleoylation |
| 897.3720                                                                | 897.3710                     | 4        | 18.2     | -1.11       | 13 ± 10                                             | [1-26] + 2 × (C16:0) + 1 × (C18:1) / Double Palmitoylation + Single Oleoylation |

<sup>‡</sup> Both theoretical and measured *m/z* values are monoisotopic. Theoretical mass obtained from mMass software (V5.5).

<sup>§</sup> Errors reported as the SEM of peak area (*n*=3).

**Table S5.** Ions produced by fragmenting double-palmitoylated melittin at  $m/z$  832 ( $z = 4$ ) at RT = 9.1 min of the EIC (see Fig. 3 and Fig. S5), LTQFT. Data are presented graphically in Fig. S6a.

| b-ions                | $m/z$  | $z$ | Sequence Ladder <sup>†</sup> | y-ions | $m/z$  | $z$ | Sequence Ladder <sup>†</sup>                   |
|-----------------------|--------|-----|------------------------------|--------|--------|-----|------------------------------------------------|
| b4                    | 299.1  | 1   | H-GIGA.v                     | y19    | 1342.5 | 2   | k.VLTTGLPALIS <b>WIKRKR</b> QQ-NH <sub>2</sub> |
| b5                    | 398.1  | 1   | H-GIGAV.I                    | y18    | 1293.2 | 2   | v.LTTGLPALIS <b>WIKRKR</b> QQ-NH <sub>2</sub>  |
| b6                    | 511.4  | 1   | H-GIGAVL.k                   | y17    | 1236.7 | 2   | I.TTGLPALIS <b>WIKRKR</b> QQ-NH <sub>2</sub>   |
| b8                    | 738.4  | 1   | H-GIGAVLK.V.I                | y16    | 1186.1 | 2   | t.TGLPALIS <b>WIKRKR</b> QQ-NH <sub>2</sub>    |
| b9                    | 851.5  | 1   | H-GIGAVLK.V.L.t              | y15    | 1135.5 | 2   | t.GLPALIS <b>WIKRKR</b> QQ-NH <sub>2</sub>     |
| b10                   | 953.0  | 1   | H-GIGAVLK.V.L.T.t            | y14    | 1107.1 | 2   | g.LPALIS <b>WIKRKR</b> QQ-NH <sub>2</sub>      |
| b12                   | 1110.6 | 1   | H-GIGAVLK.V.L.T.T.G.I        | y13    | 1050.5 | 2   | I.PALIS <b>WIKRKR</b> QQ-NH <sub>2</sub>       |
| b13                   | 1223.7 | 1   | H-GIGAVLK.V.L.T.T.G.L.p      | y12    | 1001.9 | 2   | p.ALIS <b>WIKRKR</b> QQ-NH <sub>2</sub>        |
| b13 +H <sub>2</sub> O | 621.4  | 2   | H-GIGAVLK.V.L.T.T.G.L.p      | y10    | 910.3  | 2   | I.I <b>SWIKRKR</b> QQ-NH <sub>2</sub>          |
|                       |        |     |                              | y9     | 853.6  | 2   | i. <b>SWIKRKR</b> QQ-NH <sub>2</sub>           |
|                       |        |     |                              | y7     | 598.1  | 2   | w. <b>KRKR</b> QQ-NH <sub>2</sub>              |
|                       |        |     |                              | y6     | 541.0  | 2   | i. <b>KRKR</b> QQ-NH <sub>2</sub>              |
|                       |        |     |                              | y5     | 357.7  | 2   | k. <b>RKR</b> QQ-NH <sub>2</sub>               |

<sup>†</sup> **Palmitoylation** sites within the amino acid sequence of the peptide are highlighted in **bold blue**.

**Table S6.** Ions produced by fragmenting double-palmitoylated melittin at  $m/z$  832 ( $z = 4$ ) at RT = 9.4 min of the EIC (see Fig. 3 and Fig. S5), LTQFT. Data are presented graphically in Fig. S6b.

| b-ions                | $m/z$  | $z$ | Sequence Ladder <sup>†</sup> | y-ions | $m/z$  | $z$ | Sequence Ladder <sup>†</sup>                   |
|-----------------------|--------|-----|------------------------------|--------|--------|-----|------------------------------------------------|
| b4                    | 299.3  | 1   | H-GIGA.v                     | y19    | 1342.9 | 2   | k.VLTTGLPALIS <b>WIKRKR</b> QQ-NH <sub>2</sub> |
| b5                    | 398.2  | 1   | H-GIGAV.I                    | y18    | 1293.1 | 2   | v.LTTGLPALIS <b>WIKRKR</b> QQ-NH <sub>2</sub>  |
| b6                    | 511.3  | 1   | H-GIGAVL.k                   | y17    | 1236.7 | 2   | I.TTGLPALIS <b>WIKRKR</b> QQ-NH <sub>2</sub>   |
| b8                    | 738.6  | 1   | H-GIGAVLK.V.I                | y16    | 1186.1 | 2   | t.TGLPALIS <b>WIKRKR</b> QQ-NH <sub>2</sub>    |
| b9                    | 851.6  | 1   | H-GIGAVLK.V.L.t              | y15    | 1135.5 | 2   | t.GLPALIS <b>WIKRKR</b> QQ-NH <sub>2</sub>     |
| b10                   | 952.9  | 1   | H-GIGAVLK.V.L.T.t            | y14    | 1106.8 | 2   | g.LPALIS <b>WIKRKR</b> QQ-NH <sub>2</sub>      |
| b12                   | 1110.7 | 1   | H-GIGAVLK.V.L.T.T.G.I        | y13    | 1050.2 | 2   | I.PALIS <b>WIKRKR</b> QQ-NH <sub>2</sub>       |
| b13                   | 1223.6 | 1   | H-GIGAVLK.V.L.T.T.G.L.p      | y12    | 1001.8 | 2   | p.ALIS <b>WIKRKR</b> QQ-NH <sub>2</sub>        |
| b13 +H <sub>2</sub> O | 621.5  | 2   | H-GIGAVLK.V.L.T.T.G.L.p      | y11    | 966.2  | 2   | a.LIS <b>WIKRKR</b> QQ-NH <sub>2</sub>         |
|                       |        |     |                              | y10    | 910.0  | 2   | I.I <b>SWIKRKR</b> QQ-NH <sub>2</sub>          |
|                       |        |     |                              | y9     | 853.6  | 2   | i. <b>SWIKRKR</b> QQ-NH <sub>2</sub>           |
|                       |        |     |                              | y8     | 809.5  | 2   | s. <b>WIKRKR</b> QQ-NH <sub>2</sub>            |
|                       |        |     |                              | y6     | 659.4  | 2   | i. <b>KRKR</b> QQ-NH <sub>2</sub>              |

<sup>†</sup> **Palmitoylation** sites within the amino acid sequence of the peptide are highlighted in **bold blue**.

**Table S7. Ions produced by fragmenting double-palmitoylated melittin at  $m/z$  832 ( $z = 4$ ) at RT = 9.4 min of the EIC (see Fig. 3 and Fig. S5), LTQFT. Data are presented graphically in Fig. S6c.**

| b-ions                 | $m/z$  | $z$ | Sequence Ladder <sup>†</sup>     | y-ions               | $m/z$  | $z$ | Sequence Ladder <sup>†</sup>                   |
|------------------------|--------|-----|----------------------------------|----------------------|--------|-----|------------------------------------------------|
| b3                     | 466.2  | 1   | H- <b>G</b> IG.a                 | y19                  | 1223.6 | 2   | k.VLTTGLPALISW <b>I</b> KRKRQQ-NH <sub>2</sub> |
| b4                     | 537.3  | 1   | H- <b>G</b> IGA.v                | y18                  | 1174.0 | 2   | v.LTTGLPALISW <b>I</b> KRKRQQ-NH <sub>2</sub>  |
| b5                     | 636.2  | 1   | H- <b>G</b> IGAV.I               | y17                  | 1117.5 | 2   | l.TTGLPALISW <b>I</b> KRKRQQ-NH <sub>2</sub>   |
| b6                     | 749.2  | 1   | H- <b>G</b> IGAVL.k              | y16                  | 1066.9 | 2   | t.TGLPALISW <b>I</b> KRKRQQ-NH <sub>2</sub>    |
| b7                     | 877.4  | 1   | H- <b>G</b> IGAVLK.v             | y15                  | 1016.1 | 2   | t.GLPALISW <b>I</b> KRKRQQ-NH <sub>2</sub>     |
| b8                     | 976.1  | 1   | H- <b>G</b> IGAVLKV.I            | y14                  | 987.8  | 2   | g.LPALISW <b>I</b> KRKRQQ-NH <sub>2</sub>      |
| b9                     | 1089.6 | 1   | H- <b>G</b> IGAVLKV.L.t          | y13                  | 931.1  | 2   | l.PALISW <b>I</b> KRKRQQ-NH <sub>2</sub>       |
| b10                    | 1190.9 | 1   | H- <b>G</b> IGAVLKVLT.t          | y12                  | 883.0  | 2   | p.ALISW <b>I</b> KRKRQQ-NH <sub>2</sub>        |
| b12                    | 1348.6 | 1   | H- <b>G</b> IGAVLKVLT.TG.I       | y11                  | 847.3  | 2   | a.LISW <b>I</b> KRKRQQ-NH <sub>2</sub>         |
| b12 - H <sub>2</sub> O | 1330.7 | 1   | H- <b>G</b> IGAVLKVLT.TG.I       | y10                  | 790.6  | 2   | l.ISW <b>I</b> KRKRQQ-NH <sub>2</sub>          |
| b12 - H <sub>2</sub> O | 666.0  | 2   | H- <b>G</b> IGAVLKVLT.TG.I       | y9                   | 734.1  | 2   | i.SW <b>I</b> KRKRQQ-NH <sub>2</sub>           |
| b13                    | 1461.5 | 1   | H- <b>G</b> IGAVLKVLT.TGL.p      | y6                   | 1080.1 | 1   | i. <b>K</b> RKRQQ-NH <sub>2</sub>              |
| b13 - H <sub>2</sub> O | 1443.7 | 1   | H- <b>G</b> IGAVLKVLT.TGL.p      | y4                   | 558.3  | 1   | r.KRQQ-NH <sub>2</sub>                         |
| b15                    | 816.1  | 2   | H- <b>G</b> IGAVLKVLT.TGLPA.I    | y4 - NH <sub>3</sub> | 541.8  | 1   | r.KRQQ-NH <sub>2</sub>                         |
| b18                    | 972.6  | 2   | H- <b>G</b> IGAVLKVLT.TGLPALIS.w |                      |        |     |                                                |

<sup>†</sup> **Palmitoylation** sites within the amino acid sequence of the peptide are highlighted in **bold blue**.

**Table S8.** Ions produced by fragmenting double-palmitoylated melittin at  $m/z$  832 ( $z = 4$ ) at RT = 10.1 min of the EIC (see Fig. 3 and Fig. S5), LTQFT. Data are presented graphically in Fig. S7b.

| b-ions                 | $m/z$  | $z$ | Sequence Ladder <sup>†</sup> | y-ions               | $m/z$  | $z$ | Sequence Ladder <sup>†</sup>          |
|------------------------|--------|-----|------------------------------|----------------------|--------|-----|---------------------------------------|
| b4                     | 299.1  | 1   | H-GIGA.v                     | y19                  | 1223.7 | 2   | k.VLTTGLPALISWIKRKRQQ-NH <sub>2</sub> |
| b5                     | 398.2  | 1   | H-GIGAV.I                    | y18                  | 1173.9 | 2   | v.LTTGLPALISWIKRKRQQ-NH <sub>2</sub>  |
| b6                     | 511.3  | 1   | H-GIGAVL.k                   | y17                  | 1117.4 | 2   | I.TTGLPALISWIKRKRQQ-NH <sub>2</sub>   |
| b7                     | 877.6  | 1   | H-GIGAVLK.v                  | y16                  | 1066.8 | 2   | t.TGLPALISWIKRKRQQ-NH <sub>2</sub>    |
| b8                     | 976.5  | 1   | H-GIGAVLKV.I                 | y15                  | 1016.5 | 2   | t.GLPALISWIKRKRQQ-NH <sub>2</sub>     |
| b9                     | 1089.7 | 1   | H-GIGAVLKVLT.t               | y14                  | 987.9  | 2   | g.LPALISWIKRKRQQ-NH <sub>2</sub>      |
| b10                    | 1190.6 | 1   | H-GIGAVLKVLT.t               | y13                  | 931.2  | 2   | I.PALISWIKRKRQQ-NH <sub>2</sub>       |
| b11                    | 1291.6 | 1   | H-GIGAVLKVLT.T.g             | y12                  | 882.7  | 2   | p.ALISWIKRKRQQ-NH <sub>2</sub>        |
| b12                    | 1348.7 | 1   | H-GIGAVLKVLT.TG.I            | y11                  | 847.2  | 2   | a.LISWIKRKRQQ-NH <sub>2</sub>         |
| b12 - H <sub>2</sub> O | 1330.7 | 1   | H-GIGAVLKVLT.T G.I           | y10                  | 790.8  | 2   | I.ISWIKRKRQQ-NH <sub>2</sub>          |
| b12 - H <sub>2</sub> O | 666.0  | 2   | H-GIGAVLKVLT.T G.I           | y9                   | 734.0  | 2   | i.SWIKRKRQQ-NH <sub>2</sub>           |
| b13                    | 1461.8 | 1   | H-GIGAVLKVLT.TGL.p           | y8                   | 734.0  | 2   | s.WIKRKRQQ-NH <sub>2</sub>            |
| b13 - H <sub>2</sub> O | 1443.7 | 1   | H-GIGAVLKVLT.TGL.p           | y7                   | 597.2  | 2   | w.IKRKRQQ-NH <sub>2</sub>             |
| b15                    | 816.2  | 2   | H-GIGAVLKVLT.TGLPA.I         | y6                   | 541.1  | 2   | i.KRKRQQ-NH <sub>2</sub>              |
| b18                    | 972.2  | 2   | H-GIGAVLKVLT.TGLPALIS.w      | y4 - NH <sub>3</sub> | 271.2  | 2   | r.KRQQ-NH <sub>2</sub>                |

<sup>†</sup> **Palmitoylation** sites within the amino acid sequence of the peptide are highlighted in **bold blue**.

**Table S9.** Ions produced by fragmenting double-palmitoylated melittin at  $m/z$  832 ( $z = 4$ ) at RT = 10.6 min of the EIC (see Fig. 3 and Fig. S5), LTQFT. Data are presented graphically in Fig. S7a.

| b-ions                 | $m/z$  | $z$ | Sequence Ladder <sup>†</sup> | y-ions | $m/z$  | $z$ | Sequence Ladder <sup>†</sup>          |
|------------------------|--------|-----|------------------------------|--------|--------|-----|---------------------------------------|
| b3                     | 466.2  | 1   | H-GIG.a                      | y19    | 1223.6 | 2   | k.VLTTGLPALISWIKRKRQQ-NH <sub>2</sub> |
| b4                     | 537.2  | 1   | H-GIGA.v                     | y18    | 1173.9 | 2   | v.LTTGLPALISWIKRKRQQ-NH <sub>2</sub>  |
| b5                     | 636.2  | 1   | H-GIGAV.I                    | y17    | 1117.5 | 2   | I.TTGLPALISWIKRKRQQ-NH <sub>2</sub>   |
| b6                     | 749.3  | 1   | H-GIGAVL.k                   | y16    | 1067.0 | 2   | t.TGLPALISWIKRKRQQ-NH <sub>2</sub>    |
| b7                     | 877.3  | 1   | H-GIGAVLK.v                  | y15    | 1016.5 | 2   | t.GLPALISWIKRKRQQ-NH <sub>2</sub>     |
| b8                     | 976.7  | 1   | H-GIGAVLKV.I                 | y14    | 987.9  | 2   | g.LPALISWIKRKRQQ-NH <sub>2</sub>      |
| b9                     | 1089.6 | 1   | H-GIGAVLKVLT.t               | y13    | 931.4  | 2   | I.PALISWIKRKRQQ-NH <sub>2</sub>       |
| b10                    | 1190.6 | 1   | H-GIGAVLKVLT.t               | y12    | 882.7  | 2   | p.ALISWIKRKRQQ-NH <sub>2</sub>        |
| b12                    | 1348.6 | 1   | H-GIGAVLKVLT.TG.I            | y11    | 847.4  | 2   | a.LISWIKRKRQQ-NH <sub>2</sub>         |
| b12 - H <sub>2</sub> O | 1330.6 | 1   | H-GIGAVLKVLT.TG.I            | y10    | 790.6  | 2   | I.ISWIKRKRQQ-NH <sub>2</sub>          |
| b12 - H <sub>2</sub> O | 666.0  | 2   | H-GIGAVLKVLT.TG.I            | y9     | 734.2  | 2   | i.SWIKRKRQQ-NH <sub>2</sub>           |
| b13                    | 1461.4 | 1   | H-GIGAVLKVLT.TGL.p           | y5     | 477.3  | 2   | k.RKRQQ-NH <sub>2</sub>               |
| b13 - H <sub>2</sub> O | 1443.7 | 1   | H-GIGAVLKVLT.TGL.p           | y4     | 398.2  | 2   | r.KRQQ-NH <sub>2</sub>                |
| b15                    | 816.1  | 2   | H-GIGAVLKVLT.TGLPA.I         |        |        |     |                                       |
| b18                    | 972.7  | 2   | H-GIGAVLKVLT.TGLPALIS.w      |        |        |     |                                       |

<sup>†</sup> **Palmitoylation** sites within the amino acid sequence of the peptide are highlighted in **bold blue**.



**Table S10.** Ions produced by fragmenting double-palmitoylated melittin at  $m/z$  832 ( $z = 4$ ) at RT = 10.9 min of the EIC (see Fig. 3 and Fig. S5), LTQFT. Data are presented graphically in Fig. S8a.

| b-ions                 | $m/z$  | $z$ | Sequence Ladder <sup>†</sup>     | y-ions | $m/z$  | $z$ | Sequence Ladder <sup>†</sup>                   |
|------------------------|--------|-----|----------------------------------|--------|--------|-----|------------------------------------------------|
| b3                     | 466.2  | 1   | H- <b>G</b> IG.a                 | y19    | 1223.7 | 2   | k.VLTTGLPALISWIK <b>R</b> KRQQ-NH <sub>2</sub> |
| b4                     | 537.2  | 1   | H- <b>G</b> IGA.v                | y18    | 1173.8 | 2   | v.LTTGLPALISWIK <b>R</b> KRQQ-NH <sub>2</sub>  |
| b5                     | 636.3  | 1   | H- <b>G</b> IGAV.I               | y17    | 1117.5 | 2   | I.TTGLPALISWIK <b>R</b> KRQQ-NH <sub>2</sub>   |
| b6                     | 749.4  | 1   | H- <b>G</b> IGAVL.k              | y16    | 1067.1 | 2   | t.TGLPALISWIK <b>R</b> KRQQ-NH <sub>2</sub>    |
| b7                     | 877.5  | 1   | H- <b>G</b> IGAVLK.v             | y15    | 1016.5 | 2   | t.GLPALISWIK <b>R</b> KRQQ-NH <sub>2</sub>     |
| b7                     | 439.7  | 2   | H- <b>G</b> IGAVLK.v             | y14    | 987.9  | 2   | g.LPALISWIK <b>R</b> KRQQ-NH <sub>2</sub>      |
| b8                     | 976.6  | 1   | H- <b>G</b> IGAVLKV.I            | y13    | 931.5  | 2   | I.PALISWIK <b>R</b> KRQQ-NH <sub>2</sub>       |
| b9                     | 1089.6 | 1   | H- <b>G</b> IGAVLKV.L.t          | y12    | 882.9  | 2   | p.ALISWIK <b>R</b> KRQQ-NH <sub>2</sub>        |
| b10                    | 1190.4 | 1   | H- <b>G</b> IGAVLKV.LT.t         | y11    | 847.4  | 2   | a.LISWIK <b>R</b> KRQQ-NH <sub>2</sub>         |
| b12                    | 1348.7 | 1   | H- <b>G</b> IGAVLKV.LTTG.I       | y10    | 790.8  | 2   | I.ISWIK <b>R</b> KRQQ-NH <sub>2</sub>          |
| b12 - H <sub>2</sub> O | 1330.7 | 1   | H- <b>G</b> IGAVLKV.LTTG.I       | y9     | 734.0  | 2   | i.SWIK <b>R</b> KRQQ-NH <sub>2</sub>           |
| b12 - H <sub>2</sub> O | 665.9  | 2   | H- <b>G</b> IGAVLKV.LTTG.I       | y5     | 477.1  | 2   | k. <b>R</b> KRQQ-NH <sub>2</sub>               |
| b13                    | 1461.8 | 1   | H- <b>G</b> IGAVLKV.LTTGL.p      |        |        |     |                                                |
| b13 - H <sub>2</sub> O | 1443.8 | 1   | H- <b>G</b> IGAVLKV.LTTGL.p      |        |        |     |                                                |
| b15                    | 815.9  | 2   | H- <b>G</b> IGAVLKV.LTTGLPA.I    |        |        |     |                                                |
| b18                    | 972.4  | 2   | H- <b>G</b> IGAVLKV.LTTGLPALIS.w |        |        |     |                                                |

<sup>†</sup> **Palmitoylation** sites within the amino acid sequence of the peptide are highlighted in **bold blue**.

**Table S11.** Ions produced by fragmenting double-palmitoylated melittin at  $m/z$  832 ( $z = 4$ ) at RT = 11.2 min of the EIC (see Fig. 3 and Fig. S5), LTQFT. Data are presented graphically in Fig. S8b.

| b-ions                 | $m/z$  | $z$ | Sequence Ladder <sup>†</sup>     | y-ions               | $m/z$  | $z$ | Sequence Ladder <sup>†</sup>                   |
|------------------------|--------|-----|----------------------------------|----------------------|--------|-----|------------------------------------------------|
| b3                     | 466.2  | 1   | H- <b>G</b> IG.a                 | y19                  | 1223.4 | 2   | k.VLTTGLPALISWIK <b>R</b> KRQQ-NH <sub>2</sub> |
| b4                     | 537.1  | 1   | H- <b>G</b> IGA.v                | y18                  | 1173.8 | 2   | v.LTTGLPALISWIK <b>R</b> KRQQ-NH <sub>2</sub>  |
| b5                     | 636.3  | 1   | H- <b>G</b> IGAV.I               | y17                  | 1117.4 | 2   | I.TTGLPALISWIK <b>R</b> KRQQ-NH <sub>2</sub>   |
| b6                     | 749.4  | 1   | H- <b>G</b> IGAVL.k              | y16                  | 1067.4 | 2   | t.TGLPALISWIK <b>R</b> KRQQ-NH <sub>2</sub>    |
| b7                     | 877.6  | 1   | H- <b>G</b> IGAVLK.v             | y15                  | 1016.5 | 2   | t.GLPALISWIK <b>R</b> KRQQ-NH <sub>2</sub>     |
| b7                     | 439.4  | 2   | H- <b>G</b> IGAVLK.v             | y14                  | 987.9  | 2   | g.LPALISWIK <b>R</b> KRQQ-NH <sub>2</sub>      |
| b8                     | 976.6  | 1   | H- <b>G</b> IGAVLKV.I            | y13                  | 931.5  | 2   | I.PALISWIK <b>R</b> KRQQ-NH <sub>2</sub>       |
| b9                     | 1089.7 | 1   | H- <b>G</b> IGAVLKV.L.t          | y12                  | 882.7  | 2   | p.ALISWIK <b>R</b> KRQQ-NH <sub>2</sub>        |
| b10                    | 1190.7 | 1   | H- <b>G</b> IGAVLKV.LT.t         | y11                  | 847.5  | 2   | a.LISWIK <b>R</b> KRQQ-NH <sub>2</sub>         |
| b12                    | 1348.7 | 1   | H- <b>G</b> IGAVLKV.LTTG.I       | y10                  | 790.3  | 2   | I.ISWIK <b>R</b> KRQQ-NH <sub>2</sub>          |
| b12 - H <sub>2</sub> O | 1330.8 | 1   | H- <b>G</b> IGAVLKV.LTTG.I       | y9                   | 733.3  | 2   | i.SWIK <b>R</b> KRQQ-NH <sub>2</sub>           |
| b12 - H <sub>2</sub> O | 665.9  | 2   | H- <b>G</b> IGAVLKV.LTTG.I       | y8 - NH <sub>3</sub> | 681.4  | 2   | s.WIK <b>R</b> KRQQ-NH <sub>2</sub>            |
| b13                    | 1461.8 | 1   | H- <b>G</b> IGAVLKV.LTTGL.p      | y5                   | 477.1  | 2   | k. <b>R</b> KRQQ-NH <sub>2</sub>               |
| b13 - H <sub>2</sub> O | 1443.8 | 1   | H- <b>G</b> IGAVLKV.LTTGL.p      | y5 - NH <sub>3</sub> | 468.5  | 2   | k. <b>R</b> KRQQ-NH <sub>2</sub>               |
| b15                    | 816.3  | 2   | H- <b>G</b> IGAVLKV.LTTGLPA.I    | y4 - NH <sub>3</sub> | 390.5  | 2   | r. <b>R</b> KRQQ-NH <sub>2</sub>               |
| b18                    | 972.3  | 2   | H- <b>G</b> IGAVLKV.LTTGLPALIS.w |                      |        |     |                                                |

<sup>†</sup> **Palmitoylation** sites within the amino acid sequence of the peptide are highlighted in **bold blue**.

**Table S12.** Ions produced by fragmenting double-oleoylated melittin at  $m/z$  845 ( $z = 4$ ) at RT = 9.2 min of the EIC (see Fig. 2, Fig. 3 and Fig. S9), LTQFT. Data are presented graphically in Fig. S10a.

| b-ions | $m/z$  | $z$ | Sequence Ladder <sup>‡</sup> | y-ions                 | $m/z$  | $z$ | Sequence Ladder <sup>‡</sup>          |
|--------|--------|-----|------------------------------|------------------------|--------|-----|---------------------------------------|
| b4     | 299.1  | 1   | H-GIGA.v                     | y19                    | 1368.6 | 2   | k.VLTTGLPALISWIKRKRQQ-NH <sub>2</sub> |
| b5     | 398.2  | 1   | H-GIGAV.I                    | y18                    | 1318.6 | 2   | v.LTTGLPALISWIKRKRQQ-NH <sub>2</sub>  |
| b6     | 511.3  | 1   | H-GIGAVL.k                   | y17                    | 1262.6 | 2   | I.TTGLPALISWIKRKRQQ-NH <sub>2</sub>   |
| b12    | 1348.7 | 1   | H-GIGAVLKVLTTG.I             | y16                    | 1211.8 | 2   | t.TGLPALISWIKRKRQQ-NH <sub>2</sub>    |
| b13    | 1461.8 | 1   | H-GIGAVLKVLTTGL.p            | y15                    | 1161.6 | 2   | t.GLPALISWIKRKRQQ-NH <sub>2</sub>     |
|        |        |     |                              | y14                    | 1132.0 | 2   | g.LPALISWIKRKRQQ-NH <sub>2</sub>      |
|        |        |     |                              | y13                    | 1076.1 | 2   | I.PALISWIKRKRQQ-NH <sub>2</sub>       |
|        |        |     |                              | y13 - H <sub>2</sub> O | 1066.9 | 2   | I.PALISWIKRKRQQ-NH <sub>2</sub>       |
|        |        |     |                              | y12                    | 1027.4 | 2   | p.ALISWIKRKRQQ-NH <sub>2</sub>        |
|        |        |     |                              | y11                    | 992.4  | 2   | a.LISWIKRKRQQ-NH <sub>2</sub>         |
|        |        |     |                              | y10                    | 935.6  | 2   | I.ISWIKRKRQQ-NH <sub>2</sub>          |
|        |        |     |                              | y7                     | 610.3  | 2   | w.IKRKRQQ-NH <sub>2</sub>             |
|        |        |     |                              | y6                     | 554.2  | 2   | i.KRKRQQ-NH <sub>2</sub>              |
| y5     | 714.4  | 1   | k.RKRQQ-NH <sub>2</sub>      |                        |        |     |                                       |

<sup>‡</sup> Oleoylation sites within the amino acid sequence of the peptide are highlighted in bold red.

**Table S13.** Ions produced by fragmenting double-oleoylated melittin at  $m/z$  845 ( $z = 4$ ) at RT = 9.6 min of the EIC (see Fig. 2, Fig. 3 and Fig. S9), LTQFT. Data are presented graphically in Fig. S10b.

| b-ions | $m/z$  | $z$ | Sequence Ladder <sup>‡</sup> | y-ions               | $m/z$  | $z$ | Sequence Ladder <sup>‡</sup>          |
|--------|--------|-----|------------------------------|----------------------|--------|-----|---------------------------------------|
| b4     | 299.1  | 1   | H-GIGA.v                     | y19                  | 1368.7 | 2   | k.VLTTGLPALISWIKRKRQQ-NH <sub>2</sub> |
| b5     | 398.2  | 1   | H-GIGAV.I                    | y18                  | 1318.9 | 2   | v.LTTGLPALISWIKRKRQQ-NH <sub>2</sub>  |
| b6     | 511.3  | 1   | H-GIGAVL.k                   | y17                  | 1262.7 | 2   | I.TTGLPALISWIKRKRQQ-NH <sub>2</sub>   |
| b10    | 952.5  | 1   | H-GIGAVLKVLt.t               | y16                  | 1211.9 | 2   | t.TGLPALISWIKRKRQQ-NH <sub>2</sub>    |
| b12    | 1110.6 | 1   | H-GIGAVLKVLTTG.I             | y15                  | 1161.5 | 2   | t.GLPALISWIKRKRQQ-NH <sub>2</sub>     |
| b13    | 1223.6 | 1   | H-GIGAVLKVLTTGL.p            | y14                  | 1132.8 | 2   | g.LPALISWIKRKRQQ-NH <sub>2</sub>      |
|        |        |     |                              | y13                  | 1076.6 | 2   | I.PALISWIKRKRQQ-NH <sub>2</sub>       |
|        |        |     |                              | y13-H <sub>2</sub> O | 1067.6 | 2   | I.PALISWIKRKRQQ-NH <sub>2</sub>       |
|        |        |     |                              | y12                  | 1027.5 | 2   | p.ALISWIKRKRQQ-NH <sub>2</sub>        |
|        |        |     |                              | y11                  | 992.8  | 2   | a.LISWIKRKRQQ-NH <sub>2</sub>         |
|        |        |     |                              | y10                  | 935.9  | 2   | I.ISWIKRKRQQ-NH <sub>2</sub>          |
|        |        |     |                              | y8                   | 835.8  | 2   | s.WIKRKRQQ-NH <sub>2</sub>            |
|        |        |     |                              | y7                   | 742.2  | 2   | w.IKRKRQQ-NH <sub>2</sub>             |
| y5     | 490.3  | 2   | k.RKRQQ-NH <sub>2</sub>      |                      |        |     |                                       |

<sup>‡</sup> Oleoylation sites within the amino acid sequence of the peptide are highlighted in bold red.

**Table S14.** Ions produced by fragmenting double-oleoylated melittin at  $m/z$  845 ( $z = 4$ ) at RT = 9.6 min of the EIC (see Fig. 2, Fig. 3 and Fig. S9), LTQFT. Data are presented graphically in Fig. S10c.

| b-ions | $m/z$  | $z$ | Sequence Ladder <sup>‡</sup> | y-ions | $m/z$  | $z$ | Sequence Ladder <sup>‡</sup>            |
|--------|--------|-----|------------------------------|--------|--------|-----|-----------------------------------------|
| b3     | 492.3  | 1   | H-GIG.a                      | y21    | 1356.6 | 2   | v.LKVLTTGLPALISWIKRKRQQ-NH <sub>2</sub> |
| b4     | 563.2  | 1   | H-GIGA.v                     | y19    | 1236.4 | 2   | k.VLTTGLPALISWIKRKRQQ-NH <sub>2</sub>   |
| b5     | 662.3  | 1   | H-GIGAV.I                    | y18    | 1187.0 | 2   | v.LTTGLPALISWIKRKRQQ-NH <sub>2</sub>    |
| b6     | 775.3  | 1   | H-GIGAVL.k                   | y17    | 1130.5 | 2   | I.TTGLPALISWIKRKRQQ-NH <sub>2</sub>     |
| b7     | 903.4  | 1   | H-GIGAVL.k.v                 | y16    | 1079.8 | 2   | t.TGLPALISWIKRKRQQ-NH <sub>2</sub>      |
| b8     | 1002.6 | 1   | H-GIGAVLKV.I                 | y15    | 1029.4 | 2   | t.GLPALISWIKRKRQQ-NH <sub>2</sub>       |
| b9     | 1115.6 | 1   | H-GIGAVLKV.L.t               | y14    | 1001.0 | 2   | g.LPALISWIKRKRQQ-NH <sub>2</sub>        |
| b10    | 1216.7 | 1   | H-GIGAVLKVLT.t               | y13    | 944.4  | 2   | I.PALISWIKRKRQQ-NH <sub>2</sub>         |
| b12    | 1374.7 | 1   | H-GIGAVLKVLT.TG.I            | y12    | 895.2  | 2   | p.ALISWIKRKRQQ-NH <sub>2</sub>          |
| b13    | 1487.8 | 1   | H-GIGAVLKVLT.TGL.p           | y11    | 860.4  | 2   | a.LISWIKRKRQQ-NH <sub>2</sub>           |
|        |        |     |                              | y10    | 803.3  | 2   | I.ISWIKRKRQQ-NH <sub>2</sub>            |
|        |        |     |                              | y9     | 746.9  | 2   | i.SWIKRKRQQ-NH <sub>2</sub>             |
|        |        |     |                              | y8     | 703.7  | 2   | s.WIKRKRQQ-NH <sub>2</sub>              |
|        |        |     |                              | y7     | 609.2  | 2   | w.IKRKRQQ-NH <sub>2</sub>               |
|        |        |     |                              | y5     | 714.5  | 1   | k.RKRQQ-NH <sub>2</sub>                 |
|        |        |     |                              | y4     | 558.5  | 1   | r.KRQQ-NH <sub>2</sub>                  |

<sup>‡</sup> Oleoylation sites within the amino acid sequence of the peptide are highlighted in **bold red**.

**Table S15.** Ions produced by fragmenting double-oleoylated melittin at  $m/z$  845 ( $z = 4$ ) at RT = 10.2 min of the EIC (see Fig. 2, Fig. 3 and Fig. S9), LTQFT. Data are presented graphically in Fig. S11a.

| b-ions                 | $m/z$  | $z$ | Sequence Ladder <sup>‡</sup> | y-ions                 | $m/z$  | $z$ | Sequence Ladder <sup>‡</sup>           |
|------------------------|--------|-----|------------------------------|------------------------|--------|-----|----------------------------------------|
| b4                     | 299.1  | 1   | H-GIGA.v                     | y20                    | 1432.5 | 2   | I.KVLTTGLPALISWIKRKRQQ-NH <sub>2</sub> |
| b5                     | 398.2  | 1   | H-GIGAV.I                    | y19                    | 1236.7 | 2   | k.VLTTGLPALISWIKRKRQQ-NH <sub>2</sub>  |
| b6                     | 511.3  | 1   | H-GIGAVL.k                   | y18                    | 1187.0 | 2   | v.LTTGLPALISWIKRKRQQ-NH <sub>2</sub>   |
| b7                     | 903.5  | 1   | H-GIGAVL.k.v                 | y17                    | 1130.5 | 2   | I.TTGLPALISWIKRKRQQ-NH <sub>2</sub>    |
| b8                     | 1002.6 | 1   | H-GIGAVLKV.I                 | y16                    | 1079.6 | 2   | t.TGLPALISWIKRKRQQ-NH <sub>2</sub>     |
| b9                     | 1115.7 | 1   | H-GIGAVLKV.L.t               | y16 – H <sub>2</sub> O | 1069.1 | 2   | t.TGLPALISWIKRKRQQ-NH <sub>2</sub>     |
| b10                    | 1216.6 | 1   | H-GIGAVLKVLT.t               | y15                    | 1029.2 | 2   | t.GLPALISWIKRKRQQ-NH <sub>2</sub>      |
| b11                    | 1317.8 | 1   | H-GIGAVLKVLT.T.g             | y14                    | 1000.7 | 2   | g.LPALISWIKRKRQQ-NH <sub>2</sub>       |
| b12                    | 1374.7 | 1   | H-GIGAVLKVLT.TG.I            | y13                    | 944.4  | 2   | I.PALISWIKRKRQQ-NH <sub>2</sub>        |
| b13                    | 1487.8 | 1   | H-GIGAVLKVLT.TGL.p           | y12                    | 895.8  | 2   | p.ALISWIKRKRQQ-NH <sub>2</sub>         |
| b13 + H <sub>2</sub> O | 754.3  | 2   | H-GIGAVLKVLT.TGL.p           | y11                    | 860.4  | 2   | a.LISWIKRKRQQ-NH <sub>2</sub>          |
| b18 + H <sub>2</sub> O | 993.9  | 2   | H-GIGAVLKVLT.TGLPALIS.w      | y10                    | 804.2  | 2   | I.ISWIKRKRQQ-NH <sub>2</sub>           |
|                        |        |     |                              | y9                     | 747.6  | 2   | i.SWIKRKRQQ-NH <sub>2</sub>            |
|                        |        |     |                              | y8                     | 703.8  | 2   | s.WIKRKRQQ-NH <sub>2</sub>             |
|                        |        |     |                              | y7                     | 609.2  | 2   | w.IKRKRQQ-NH <sub>2</sub>              |
|                        |        |     |                              | y6                     | 553.5  | 2   | i.KRKRQQ-NH <sub>2</sub>               |
|                        |        |     |                              | y4 - NH <sub>3</sub>   | 271.2  | 2   | r.KRQQ-NH <sub>2</sub>                 |

<sup>‡</sup> Oleoylation sites within the amino acid sequence of the peptide are highlighted in **bold red**.

**Table S16.** Ions produced by fragmenting double-oleoylated melittin at  $m/z$  845 ( $z = 4$ ) at RT = 10.6 min of the EIC (see Fig. 2, Fig. 3 and Fig. S9), LTQFT. Data are presented graphically in Fig. S11b.

| b-ions               | $m/z$  | $z$ | Sequence Ladder <sup>‡</sup>    | y-ions | $m/z$  | $z$ | Sequence Ladder <sup>‡</sup>                     |
|----------------------|--------|-----|---------------------------------|--------|--------|-----|--------------------------------------------------|
| b3                   | 492.3  | 1   | H- <b>G</b> IG.a                | y21    | 1356.7 | 2   | v.LKVLTTGLPALISWIK <b>R</b> KRQQ-NH <sub>2</sub> |
| b4                   | 563.3  | 1   | H- <b>G</b> IGA.v               | y19    | 1236.4 | 2   | k.VLTTGLPALISWIK <b>R</b> KRQQ-NH <sub>2</sub>   |
| b5                   | 662.3  | 1   | H- <b>G</b> IGAV.I              | y18    | 1187.0 | 2   | v.LTTGLPALISWIK <b>R</b> KRQQ-NH <sub>2</sub>    |
| b6                   | 775.3  | 1   | H- <b>G</b> IGAVL.k             | y17    | 1130.2 | 2   | I.TTGLPALISWIK <b>R</b> KRQQ-NH <sub>2</sub>     |
| b7                   | 903.6  | 1   | H- <b>G</b> IGAVLK.v            | y16    | 1079.7 | 2   | t.TGLPALISWIK <b>R</b> KRQQ-NH <sub>2</sub>      |
| b8                   | 1002.5 | 1   | H- <b>G</b> IGAVLKV.I           | y15    | 1029.4 | 2   | t.GLPALISWIK <b>R</b> KRQQ-NH <sub>2</sub>       |
| b9                   | 1115.6 | 1   | H- <b>G</b> IGAVLKVL.t          | y14    | 1000.9 | 2   | g.LPALISWIK <b>R</b> KRQQ-NH <sub>2</sub>        |
| b10                  | 1216.7 | 1   | H- <b>G</b> IGAVLKVLT.t         | y13    | 944.5  | 2   | I.PALISWIK <b>R</b> KRQQ-NH <sub>2</sub>         |
| b12                  | 1374.7 | 1   | H- <b>G</b> IGAVLKVLTTG.I       | y12    | 895.8  | 2   | p.ALISWIK <b>R</b> KRQQ-NH <sub>2</sub>          |
| b13                  | 1488.0 | 1   | H- <b>G</b> IGAVLKVLTTGL.p      | y11    | 860.4  | 2   | a.LISWIK <b>R</b> KRQQ-NH <sub>2</sub>           |
|                      |        |     |                                 | y10    | 803.7  | 2   | I.ISWIK <b>R</b> KRQQ-NH <sub>2</sub>            |
|                      |        |     |                                 | y9     | 747.1  | 2   | i.SWIK <b>R</b> KRQQ-NH <sub>2</sub>             |
|                      |        |     |                                 | y8     | 703.8  | 2   | s.WIK <b>R</b> KRQQ-NH <sub>2</sub>              |
|                      |        |     |                                 | y7     | 609.1  | 2   | w.IK <b>R</b> KRQQ-NH <sub>2</sub>               |
|                      |        |     |                                 | y5     | 490.0  | 2   | k. <b>R</b> KRQQ-NH <sub>2</sub>                 |
|                      |        |     |                                 | y4     | 822.9  | 1   | r. <b>K</b> RQQ-NH <sub>2</sub>                  |
| y4 - NH <sub>3</sub> | 806.1  | 1   | r. <b>K</b> RQQ-NH <sub>2</sub> |        |        |     |                                                  |

<sup>‡</sup> **Oleoylation** sites within the amino acid sequence of the peptide are highlighted in **bold red**.

**Table S17.** Ions produced by fragmenting double-oleoylated melittin at  $m/z$  845 ( $z = 4$ ) at RT = 10.9 min of the EIC (see Fig. 2, Fig. 3 and Fig. S9), LTQFT. Data are presented graphically in Fig. S12a.

| b-ions | $m/z$  | $z$ | Sequence Ladder <sup>‡</sup> | y-ions | $m/z$  | $z$ | Sequence Ladder <sup>‡</sup>                     |
|--------|--------|-----|------------------------------|--------|--------|-----|--------------------------------------------------|
| b3     | 492.3  | 1   | H- <b>G</b> IG.a             | y21    | 1356.7 | 2   | v.LKVLTTGLPALISWIK <b>R</b> KRQQ-NH <sub>2</sub> |
| b4     | 563.2  | 1   | H- <b>G</b> IGA.v            | y19    | 1236.5 | 2   | k.VLTTGLPALISWIK <b>R</b> KRQQ-NH <sub>2</sub>   |
| b5     | 662.3  | 1   | H- <b>G</b> IGAV.I           | y18    | 1187.5 | 2   | v.LTTGLPALISWIK <b>R</b> KRQQ-NH <sub>2</sub>    |
| b6     | 775.2  | 1   | H- <b>G</b> IGAVL.k          | y17    | 1130.6 | 2   | I.TTGLPALISWIK <b>R</b> KRQQ-NH <sub>2</sub>     |
| b7     | 903.4  | 1   | H- <b>G</b> IGAVLK.v         | y16    | 1080.2 | 2   | t.TGLPALISWIK <b>R</b> KRQQ-NH <sub>2</sub>      |
| b8     | 1002.7 | 1   | H- <b>G</b> IGAVLKV.I        | y15    | 1029.6 | 2   | t.GLPALISWIK <b>R</b> KRQQ-NH <sub>2</sub>       |
| b9     | 1115.6 | 1   | H- <b>G</b> IGAVLKVL.t       | y14    | 1001.0 | 2   | g.LPALISWIK <b>R</b> KRQQ-NH <sub>2</sub>        |
| b10    | 1216.7 | 1   | H- <b>G</b> IGAVLKVLT.t      | y13    | 944.4  | 2   | I.PALISWIK <b>R</b> KRQQ-NH <sub>2</sub>         |
| b12    | 1374.7 | 1   | H- <b>G</b> IGAVLKVLTTG.I    | y12    | 895.6  | 2   | p.ALISWIK <b>R</b> KRQQ-NH <sub>2</sub>          |
| b13    | 1487.9 | 1   | H- <b>G</b> IGAVLKVLTTGL.p   | y11    | 860.0  | 2   | a.LISWIK <b>R</b> KRQQ-NH <sub>2</sub>           |
|        |        |     |                              | y10    | 803.8  | 2   | I.ISWIK <b>R</b> KRQQ-NH <sub>2</sub>            |
|        |        |     |                              | y9     | 747.5  | 2   | i.SWIK <b>R</b> KRQQ-NH <sub>2</sub>             |
|        |        |     |                              | y8     | 703.7  | 2   | s.WIK <b>R</b> KRQQ-NH <sub>2</sub>              |
|        |        |     |                              | y7     | 609.1  | 2   | w.IK <b>R</b> KRQQ-NH <sub>2</sub>               |
|        |        |     |                              | y5     | 490.1  | 2   | k. <b>R</b> KRQQ-NH <sub>2</sub>                 |
|        |        |     |                              | y4     | 558.5  | 1   | r. <b>K</b> RQQ-NH <sub>2</sub>                  |

<sup>‡</sup> **Oleoylation** sites within the amino acid sequence of the peptide are highlighted in **bold red**.

**Table S18. Ions produced by fragmenting double-oleoylated melittin at  $m/z$  845 ( $z = 4$ ) at RT = 11.2 min of the EIC (see Fig. 2, Fig. 3 and Fig. S9), LTQFT. Data are presented graphically in Fig. S12b.**

| b-ions | $m/z$  | $z$ | Sequence Ladder <sup>‡</sup> | y-ions | $m/z$  | $z$ | Sequence Ladder <sup>‡</sup>                      |
|--------|--------|-----|------------------------------|--------|--------|-----|---------------------------------------------------|
| b3     | 492.3  | 1   | H-GIG.a                      | y21    | 1356.9 | 2   | v.LKVLTTGLPALISWIKRKR <b>R</b> QQ-NH <sub>2</sub> |
| b4     | 563.1  | 1   | H-GIGA.v                     | y19    | 1236.1 | 2   | k.VLTTGLPALISWIKRKR <b>R</b> QQ-NH <sub>2</sub>   |
| b5     | 662.3  | 1   | H-GIGAV.I                    | y18    | 1187.0 | 2   | v.LTTGLPALISWIKRKR <b>R</b> QQ-NH <sub>2</sub>    |
| b6     | 775.4  | 1   | H-GIGAVL.k                   | y17    | 1130.4 | 2   | I.TTGLPALISWIKRKR <b>R</b> QQ-NH <sub>2</sub>     |
| b7     | 903.5  | 1   | H-GIGAVLK.v                  | y16    | 1079.7 | 2   | t.TGLPALISWIKRKR <b>R</b> QQ-NH <sub>2</sub>      |
| b8     | 1002.6 | 1   | H-GIGAVLK.V.I                | y15    | 1029.1 | 2   | t.GLPALISWIKRKR <b>R</b> QQ-NH <sub>2</sub>       |
| b9     | 1115.7 | 1   | H-GIGAVLKVL.t                | y14    | 1001.1 | 2   | g.LPALISWIKRKR <b>R</b> QQ-NH <sub>2</sub>        |
| b10    | 1216.8 | 1   | H-GIGAVLKVL.T.t              | y13    | 944.4  | 2   | I.PALISWIKRKR <b>R</b> QQ-NH <sub>2</sub>         |
| b12    | 1374.7 | 1   | H-GIGAVLKVLTTG.I             | y12    | 895.7  | 2   | p.ALISWIKRKR <b>R</b> QQ-NH <sub>2</sub>          |
| b13    | 1487.9 | 1   | H-GIGAVLKVLTTGL.p            | y11    | 860.5  | 2   | a.LISWIKRKR <b>R</b> QQ-NH <sub>2</sub>           |
|        |        |     |                              | y10    | 803.8  | 2   | I.ISWIKRKR <b>R</b> QQ-NH <sub>2</sub>            |
|        |        |     |                              | y9     | 747.3  | 2   | i.SWIKRKR <b>R</b> QQ-NH <sub>2</sub>             |
|        |        |     |                              | y8     | 703.7  | 2   | s.WIKRKR <b>R</b> QQ-NH <sub>2</sub>              |
|        |        |     |                              | y7     | 609.1  | 2   | w.IKRKR <b>R</b> QQ-NH <sub>2</sub>               |
|        |        |     |                              | y5     | 490.4  | 2   | k.RKR <b>R</b> QQ-NH <sub>2</sub>                 |
|        |        |     |                              | y4     | 822.8  | 1   | r.KR <b>R</b> QQ-NH <sub>2</sub>                  |

<sup>‡</sup> Oleoylation sites within the amino acid sequence of the peptide are highlighted in **bold red**.

**Table S19. Ions produced by fragmenting melittin modified by 1 oleoyl group + 1 palmitoyl group at  $m/z$  838 ( $z = 4$ ) at RT = 9.1 min of the EIC (see Fig. 3 and Fig. S13), LTQFT. Data are presented graphically in Fig. S14a.**

| b-ions                 | $m/z$  | $z$ | Sequence Ladder <sup>¶</sup> | y-ions | $m/z$  | $z$ | Sequence Ladder <sup>¶</sup>                     |
|------------------------|--------|-----|------------------------------|--------|--------|-----|--------------------------------------------------|
| b4                     | 299.2  | 1   | H-GIGA.v                     | y20    | 1419.9 | 2   | I.KVLTTGLPALISWIKRKR <b>R</b> QQ-NH <sub>2</sub> |
| b5                     | 398.2  | 1   | H-GIGAV.I                    | y19    | 1355.7 | 2   | k.VLTTGLPALISWIKRKR <b>R</b> QQ-NH <sub>2</sub>  |
| b6                     | 511.3  | 1   | H-GIGAVL.k                   | y18    | 1306.5 | 2   | v.LTTGLPALISWIKRKR <b>R</b> QQ-NH <sub>2</sub>   |
| b8                     | 738.8  | 1   | H-GIGAVLK.V.I                | y17    | 1249.5 | 2   | I.TTGLPALISWIKRKR <b>R</b> QQ-NH <sub>2</sub>    |
| b9                     | 851.6  | 1   | H-GIGAVLKVL.t                | y16    | 1199.0 | 2   | t.TGLPALISWIKRKR <b>R</b> QQ-NH <sub>2</sub>     |
| b12                    | 1110.8 | 1   | H-GIGAVLKVLTTG.I             | y15    | 1148.7 | 2   | t.GLPALISWIKRKR <b>R</b> QQ-NH <sub>2</sub>      |
| b13                    | 1223.7 | 1   | H-GIGAVLKVLTTGL.p            | y14    | 1119.2 | 2   | g.LPALISWIKRKR <b>R</b> QQ-NH <sub>2</sub>       |
| b13 + H <sub>2</sub> O | 621.4  | 2   | H-GIGAVLKVLTTGL.p            | y13    | 1063.5 | 2   | I.PALISWIKRKR <b>R</b> QQ-NH <sub>2</sub>        |
| b15 - NH <sub>3</sub>  | 1374.6 | 1   | H-GIGAVLKVLTTGLPA.I          | y10    | 922.8  | 2   | I.ISWIKRKR <b>R</b> QQ-NH <sub>2</sub>           |
| b16                    | 753.7  | 2   | H-GIGAVLKVLTTGLPAL.i         | y9     | 866.3  | 2   | i.SWIKRKR <b>R</b> QQ-NH <sub>2</sub>            |
| b17                    | 809.8  | 2   | H-GIGAVLKVLTTGLPALI.s        | y6     | 1080.6 | 1   | i.KRKR <b>R</b> QQ-NH <sub>2</sub>               |
| b18                    | 985.0  | 2   | H-GIGAVLKVLTTGLPALIS.w       |        |        |     |                                                  |

<sup>¶</sup> Oleoylation and palmitoylation sites within the amino acid sequence of the peptide are highlighted in **bold red** and **bold blue** respectively.

**Table S20.** Ions produced by fragmenting melittin modified by 1 oleoyl group + 1 palmitoyl group at  $m/z$  838 ( $z = 4$ ) at RT = 9.1 min of the EIC (see Fig. 3 and Fig. S13), LTQFT. Data are presented graphically in Fig. S14b.

| b-ions                 | $m/z$  | $z$ | Sequence Ladder <sup>†</sup> | y-ions | $m/z$  | $z$ | Sequence Ladder <sup>†</sup>          |
|------------------------|--------|-----|------------------------------|--------|--------|-----|---------------------------------------|
| b4                     | 299.2  | 1   | H-GIGA.v                     | y20    | 1419.9 | 2   | I.KVLTGLPALISWIKRKRQQ-NH <sub>2</sub> |
| b5                     | 398.2  | 1   | H-GIGAV.I                    | y19    | 1355.7 | 2   | k.VLTGLPALISWIKRKRQQ-NH <sub>2</sub>  |
| b6                     | 511.3  | 1   | H-GIGAVL.k                   | y18    | 1306.5 | 2   | v.LTTGLPALISWIKRKRQQ-NH <sub>2</sub>  |
| b8                     | 738.8  | 1   | H-GIGAVLKV.I                 | y17    | 1249.5 | 2   | I.TTGLPALISWIKRKRQQ-NH <sub>2</sub>   |
| b9                     | 851.6  | 1   | H-GIGAVLKVL.t                | y16    | 1199.0 | 2   | t.TGLPALISWIKRKRQQ-NH <sub>2</sub>    |
| b12                    | 1110.8 | 1   | H-GIGAVLKVLTTG.I             | y15    | 1148.7 | 2   | t.GLPALISWIKRKRQQ-NH <sub>2</sub>     |
| b13                    | 1223.7 | 1   | H-GIGAVLKVLTTGL.p            | y14    | 1119.2 | 2   | g.LPALISWIKRKRQQ-NH <sub>2</sub>      |
| b13 + H <sub>2</sub> O | 621.4  | 2   | H-GIGAVLKVLTTGL.p            | y13    | 1063.5 | 2   | I.PALISWIKRKRQQ-NH <sub>2</sub>       |
| b15 – NH <sub>3</sub>  | 1374.6 | 1   | H-GIGAVLKVLTTGLPA.I          | y10    | 922.8  | 2   | I.ISWIKRKRQQ-NH <sub>2</sub>          |
| b16                    | 753.7  | 2   | H-GIGAVLKVLTTGLPAL.i         | y9     | 866.3  | 2   | i.SWIKRKRQQ-NH <sub>2</sub>           |
| b17                    | 809.8  | 2   | H-GIGAVLKVLTTGLPALI.s        |        |        |     |                                       |
| b18                    | 971.9  | 2   | H-GIGAVLKVLTTGLPALIS.w       |        |        |     |                                       |

<sup>†</sup> **Oleoylation** and **palmitoylation** sites within the amino acid sequence of the peptide are highlighted in **bold red** and **bold blue** respectively.

**Table S21.** Ions produced by fragmenting melittin modified by 1 oleoyl group + 1 palmitoyl group at  $m/z$  838 ( $z = 4$ ) at RT = 9.5 min of the EIC (see Fig. 3 and Fig. S13), LTQFT. Data are presented graphically in Fig. S15a.

| b-ions                 | $m/z$  | $z$ | Sequence Ladder <sup>†</sup> | y-ions | $m/z$  | $z$ | Sequence Ladder <sup>†</sup>          |
|------------------------|--------|-----|------------------------------|--------|--------|-----|---------------------------------------|
| b4                     | 299.1  | 1   | H-GIGA.v                     | y20    | 1419.9 | 2   | I.KVLTGLPALISWIKRKRQQ-NH <sub>2</sub> |
| b5                     | 398.2  | 1   | H-GIGAV.I                    | y19    | 1355.8 | 2   | k.VLTGLPALISWIKRKRQQ-NH <sub>2</sub>  |
| b6                     | 511.4  | 1   | H-GIGAVL.k                   | y18    | 1306.5 | 2   | v.LTTGLPALISWIKRKRQQ-NH <sub>2</sub>  |
| b8                     | 738.6  | 1   | H-GIGAVLKV.I                 | y17    | 1249.4 | 2   | I.TTGLPALISWIKRKRQQ-NH <sub>2</sub>   |
| b9                     | 851.5  | 1   | H-GIGAVLKVL.t                | y16    | 1199.1 | 2   | t.TGLPALISWIKRKRQQ-NH <sub>2</sub>    |
| b12                    | 1110.8 | 1   | H-GIGAVLKVLTTG.I             | y15    | 1148.4 | 2   | t.GLPALISWIKRKRQQ-NH <sub>2</sub>     |
| b13                    | 1223.6 | 1   | H-GIGAVLKVLTTGL.p            | y14    | 1119.2 | 2   | g.LPALISWIKRKRQQ-NH <sub>2</sub>      |
| b13 + H <sub>2</sub> O | 621.5  | 2   | H-GIGAVLKVLTTGL.p            | y13    | 1063.5 | 2   | I.PALISWIKRKRQQ-NH <sub>2</sub>       |
| b15 – NH <sub>3</sub>  | 1374.6 | 1   | H-GIGAVLKVLTTGLPA.I          | y10    | 923.3  | 2   | I.ISWIKRKRQQ-NH <sub>2</sub>          |
| b19                    | 947.1  | 2   | H-GIGAVLKVLTTGLPALISW.i      | y9     | 866.1  | 2   | i.SWIKRKRQQ-NH <sub>2</sub>           |
| b20                    | 1002.7 | 2   | H-GIGAVLKVLTTGLPALISWI.k     | y8     | 822.5  | 2   | s.WIKRKRQQ-NH <sub>2</sub>            |
|                        |        |     |                              | y7     | 729.4  | 2   | w.IKRKRQQ-NH <sub>2</sub>             |
|                        |        |     |                              | y5     | 476.7  | 2   | k.RKRQQ-NH <sub>2</sub>               |
|                        |        |     |                              | y4     | 795.9  | 1   | r.KRQQ-NH <sub>2</sub>                |

<sup>†</sup> **Oleoylation** and **palmitoylation** sites within the amino acid sequence of the peptide are highlighted in **bold red** and **bold blue** respectively.

**Table S22.** Ions produced by fragmenting melittin modified by 1 oleoyl group + 1 palmitoyl group at  $m/z$  838 ( $z = 4$ ) at RT = 9.5 min of the EIC (see Fig. 3 and Fig. S13), LTQFT. Data are presented graphically in Fig. S15b.

| b-ions                 | $m/z$  | $z$ | Sequence Ladder <sup>†</sup> | y-ions | $m/z$  | $z$ | Sequence Ladder <sup>†</sup>                             |
|------------------------|--------|-----|------------------------------|--------|--------|-----|----------------------------------------------------------|
| b4                     | 299.2  | 1   | H-GIGA.v                     | y20    | 1419.9 | 2   | I.KVLTGLPALISWIK <b>K</b> RK <b>R</b> QQ-NH <sub>2</sub> |
| b5                     | 398.2  | 1   | H-GIGAV.I                    | y19    | 1355.8 | 2   | k.VLTTGLPALISWIK <b>K</b> RK <b>R</b> QQ-NH <sub>2</sub> |
| b6                     | 511.4  | 1   | H-GIGAVL.k                   | y18    | 1306.5 | 2   | v.LTTGLPALISWIK <b>K</b> RK <b>R</b> QQ-NH <sub>2</sub>  |
| b8                     | 738.6  | 1   | H-GIGAVLK.V.I                | y17    | 1249.4 | 2   | I.TTGLPALISWIK <b>K</b> RK <b>R</b> QQ-NH <sub>2</sub>   |
| b9                     | 851.5  | 1   | H-GIGAVLK.VL.t               | y16    | 1199.0 | 2   | t.TGLPALISWIK <b>K</b> RK <b>R</b> QQ-NH <sub>2</sub>    |
| b12                    | 1110.8 | 1   | H-GIGAVLK.VLTTG.I            | y15    | 1148.4 | 2   | t.GLPALISWIK <b>K</b> RK <b>R</b> QQ-NH <sub>2</sub>     |
| b13                    | 1223.6 | 1   | H-GIGAVLK.VLTTGL.p           | y14    | 1119.2 | 2   | g.LPALISWIK <b>K</b> RK <b>R</b> QQ-NH <sub>2</sub>      |
| b13 + H <sub>2</sub> O | 621.5  | 2   | H-GIGAVLK.VLTTGL.p           | y13    | 1063.5 | 2   | I.PALISWIK <b>K</b> RK <b>R</b> QQ-NH <sub>2</sub>       |
| b15 - NH <sub>3</sub>  | 1374.6 | 1   | H-GIGAVLK.VLTTGL.PA.I        | y10    | 923.3  | 2   | I.ISWIK <b>K</b> RK <b>R</b> QQ-NH <sub>2</sub>          |
| b19                    | 946.3  | 2   | H-GIGAVLK.VLTTGLPALISW.i     | y9     | 866.1  | 2   | i.SWIK <b>K</b> RK <b>R</b> QQ-NH <sub>2</sub>           |
| b20                    | 1002.7 | 2   | H-GIGAVLK.VLTTGLPALISW.i.k   | y8     | 822.5  | 2   | s.WIK <b>K</b> RK <b>R</b> QQ-NH <sub>2</sub>            |
|                        |        |     |                              | y7     | 729.4  | 2   | w.I <b>K</b> RK <b>R</b> QQ-NH <sub>2</sub>              |
|                        |        |     |                              | y5     | 489.3  | 2   | k.R <b>K</b> RQQ-NH <sub>2</sub>                         |
|                        |        |     |                              | y4     | 411.8  | 1   | r.R <b>K</b> RQQ-NH <sub>2</sub>                         |

<sup>†</sup> **Oleoylation** and **palmitoylation** sites within the amino acid sequence of the peptide are highlighted in **bold red** and **bold blue** respectively.

**Table S23.** Ions produced by fragmenting melittin modified by 1 oleoyl group + 1 palmitoyl group at  $m/z$  838 ( $z = 4$ ) at RT = 9.5 min of the EIC (see Fig. 3 and Fig. S13), LTQFT.

| b-ions                 | $m/z$  | $z$ | Sequence Ladder <sup>†</sup> | y-ions               | $m/z$  | $z$ | Sequence Ladder <sup>†</sup>                             |
|------------------------|--------|-----|------------------------------|----------------------|--------|-----|----------------------------------------------------------|
| b3                     | 492.3  | 1   | H- <b>G</b> IG.a             | y19                  | 1223.6 | 2   | k.VLTTGLPALISWIK <b>K</b> RK <b>R</b> QQ-NH <sub>2</sub> |
| b4                     | 563.3  | 1   | H- <b>G</b> IGA.v            | y18                  | 1174.2 | 2   | v.LTTGLPALISWIK <b>K</b> RK <b>R</b> QQ-NH <sub>2</sub>  |
| b5                     | 662.3  | 1   | H- <b>G</b> IGAV.I           | y17                  | 1117.7 | 2   | I.TTGLPALISWIK <b>K</b> RK <b>R</b> QQ-NH <sub>2</sub>   |
| b5 + H <sub>2</sub> O  | 679.1  | 1   | H- <b>G</b> IGAV.I           | y16                  | 1066.6 | 2   | t.TGLPALISWIK <b>K</b> RK <b>R</b> QQ-NH <sub>2</sub>    |
| b6                     | 775.3  | 1   | H- <b>G</b> IGAVL.k          | y15                  | 1016.5 | 2   | t.GLPALISWIK <b>K</b> RK <b>R</b> QQ-NH <sub>2</sub>     |
| b8                     | 1002.7 | 1   | H- <b>G</b> IGAVLK.V.I       | y14                  | 987.9  | 2   | g.LPALISWIK <b>K</b> RK <b>R</b> QQ-NH <sub>2</sub>      |
| b9                     | 1115.6 | 1   | H- <b>G</b> IGAVLK.VL.t      | y13                  | 931.2  | 2   | I.PALISWIK <b>K</b> RK <b>R</b> QQ-NH <sub>2</sub>       |
| b10                    | 1216.8 | 1   | H- <b>G</b> IGAVLK.VL.T.t    | y12                  | 882.9  | 2   | p.ALISWIK <b>K</b> RK <b>R</b> QQ-NH <sub>2</sub>        |
| b12                    | 1374.7 | 1   | H- <b>G</b> IGAVLK.VLTTG.I   | y11                  | 847.2  | 2   | a.LISWIK <b>K</b> RK <b>R</b> QQ-NH <sub>2</sub>         |
| b13                    | 1487.8 | 1   | H- <b>G</b> IGAVLK.VLTTGL.p  | y10                  | 790.6  | 2   | I.ISWIK <b>K</b> RK <b>R</b> QQ-NH <sub>2</sub>          |
| b13 - H <sub>2</sub> O | 1469.7 | 1   | H- <b>G</b> IGAVLK.VLTTGL.p  | y9                   | 733.7  | 2   | i.SWIK <b>K</b> RK <b>R</b> QQ-NH <sub>2</sub>           |
|                        |        |     |                              | y7                   | 597.1  | 2   | w.I <b>K</b> RK <b>R</b> QQ-NH <sub>2</sub>              |
|                        |        |     |                              | y6                   | 1080.1 | 1   | i. <b>K</b> RK <b>R</b> QQ-NH <sub>2</sub>               |
|                        |        |     |                              | y4                   | 558.4  | 1   | r.R <b>K</b> RQQ-NH <sub>2</sub>                         |
|                        |        |     |                              | y4 - NH <sub>3</sub> | 541.9  | 1   | r.R <b>K</b> RQQ-NH <sub>2</sub>                         |

<sup>†</sup> **Oleoylation** and **palmitoylation** sites within the amino acid sequence of the peptide are highlighted in **bold red** and **bold blue** respectively.

**Table S24. Ions produced by fragmenting melittin modified by 1 oleoyl group + 1 palmitoyl group at  $m/z$  838 ( $z = 4$ ) at RT = 9.5 min of the EIC (see Fig. 3 and Fig. S13), LTQFT.**

| b-ions                 | $m/z$  | $z$ | Sequence Ladder <sup>†</sup>    | y-ions               | $m/z$  | $z$ | Sequence Ladder <sup>†</sup>                     |
|------------------------|--------|-----|---------------------------------|----------------------|--------|-----|--------------------------------------------------|
| b3                     | 466.3  | 1   | H- <b>G</b> IG.a                | y21                  | 1356.8 | 2   | v.LKVLTTGLPALISWIK <b>R</b> KRQQ-NH <sub>2</sub> |
| b4                     | 537.1  | 1   | H- <b>G</b> IGA.v               | y20                  | 1299.9 | 2   | I.KVLTTGLPALISWIK <b>R</b> KRQQ-NH <sub>2</sub>  |
| b5                     | 636.5  | 1   | H- <b>G</b> IGAV.I              | y19                  | 1236.7 | 2   | k.VLTTGLPALISWIK <b>R</b> KRQQ-NH <sub>2</sub>   |
| b6                     | 749.2  | 1   | H- <b>G</b> IGAVL.k             | y18                  | 1187.5 | 2   | v.LTTGLPALISWIK <b>R</b> KRQQ-NH <sub>2</sub>    |
| b8                     | 976.6  | 1   | H- <b>G</b> IGAVLKV.I           | y17                  | 1130.5 | 2   | I.TTGLPALISWIK <b>R</b> KRQQ-NH <sub>2</sub>     |
| b9                     | 1089.6 | 1   | H- <b>G</b> IGAVLKVL.t          | y16                  | 1080.1 | 2   | t.TGLPALISWIK <b>R</b> KRQQ-NH <sub>2</sub>      |
| b10                    | 1190.8 | 1   | H- <b>G</b> IGAVLKVLT.t         | y15                  | 1029.1 | 2   | t.GLPALISWIK <b>R</b> KRQQ-NH <sub>2</sub>       |
| b12                    | 1348.8 | 1   | H- <b>G</b> IGAVLKVLTTG.I       | y14                  | 1000.9 | 2   | g.LPALISWIK <b>R</b> KRQQ-NH <sub>2</sub>        |
| b12 - H <sub>2</sub> O | 1330.8 | 1   | H- <b>G</b> IGAVLKVLTTG.I       | y13                  | 944.4  | 2   | I.PALISWIK <b>R</b> KRQQ-NH <sub>2</sub>         |
| b12 - H <sub>2</sub> O | 666.2  | 2   | H- <b>G</b> IGAVLKVLTTG.I       | y12                  | 896.7  | 2   | p.ALISWIK <b>R</b> KRQQ-NH <sub>2</sub>          |
| b13                    | 1461.7 | 1   | H- <b>G</b> IGAVLKVLTTGL.p      | y10                  | 803.2  | 2   | I.ISWIK <b>R</b> KRQQ-NH <sub>2</sub>            |
| b13 - H <sub>2</sub> O | 1443.8 | 1   | H- <b>G</b> IGAVLKVLTTGL.p      | y9                   | 747.2  | 2   | i.SWIK <b>R</b> KRQQ-NH <sub>2</sub>             |
| b18                    | 972.3  | 2   | H- <b>G</b> IGAVLKVLTTGLPALIS.w | y8                   | 703.8  | 2   | s.WIK <b>R</b> KRQQ-NH <sub>2</sub>              |
|                        |        |     |                                 | y7                   | 609.1  | 1   | w.I <b>R</b> KRQQ-NH <sub>2</sub>                |
|                        |        |     |                                 | y4                   | 558.4  | 1   | r.KRQQ-NH <sub>2</sub>                           |
|                        |        |     |                                 | y4 - NH <sub>3</sub> | 541.9  | 1   | r.KRQQ-NH <sub>2</sub>                           |

<sup>†</sup> **Oleoylation** and **palmitoylation** sites within the amino acid sequence of the peptide are highlighted in **bold red** and **bold blue** respectively.



**Table S25. Ions produced by fragmenting melittin modified by 1 oleoyl group + 1 palmitoyl group at  $m/z$  838 ( $z = 4$ ) at RT = 10.2 min of the EIC (see Fig. 3 and Fig. S13), LTQFT. Data are presented graphically in Fig. S16a.**

| b-ions                 | $m/z$  | $z$ | Sequence Ladder <sup>†</sup>    | y-ions               | $m/z$  | $z$ | Sequence Ladder <sup>†</sup>            |
|------------------------|--------|-----|---------------------------------|----------------------|--------|-----|-----------------------------------------|
| b4                     | 299.1  | 1   | H-GIGA.v                        | y21                  | 1476.2 | 2   | v.LKVLTTGLPALISWIKRKRQQ-NH <sub>2</sub> |
| b5                     | 398.2  | 1   | H-GIGAV.I                       | y20                  | 1419.9 | 2   | I.KVLTTGLPALISWIKRKRQQ-NH <sub>2</sub>  |
| b6                     | 511.3  | 1   | H-GIGAVL.k                      | y19                  | 1223.6 | 2   | k.VLTTGLPALISWIKRKRQQ-NH <sub>2</sub>   |
| b7                     | 903.6  | 1   | H-GIGAVL <b>K</b> .v            | y18                  | 1174.0 | 2   | v.LTTGLPALISWIKRKRQQ-NH <sub>2</sub>    |
| b8                     | 1002.6 | 1   | H-GIGAVL <b>KV</b> .I           | y17                  | 1117.4 | 2   | I.TTGLPALISWIKRKRQQ-NH <sub>2</sub>     |
| b9                     | 1115.7 | 1   | H-GIGAVL <b>KVL</b> .t          | y16                  | 1067.3 | 2   | t.TGLPALISWIKRKRQQ-NH <sub>2</sub>      |
| b10                    | 1216.7 | 1   | H-GIGAVL <b>KVLT</b> .t         | y15                  | 1016.4 | 2   | t.GLPALISWIKRKRQQ-NH <sub>2</sub>       |
| b10 - H <sub>2</sub> O | 1198.9 | 1   | H-GIGAVL <b>KVLT</b> .t         | y14                  | 987.6  | 2   | g.LPALISWIKRKRQQ-NH <sub>2</sub>        |
| b11                    | 1317.7 | 1   | H-GIGAVL <b>KVLTT</b> .g        | y13                  | 931.1  | 2   | I.PALISWIKRKRQQ-NH <sub>2</sub>         |
| b12                    | 1374.7 | 1   | H-GIGAVL <b>KVLTTG</b> .I       | y9                   | 733.5  | 2   | i.SWIKRKRQQ-NH <sub>2</sub>             |
| b12 - H <sub>2</sub> O | 1356.6 | 1   | H-GIGAVL <b>KVLTTG</b> .I       | y7                   | 597.5  | 2   | w. <b>IKRKRQQ</b> -NH <sub>2</sub>      |
| b12 - H <sub>2</sub> O | 678.1  | 2   | H-GIGAVL <b>KVLTTG</b> .I       | y6                   | 1080.5 | 1   | i. <b>KRKRQQ</b> -NH <sub>2</sub>       |
| b13                    | 1488.0 | 1   | H-GIGAVL <b>KVLTTGL</b> .p      | y6                   | 540.9  | 2   | i. <b>KRKRQQ</b> -NH <sub>2</sub>       |
| b13 - H <sub>2</sub> O | 1470.1 | 1   | H-GIGAVL <b>KVLTTGL</b> .p      | y6 - NH <sub>3</sub> | 1063.5 | 1   | i. <b>KRKRQQ</b> -NH <sub>2</sub>       |
| b14 - H <sub>2</sub> O | 783.2  | 2   | H-GIGAVL <b>KVLTTGLP</b> .a     | y4                   | 558.3  | 1   | r.KRQQ-NH <sub>2</sub>                  |
| b18                    | 985.1  | 2   | H-GIGAVL <b>KVLTTGLPALIS</b> .w |                      |        |     |                                         |

<sup>†</sup> **Oleoylation** and **palmitoylation** sites within the amino acid sequence of the peptide are highlighted in **bold red** and **bold blue** respectively.

**Table S26. Ions produced by fragmenting melittin modified by 1 oleoyl group + 1 palmitoyl group at  $m/z$  838 ( $z = 4$ ) at RT = 10.2 min of the EIC (see Fig. 3 and Fig. S13), LTQFT. Data are presented graphically in Fig. S16b.**

| b-ions                 | $m/z$  | $z$ | Sequence Ladder <sup>†</sup> | y-ions | $m/z$  | $z$ | Sequence Ladder <sup>†</sup>            |
|------------------------|--------|-----|------------------------------|--------|--------|-----|-----------------------------------------|
| b4                     | 299.1  | 1   | H-GIGA.v                     | y21    | 1476.2 | 2   | v.LKVLTTGLPALISWIKRKRQQ-NH <sub>2</sub> |
| b5                     | 398.2  | 1   | H-GIGAV.I                    | y20    | 1419.9 | 2   | I.KVLTTGLPALISWIKRKRQQ-NH <sub>2</sub>  |
| b6                     | 511.3  | 1   | H-GIGAVL.k                   | y19    | 1236.6 | 2   | k.VLTTGLPALISWIKRKRQQ-NH <sub>2</sub>   |
| b7                     | 877.5  | 1   | H-GIGAVLK.v                  | y18    | 1187.2 | 2   | v.LTTGLPALISWIKRKRQQ-NH <sub>2</sub>    |
| b8                     | 976.6  | 1   | H-GIGAVLKV.I                 | y17    | 1130.3 | 2   | I.TTGLPALISWIKRKRQQ-NH <sub>2</sub>     |
| b9                     | 1089.6 | 1   | H-GIGAVLKVLT.t               | y16    | 1080.0 | 2   | t.TGLPALISWIKRKRQQ-NH <sub>2</sub>      |
| b10                    | 1190.7 | 1   | H-GIGAVLKVLT.t               | y15    | 1030.1 | 2   | t.GLPALISWIKRKRQQ-NH <sub>2</sub>       |
| b11                    | 1291.7 | 1   | H-GIGAVLKVLT.g               | y14    | 1000.7 | 2   | g.LPALISWIKRKRQQ-NH <sub>2</sub>        |
| b11 - H <sub>2</sub> O | 1273.7 | 1   | H-GIGAVLKVLT.g               | y13    | 944.3  | 2   | I.PALISWIKRKRQQ-NH <sub>2</sub>         |
| b12                    | 1348.6 | 1   | H-GIGAVLKVLTG.I              | y12    | 896.4  | 2   | p.ALISWIKRKRQQ-NH <sub>2</sub>          |
| b12 - H <sub>2</sub> O | 1330.8 | 1   | H-GIGAVLKVLT G.I             | y11    | 860.0  | 2   | a.LISWIKRKRQQ-NH <sub>2</sub>           |
| b12 - H <sub>2</sub> O | 665.9  | 2   | H-GIGAVLKVLT G.I             | y10    | 803.2  | 2   | I.ISWIKRKRQQ-NH <sub>2</sub>            |
| b13                    | 1461.8 | 1   | H-GIGAVLKVLTG.L.p            | y9     | 745.9  | 2   | i.SWIKRKRQQ-NH <sub>2</sub>             |
| b15                    | 816.1  | 2   | H-GIGAVLKVLTG.LPA.I          | y8     | 703.5  | 2   | s.WIKRKRQQ-NH <sub>2</sub>              |
| b18                    | 972.4  | 2   | H-GIGAVLKVLTG.LPALIS.w       | y7     | 610.5  | 2   | w.IKRKRQQ-NH <sub>2</sub>               |
|                        |        |     |                              | y4     | 558.3  | 2   | r.KRQQ-NH <sub>2</sub>                  |

<sup>†</sup> **Oleoylation** and **palmitoylation** sites within the amino acid sequence of the peptide are highlighted in **bold red** and **bold blue** respectively.

**Table S27. Ions produced by fragmenting melittin modified by 1 oleoyl group + 1 palmitoyl group at  $m/z$  838 ( $z = 4$ ) at RT = 10.6 min of the EIC (see Fig. 3 and Fig. S13), LTQFT. Data are presented graphically in Fig. S17a.**

| b-ions                 | $m/z$  | $z$ | Sequence Ladder <sup>†</sup>    | y-ions | $m/z$  | $z$ | Sequence Ladder <sup>†</sup>                   |
|------------------------|--------|-----|---------------------------------|--------|--------|-----|------------------------------------------------|
| b3                     | 492.3  | 1   | H- <b>G</b> IG.a                | y19    | 1223.6 | 2   | k.VLTTGLPALISWIKR <b>K</b> RQQ-NH <sub>2</sub> |
| b4                     | 563.3  | 1   | H- <b>G</b> IGA.v               | y18    | 1173.9 | 2   | v.LTTGLPALISWIKR <b>K</b> RQQ-NH <sub>2</sub>  |
| b5                     | 662.3  | 1   | H- <b>G</b> IGAV.l              | y17    | 1117.8 | 2   | l.TTGLPALISWIKR <b>K</b> RQQ-NH <sub>2</sub>   |
| b5 + H <sub>2</sub> O  | 679.2  | 1   | H- <b>G</b> IGAV.l              | y16    | 1067.0 | 2   | t.TGLPALISWIKR <b>K</b> RQQ-NH <sub>2</sub>    |
| b6                     | 775.3  | 1   | H- <b>G</b> IGAVL.k             | y15    | 1016.3 | 2   | t.GLPALISWIKR <b>K</b> RQQ-NH <sub>2</sub>     |
| b8                     | 1002.6 | 1   | H- <b>G</b> IGAVLKV.l           | y14    | 988.0  | 2   | g.LPALISWIKR <b>K</b> RQQ-NH <sub>2</sub>      |
| b9                     | 1115.6 | 1   | H- <b>G</b> IGAVLKVL.t          | y13    | 931.4  | 2   | l.PALISWIKR <b>K</b> RQQ-NH <sub>2</sub>       |
| b10                    | 1216.8 | 1   | H- <b>G</b> IGAVLKVLTTG.l       | y12    | 882.9  | 2   | p.ALISWIKR <b>K</b> RQQ-NH <sub>2</sub>        |
| b12                    | 1374.7 | 1   | H- <b>G</b> IGAVLKVLTTG.l       | y11    | 847.3  | 2   | a.LISWIKR <b>K</b> RQQ-NH <sub>2</sub>         |
| b13                    | 1487.7 | 1   | H- <b>G</b> IGAVLKVLTTGL.p      | y10    | 790.5  | 2   | l.ISWIKR <b>K</b> RQQ-NH <sub>2</sub>          |
| b13 - H <sub>2</sub> O | 1470.1 | 1   | H- <b>G</b> IGAVLKVLTTGL.p      | y9     | 734.0  | 2   | i.SWIKR <b>K</b> RQQ-NH <sub>2</sub>           |
|                        |        |     |                                 | y8     | 690.8  | 2   | s.WIKR <b>K</b> RQQ-NH <sub>2</sub>            |
|                        |        |     |                                 | y7     | 598.6  | 2   | w.IKR <b>K</b> RQQ-NH <sub>2</sub>             |
|                        |        |     |                                 | y6     | 1080.3 | 1   | i.KR <b>K</b> RQQ-NH <sub>2</sub>              |
|                        |        |     |                                 | y5     | 952.9  | 1   | k.R <b>K</b> RQQ-NH <sub>2</sub>               |
|                        |        |     |                                 | y5     | 476.9  | 2   | k.R <b>K</b> RQQ-NH <sub>2</sub>               |
|                        |        |     |                                 | y4     | 796.4  | 1   | r. <b>K</b> RQQ-NH <sub>2</sub>                |
| y4 - NH <sub>3</sub>   | 779.7  | 1   | r. <b>K</b> RQQ-NH <sub>2</sub> |        |        |     |                                                |

<sup>†</sup> **Oleoylation** and **palmitoylation** sites within the amino acid sequence of the peptide are highlighted in **bold red** and **bold blue** respectively.

**Table S28. Ions produced by fragmenting melittin modified by 1 oleoyl group + 1 palmitoyl group at  $m/z$  838 ( $z = 4$ ) at RT = 10.6 min of the EIC (see Fig. 3 and Fig. S13), LTQFT. Data are presented graphically in Fig. S17b.**

| b-ions                 | $m/z$  | $z$ | Sequence Ladder <sup>¶</sup>    | y-ions | $m/z$  | $z$ | Sequence Ladder <sup>¶</sup>                      |
|------------------------|--------|-----|---------------------------------|--------|--------|-----|---------------------------------------------------|
| b3                     | 466.3  | 1   | H- <b>G</b> IG.a                | y21    | 1356.7 | 2   | v.LKVLTTGLPALISWIK <b>K</b> RKRQQ-NH <sub>2</sub> |
| b4                     | 537.2  | 1   | H- <b>G</b> IGA.v               | y20    | 1299.9 | 2   | I.KVLTTGLPALISWIK <b>K</b> RQQ-NH <sub>2</sub>    |
| b5                     | 636.2  | 1   | H- <b>G</b> IGAV.I              | y19    | 1236.5 | 2   | k.VLTTGLPALISWIK <b>K</b> RQQ-NH <sub>2</sub>     |
| b6                     | 749.1  | 1   | H- <b>G</b> IGAVL.k             | y18    | 1186.8 | 2   | v.LTTGLPALISWIK <b>K</b> RQQ-NH <sub>2</sub>      |
| b7                     | 877.4  | 1   | H- <b>G</b> IGAVLK.v            | y17    | 1130.6 | 2   | I.TTGLPALISWIK <b>K</b> RQQ-NH <sub>2</sub>       |
| b8                     | 976.6  | 1   | H- <b>G</b> IGAVLKV.I           | y16    | 1080.1 | 2   | t.TGLPALISWIK <b>K</b> RQQ-NH <sub>2</sub>        |
| b9                     | 1089.7 | 1   | H- <b>G</b> IGAVLKVLT.t         | y15    | 1029.5 | 2   | t.GLPALISWIK <b>K</b> RQQ-NH <sub>2</sub>         |
| b10                    | 1190.2 | 1   | H- <b>G</b> IGAVLKVLT.t         | y14    | 1001.0 | 2   | g.LPALISWIK <b>K</b> RQQ-NH <sub>2</sub>          |
| b12                    | 1348.6 | 1   | H- <b>G</b> IGAVLKVLTG.I        | y13    | 944.4  | 2   | I.PALISWIK <b>K</b> RQQ-NH <sub>2</sub>           |
| b12 - H <sub>2</sub> O | 1330.8 | 1   | H- <b>G</b> IGAVLKVLTG.I        | y12    | 896.6  | 2   | p.ALISWIK <b>K</b> RQQ-NH <sub>2</sub>            |
| b12 - H <sub>2</sub> O | 666.1  | 2   | H- <b>G</b> IGAVLKVLTG.I        | y11    | 860.4  | 2   | a.LISWIK <b>K</b> RQQ-NH <sub>2</sub>             |
| b13                    | 1461.7 | 1   | H- <b>G</b> IGAVLKVLTG.L.p      | y10    | 803.7  | 2   | I.ISWIK <b>K</b> RQQ-NH <sub>2</sub>              |
| b13 - H <sub>2</sub> O | 1443.7 | 1   | H- <b>G</b> IGAVLKVLTG.L.p      | y9     | 746.7  | 2   | i.SWIK <b>K</b> RQQ-NH <sub>2</sub>               |
| b18                    | 972.3  | 2   | H- <b>G</b> IGAVLKVLTG.LPALIS.w | y7     | 703.8  | 2   | w.IK <b>K</b> RQQ-NH <sub>2</sub>                 |
|                        |        |     |                                 | y5     | 609.1  | 2   | k. <b>K</b> RQQ-NH <sub>2</sub>                   |
|                        |        |     |                                 | y4     | 822.6  | 1   | r. <b>K</b> RQQ-NH <sub>2</sub>                   |
|                        |        |     |                                 | y4     | 411.4  | 2   | r. <b>K</b> RQQ-NH <sub>2</sub>                   |

<sup>¶</sup> **Oleoylation** and **palmitoylation** sites within the amino acid sequence of the peptide are highlighted in **bold red** and **bold blue** respectively.

**Table S29.** Ions produced by fragmenting melittin modified by 1 oleoyl group + 1 palmitoyl group at  $m/z$  838 ( $z = 4$ ) at RT = 10.9 min of the EIC (see Fig. 3 and Fig. S13), LTQFT. Data are presented graphically in Fig. S18a.

| b-Ions                 | $m/z$  | $z$ | Sequence Ladder <sup>†</sup> | y-Ions               | $m/z$  | $z$ | Sequence Ladder <sup>†</sup>                   |
|------------------------|--------|-----|------------------------------|----------------------|--------|-----|------------------------------------------------|
| b3                     | 492.3  | 1   | H- <b>G</b> IG.a             | y19                  | 1223.6 | 2   | k.VLTTGLPALISWIK <b>R</b> KRQQ-NH <sub>2</sub> |
| b4                     | 563.2  | 1   | H- <b>G</b> IGA.v            | y18                  | 1173.8 | 2   | v.LTTGLPALISWIK <b>R</b> KRQQ-NH <sub>2</sub>  |
| b5                     | 662.3  | 1   | H- <b>G</b> IGAV.I           | y17                  | 1117.9 | 2   | I.TTGLPALISWIK <b>R</b> KRQQ-NH <sub>2</sub>   |
| b5 + H <sub>2</sub> O  | 679.0  | 1   | H- <b>G</b> IGAV.I           | y16                  | 1067.1 | 2   | t.TGLPALISWIK <b>R</b> KRQQ-NH <sub>2</sub>    |
| b6                     | 775.3  | 1   | H- <b>G</b> IGAVL.k          | y15                  | 1016.5 | 2   | t.GLPALISWIK <b>R</b> KRQQ-NH <sub>2</sub>     |
| b8                     | 1002.5 | 1   | H- <b>G</b> IGAVLK.V.I       | y14                  | 988.1  | 2   | g.LPALISWIK <b>R</b> KRQQ-NH <sub>2</sub>      |
| b9                     | 1115.7 | 1   | H- <b>G</b> IGAVLK.VL.t      | y13                  | 931.4  | 2   | I.PALISWIK <b>R</b> KRQQ-NH <sub>2</sub>       |
| b10                    | 1216.7 | 1   | H- <b>G</b> IGAVLK.VLT.t     | y12                  | 882.8  | 2   | p.ALISWIK <b>R</b> KRQQ-NH <sub>2</sub>        |
| b12                    | 1374.7 | 1   | H- <b>G</b> IGAVLK.VLTTG.I   | y11                  | 847.3  | 2   | a.LISWIK <b>R</b> KRQQ-NH <sub>2</sub>         |
| b13                    | 1487.7 | 1   | H- <b>G</b> IGAVLK.VLTTGL.p  | y10                  | 790.4  | 2   | I.ISWIK <b>R</b> KRQQ-NH <sub>2</sub>          |
| b13 – H <sub>2</sub> O | 1470.2 | 1   | H- <b>G</b> IGAVLK.VLTTGL.p  | y9                   | 734.1  | 2   | i.SWIK <b>R</b> KRQQ-NH <sub>2</sub>           |
|                        |        |     |                              | y8                   | 690.7  | 2   | s.WIK <b>R</b> KRQQ-NH <sub>2</sub>            |
|                        |        |     |                              | y7                   | 598.6  | 2   | w.IK <b>R</b> KRQQ-NH <sub>2</sub>             |
|                        |        |     |                              | y6                   | 1080.1 | 1   | i. <b>K</b> RK <b>R</b> QQ-NH <sub>2</sub>     |
|                        |        |     |                              | y5                   | 953.2  | 1   | k. <b>R</b> K <b>R</b> QQ-NH <sub>2</sub>      |
|                        |        |     |                              | y4                   | 558.6  | 1   | r.KRQQ-NH <sub>2</sub>                         |
|                        |        |     |                              | y4 - NH <sub>3</sub> | 541.3  | 1   | r.KRQQ-NH <sub>2</sub>                         |

<sup>†</sup> **Oleoylation** and **palmitoylation** sites within the amino acid sequence of the peptide are highlighted in **bold red** and **bold blue** respectively.

**Table S30. Ions produced by fragmenting melittin modified by 1 oleoyl group + 1 palmitoyl group at  $m/z$  838 ( $z = 4$ ) at RT = 10.9 min of the EIC (see Fig. 3 and Fig. S13), LTQFT. Data are presented graphically in Fig. S18b.**

| b-ions                 | $m/z$  | $z$ | Sequence Ladder <sup>†</sup>    | y-ions | $m/z$  | $z$ | Sequence Ladder <sup>†</sup>                     |
|------------------------|--------|-----|---------------------------------|--------|--------|-----|--------------------------------------------------|
| b3                     | 466.3  | 1   | H- <b>G</b> IG.a                | y21    | 1356.7 | 2   | v.LKVLTTGLPALISWIK <b>R</b> KRQQ-NH <sub>2</sub> |
| b4                     | 537.2  | 1   | H- <b>G</b> IGA.v               | y18    | 1186.9 | 2   | v.LTTGLPALISWIK <b>R</b> KRQQ-NH <sub>2</sub>    |
| b5                     | 636.2  | 1   | H- <b>G</b> IGAV.I              | y17    | 1130.5 | 2   | I.TTGLPALISWIK <b>R</b> KRQQ-NH <sub>2</sub>     |
| b6                     | 749.3  | 1   | H- <b>G</b> IGAVL.k             | y16    | 1080.1 | 2   | t.TGLPALISWIK <b>R</b> KRQQ-NH <sub>2</sub>      |
| b7                     | 877.4  | 1   | H- <b>G</b> IGAVLK.v            | y15    | 1029.5 | 2   | t.GLPALISWIK <b>R</b> KRQQ-NH <sub>2</sub>       |
| b8                     | 976.6  | 1   | H- <b>G</b> IGAVLKV.I           | y14    | 1000.8 | 2   | g.LPALISWIK <b>R</b> KRQQ-NH <sub>2</sub>        |
| b9                     | 1089.6 | 1   | H- <b>G</b> IGAVLKVL.t          | y13    | 944.4  | 2   | I.PALISWIK <b>R</b> KRQQ-NH <sub>2</sub>         |
| b12 - H <sub>2</sub> O | 1330.8 | 1   | H- <b>G</b> IGAVLKVLTTG.I       | y12    | 896.4  | 2   | p.ALISWIK <b>R</b> KRQQ-NH <sub>2</sub>          |
| b12 - H <sub>2</sub> O | 666.0  | 2   | H- <b>G</b> IGAVLKVLTTG.I       | y11    | 860.4  | 2   | a.LISWIK <b>R</b> KRQQ-NH <sub>2</sub>           |
| b18                    | 972.2  | 2   | H- <b>G</b> IGAVLKVLTTGLPALIS.w | y10    | 803.7  | 2   | I.ISWIK <b>R</b> KRQQ-NH <sub>2</sub>            |
|                        |        |     |                                 | y9     | 747.2  | 2   | i.SWIK <b>R</b> KRQQ-NH <sub>2</sub>             |
|                        |        |     |                                 | y8     | 703.8  | 2   | s.WIK <b>R</b> KRQQ-NH <sub>2</sub>              |
|                        |        |     |                                 | y7     | 609.1  | 2   | w.IK <b>R</b> KRQQ-NH <sub>2</sub>               |
|                        |        |     |                                 | y5     | 978.8  | 1   | k. <b>R</b> KRQQ-NH <sub>2</sub>                 |
|                        |        |     |                                 | y5     | 489.9  | 1   | k. <b>R</b> KRQQ-NH <sub>2</sub>                 |
|                        |        |     |                                 | y4     | 558.3  | 1   | r.KRQQ-NH <sub>2</sub>                           |
| y4 - NH <sub>3</sub>   | 541.1  | 1   | r.KRQQ-NH <sub>2</sub>          |        |        |     |                                                  |

<sup>†</sup> **Oleoylation** and **palmitoylation** sites within the amino acid sequence of the peptide are highlighted in **bold red** and **bold blue** respectively.

**Table S31. Ions produced by fragmenting melittin modified by 1 oleoyl group + 1 palmitoyl group at  $m/z$  838 ( $z = 4$ ) at RT = 11.2 min of the EIC (see Fig. 3 and Fig. S13), LTQFT. Data are presented graphically in Fig. S19a.**

| b-Ions                 | $m/z$  | $z$ | Sequence Ladder <sup>†</sup> | y-Ions               | $m/z$  | $z$ | Sequence Ladder <sup>†</sup>                   |
|------------------------|--------|-----|------------------------------|----------------------|--------|-----|------------------------------------------------|
| b3                     | 492.2  | 1   | H- <b>G</b> IG.a             | y19                  | 1223.7 | 2   | k.VLTTGLPALISWIKR <b>K</b> RQQ-NH <sub>2</sub> |
| b4                     | 563.2  | 1   | H- <b>G</b> IGA.v            | y18                  | 1174.2 | 2   | v.LTTGLPALISWIKR <b>K</b> RQQ-NH <sub>2</sub>  |
| b5                     | 662.4  | 1   | H- <b>G</b> IGAV.I           | y17                  | 1117.7 | 2   | I.TTGLPALISWIKR <b>K</b> RQQ-NH <sub>2</sub>   |
| b5 + H <sub>2</sub> O  | 679.1  | 1   | H- <b>G</b> IGAV.I           | y16                  | 1066.9 | 2   | t.TGLPALISWIKR <b>K</b> RQQ-NH <sub>2</sub>    |
| b6                     | 775.2  | 1   | H- <b>G</b> IGAVL.k          | y15                  | 1016.4 | 2   | t.GLPALISWIKR <b>K</b> RQQ-NH <sub>2</sub>     |
| b8                     | 1002.6 | 1   | H- <b>G</b> IGAVLK.V.I       | y14                  | 988.0  | 2   | g.LPALISWIKR <b>K</b> RQQ-NH <sub>2</sub>      |
| b9                     | 1115.6 | 1   | H- <b>G</b> IGAVLK.VL.t      | y13                  | 931.5  | 2   | I.PALISWIKR <b>K</b> RQQ-NH <sub>2</sub>       |
| b10                    | 1216.7 | 1   | H- <b>G</b> IGAVLK.VLT.t     | y12                  | 882.8  | 2   | p.ALISWIKR <b>K</b> RQQ-NH <sub>2</sub>        |
| b12                    | 1374.7 | 1   | H- <b>G</b> IGAVLK.VLTTG.I   | y11                  | 847.2  | 2   | a.LISWIKR <b>K</b> RQQ-NH <sub>2</sub>         |
| b13                    | 1487.7 | 1   | H- <b>G</b> IGAVLK.VLTTGL.p  | y10                  | 790.8  | 2   | I.ISWIKR <b>K</b> RQQ-NH <sub>2</sub>          |
| b13 – H <sub>2</sub> O | 1469.8 | 1   | H- <b>G</b> IGAVLK.VLTTGL.p  | y9                   | 734.2  | 2   | i.SWIKR <b>K</b> RQQ-NH <sub>2</sub>           |
|                        |        |     |                              | y8                   | 690.8  | 2   | s.WIKR <b>K</b> RQQ-NH <sub>2</sub>            |
|                        |        |     |                              | y7                   | 598.0  | 2   | w.IKR <b>K</b> RQQ-NH <sub>2</sub>             |
|                        |        |     |                              | y6                   | 1080.1 | 1   | i.KR <b>K</b> RQQ-NH <sub>2</sub>              |
|                        |        |     |                              | y5                   | 953.2  | 1   | k.R <b>K</b> RQQ-NH <sub>2</sub>               |
|                        |        |     |                              | y4                   | 796.1  | 1   | r. <b>K</b> RQQ-NH <sub>2</sub>                |
|                        |        |     |                              | y4 - NH <sub>3</sub> | 779.5  | 1   | r. <b>K</b> RQQ-NH <sub>2</sub>                |

<sup>†</sup> **Oleoylation** and **palmitoylation** sites within the amino acid sequence of the peptide are highlighted in **bold red** and **bold blue** respectively.

**Table S32.** Ions produced by fragmenting melittin modified by 1 oleoyl group + 1 palmitoyl group at  $m/z$  838 ( $z = 4$ ) at RT = 11.2 min of the EIC (see Fig. 3 and Fig. S13), LTQFT. Data are presented graphically in Fig. S19b.

| b-ions                 | $m/z$  | $z$ | Sequence Ladder <sup>†</sup>    | y-ions | $m/z$  | $z$ | Sequence Ladder <sup>†</sup>                    |
|------------------------|--------|-----|---------------------------------|--------|--------|-----|-------------------------------------------------|
| b3                     | 466.3  | 1   | H- <b>G</b> IG.a                | y21    | 1356.8 | 2   | v.LKVLTGLPALISWIKR <b>K</b> RQQ-NH <sub>2</sub> |
| b4                     | 537.2  | 1   | H- <b>G</b> IGA.v               | y19    | 1236.5 | 2   | k.VLTTGLPALISWIKR <b>K</b> RQQ-NH <sub>2</sub>  |
| b5                     | 636.4  | 1   | H- <b>G</b> IGAV.I              | y18    | 1186.5 | 2   | v.LTTGLPALISWIKR <b>K</b> RQQ-NH <sub>2</sub>   |
| b6                     | 749.8  | 1   | H- <b>G</b> IGAVL.k             | y17    | 1130.4 | 2   | I.TTGLPALISWIKR <b>K</b> RQQ-NH <sub>2</sub>    |
| b7                     | 877.7  | 1   | H- <b>G</b> IGAVLK.v            | y16    | 1079.7 | 2   | t.TGLPALISWIKR <b>K</b> RQQ-NH <sub>2</sub>     |
| b8                     | 976.6  | 1   | H- <b>G</b> IGAVLKV.I           | y15    | 1029.1 | 2   | t.GLPALISWIKR <b>K</b> RQQ-NH <sub>2</sub>      |
| b9                     | 1089.6 | 1   | H- <b>G</b> IGAVLKVL.t          | y14    | 1000.7 | 2   | g.LPALISWIKR <b>K</b> RQQ-NH <sub>2</sub>       |
| b10                    | 1190.1 | 1   | H- <b>G</b> IGAVLKVLT.t         | y13    | 944.5  | 2   | I.PALISWIKR <b>K</b> RQQ-NH <sub>2</sub>        |
| b12                    | 1348.7 | 1   | H- <b>G</b> IGAVLKVLTTG.I       | y12    | 896.0  | 2   | p.ALISWIKR <b>K</b> RQQ-NH <sub>2</sub>         |
| b12 - H <sub>2</sub> O | 1330.6 | 1   | H- <b>G</b> IGAVLKVLTTG.I       | y11    | 860.5  | 2   | a.LISWIKR <b>K</b> RQQ-NH <sub>2</sub>          |
| b12 - H <sub>2</sub> O | 665.8  | 2   | H- <b>G</b> IGAVLKVLTTG.I       | y10    | 803.9  | 2   | I.ISWIKR <b>K</b> RQQ-NH <sub>2</sub>           |
| b13                    | 1462.2 | 1   | H- <b>G</b> IGAVLKVLTTGL.p      | y9     | 746.8  | 2   | i.SWIKR <b>K</b> RQQ-NH <sub>2</sub>            |
| b13 - H <sub>2</sub> O | 1443.9 | 1   | H- <b>G</b> IGAVLKVLTTGL.p      | y8     | 703.8  | 2   | s.WIKR <b>K</b> RQQ-NH <sub>2</sub>             |
| b18                    | 972.3  | 2   | H- <b>G</b> IGAVLKVLTTGLPALIS.w | y5     | 489.9  | 2   | k.R <b>K</b> RQQ-NH <sub>2</sub>                |
|                        |        |     |                                 | y4     | 822.6  | 1   | r. <b>K</b> RQQ-NH <sub>2</sub>                 |

<sup>†</sup> **Oleoylation** and **palmitoylation** sites within the amino acid sequence of the peptide are highlighted in **bold red** and **bold blue** respectively.

## References

- 1 C. J. Van Echteld, B. de Kruijff, J. G. Mandersloot and J. De Gier, *Biochim. Biophys. Acta*, 1981, **649**, 211–220.
- 2 J. R. Henriksen, T. L. Andresen, L. N. Feldborg, L. Duelund and J. H. Ipsen, *Biophys. J.*, 2010, **98**, 2199–2205.
- 3 D. V. Zhelev, *Biophys. J.*, 1998, **75**, 321–330.
- 4 D. Needham and D. V. Zhelev, *Ann. Biomed. Eng.*, 1995, **23**, 287–298.
